# Supplementary material for: Blood Leukocyte Transcriptional Modules and Differentially Expressed Genes Associated with Disease Severity and Age in COVID-19 Patients
Source: Preprints.org preprint supplement (doi:10.20944/preprints202208.0181.v1), 2022-08-09
Supplement: Supplementary file 1 [file TableS1_Bando et al.xlsx]

## Sheet: Table S1
Table S1. Clinical and demographic data of the 121 patients
	Patient ID	Sex	Age (months)	Age (yrs)	Comorbidities
Severe group
	C018	Female	0	0	Preterm
	C107	Female	1.1	0.0916667	Preterm
	C083	Male	1.13333	0.0944444	Neonate
	C126	Male	1.26667	0.105556	No
	C001	Male	1.9	0.158333	No
	C068	Female	4.6	0.383333	SAH;Obesity
	C020	Female	98.5667	8.21389	No
Subgroup A	C097	Male	129.9	10.825	Pneumopathy
	C098	Male	174.667	14.5556	No
	C110	Female	296.8	24.7333	Obesity
	C162	Male	361.8	30.15	Obesity
	C075	Male	412.767	34.3972	No
	C017	Male	428.033	35.6694	No
	C103	Female	437.367	36.4472	Obesity
	C057	Male	453.033	37.7528	Obesity
	C104	Male	459.767	38.3139	Obesity
	C014	Male	462.867	38.5722	Cardiopathy;SAH;DM;Obesity;Drug addiction
	C078	Male	466.833	38.9028	SAH;Obesity
	C016	Male	468.7	39.0583	Obesity
Subgroup B	C080	Female	495.9	41.325	Obesity
	C128	Female	503.2	41.9333	Obesity
	C004	Male	520.833	43.4028	SAH;DM;Obesity
	C065	Female	556.1	46.3417	SAH;Obesity
	C005	Male	569.533	47.4611	SAH;DM;Obesity
	C070	Male	580.267	48.3556	SAH;Talassemia
	C003	Male	586.767	48.8972	SAH;Cardiopathy
	C132	Female	587.133	48.9278	SAH;DM;Obesity
	C027V	Male	590	49.1667	No
	C109	Male	594.267	49.5222	SAH;DM;Obesity
	C172	Male	595.1	49.5917	DM;Obesity
	C096	Male	597.267	49.7722	DM;Obesity;Cardiopathy
	C141	Female	606.333	50.5278	SAH;Obesity
	C081	Female	617.267	51.4389	SAH;Obesity
	C127	Male	648.1	54.0083	DM;Obesity;Cardiopathy;Nephropathy
	C077	Male	651.833	54.3194	SAH;DM;Obesity
	C129	Female	654.4	54.5333	DM;Obesity
	C131	Female	665.667	55.4722	Obesity;Cancer
	C108	Female	668.867	55.7389	DM;Obesity
	C133	Male	684.033	57.0028	DM
	C056	Male	710.7	59.225	SAH
	C105	Female	730.733	60.8944	SAH;Obesity;Pneumopathy
	C092V	Male	750	62.5	SAH;DM
	C066	Male	750.8	62.5667	No
	C153	Male	758.1	63.175	SAH;Asperger
	C015	Female	764.733	63.7278	SAH;Obesity
	C154	Male	773.2	64.4333	SAH;Obesity
	C106	Female	777.433	64.7861	SAH;DM;Obesity;Nephropathy
	C040	Male	792.867	66.0722	Cardiopathy;Obesity
	C076	Female	811.567	67.6306	SAH;DM
	C134	Female	820.7	68.3917	Cardiopathy;SAH;DM
	C039	Female	838.4	69.8667	SAH;Obesity
	C019	Male	864.1	72.0083	SAH
	C002	Female	870.9	72.575	SAH;DM;Obesity
	C069	Male	873.433	72.7861	SAH;Obesity;Cardiopathy
	C067	Male	894.967	74.5806	SAH;DM;Obesity;Pneumopathy
	C041	Female	900.067	75.0056	Epilepsy
	C079	Male	913.567	76.1306	SAH;Cardiopathy
	C082	Male	976.7	81.3917	SAH
Mild group
	C146	Male	8	0	No
	C150	Female	28	2	No
	C165	Female	55	5	No
	C062	Male	66	6	Cerebral palsy (mild)
	C144	Male	85	7	No
Subgroup C	C152	Female	118	10	No
	C140	Female	127	11	No
	C171	Female	128	11	Asthma
	C164	Female	152	13	No
	C178	Female	168	14	No
	C122	Male	181	15	Cardiopathy
	C048	Male	202	17	No
	C094	Female	207	17	No
	C008A	Female	218	18	No
	C086	Male	225	19	Obesity
	C002A	Male	278	23	No
	C088	Male	297	25	No
	C026V	Female	300	25	No
	C174	Female	311	26	No
	C053	Female	313	26	Hypercholesterolemia
	C047	Female	314	26	No
	C142	Female	350	29	No
	C022V	Female	357	30	No
	C013	Female	359	30	No
	C055	Female	367	31	No
	C052	Male	375	31	No
	C138	Female	377	31	No
	C125	Male	394	33	No
	C124	Female	397	33	No
	C017B	Male	406	34	No
	C137	Male	414	35	No
	C143	Female	430	36	Obesity;Asthma
	C071	Female	435	36	No
	C149	Male	439	14.6333	No
	C091	Female	440	37	No
	C163	Female	444	37	No
	C072	Male	448	37	SAH
	C006A	Female	473	39	No
	C054	Female	473	39	No
	C090	Female	485	40	No
	C021V	Male	486	40	No
Subgroup D	C121	Female	492	41	Cardiopathy
	C060V-2	Male	494	41	No
	C032V	Female	497	41	No
	C120	Male	497	41	No
	C169	Female	502	42	No
	C148	Female	507	42	No
	C044	Male	514	43	No
	C001A	Male	527	44	No
	C179	Male	600	50	No
	C099V	Female	627	52	No
	C087	Female	632	53	SAH;DM;Obesity;Rheumatoid
	C073	Female	663	55	No
	C049	Female	687	57	SAH;DM;Hyperlipidemia
	C036V	Female	708	59	SAH;DM;Immunodeficiency diseases
	C166	Female	708	59	No
	C130	Female	724	24.1333	SAH;DM;Multiple sclerosis;Cancer
	C118	Male	771	64	No
	C029V	Male	772	64	Pneumopathy
	C051	Male	862	72	No
	C084	Female	878	73	SAH;DM
	C045	Male	884	74	SAH;Hyperlipidemia
	C085	Male	957	80	SAH
