# Supplementary material for: Blood Leukocyte Transcriptional Modules and Differentially Expressed Genes Associated with Disease Severity and Age in COVID-19 Patients
Source: Preprints.org preprint supplement (doi:10.20944/preprints202208.0181.v1), 2022-08-09
Supplement: Supplementary file 2 [file TableS2_Bando et al.xlsx]

## Sheet: Table S2
Table S2. Clinical and demographic data of the patients included in the transcriptomic analyses
							WBCb			RBC				Cytokynes
Group	Patient ID	Gender	Age (yrs)	Comorbiditya	Antibiotics	Corticosteroids	S-Neutrophils	I-Neurophils	Lymphocytes	Erythrocytes	Hemoglobin	Hematocrit	Platelets	IL-2 pg/ml	IL-4 pg/ml	IL-6 pg/ml	IL-10 pg/ml	IFN pg/ml
Severe	C097	Male	10.825	No	No	Yes	High	Low	Low	Normal	Normal	Normal	Normal	2.73404	0.769781	1.0135	0.330066	0
	C098	Male	14.5556	Pneumopathy	Yes	No	High	High	Low	Normal	Normal	Normal	Low	0	1.31825	4.31799	1.50592	0.16415
	C110	Female	24.7333	Obesity	No	No	High	Low	Normal	Normal	Normal	Normal	Normal	0.602922	ND	4.45069	2.01049	0.201824
	C103	Female	36.4472	Obesity	Yes	No	High	Low	Normal	Normal	Normal	Normal	Normal	0	ND	17.3768	5.26215	0.455094
	C104	Male	38.3139	Obesity	Yes	Yes	Normal	Low	Normal	Normal	High	Normal	Normal	ND	ND	3.24921	1.31619	0.0514454
	C080	Female	41.325	Obesity	Yes	Yes	High	Low	Low	Normal	Normal	Normal	Normal	0.556543	0.213979	1.2067	0.161862	0
	C003	Male	48.8972	SAH; Cardiopathy	Yes	No	Normal	Low	Low	Normal	Normal	Low	High	0.170878	ND	4.41227	0.495099	ND
	C077	Male	54.3194	Obesity; SAH; DM	Yes	No	High	Low	Low	Normal	Normal	Normal	Normal	3.58843	ND	8.10348	1.33402	ND
	C129	Female	54.5333	Obesity; DM	Yes	Yes	High	Low	Low	Normal	Normal	Normal	Normal	0.0463786	ND	1.94326	0.383357	0.0514454
	C108	Female	55.7389	Obesity; DM	Yes	No	High	Low	Low	Normal	Normal	Normal	High	ND	0.111269	5.08821	0.161862	0.0989335
	C092	Male	62.5	SAH; DM	No	No	High	High	Low	Normal	Low	Low	Normal	6.82432	6.84095	74.7448	25.7782	0.201824
Mild	C152	Female	9.83333	No	No	No	Low	Low	High	High	Normal	High	Normal	0.278272	ND	2.67459	0.600592	ND
	C122	Male	15.0833	Cardiopathy	No	No	Normal	Low	Normal	Normal	Normal	Normal	Normal	ND	0.111269	1.54625	0.327983	0
	C048	Male	16.8333	No	No	No	Normal	Low	Normal	Normal	High	Normal	Normal	ND	ND	0.980505	0.526042	ND
	C143	Female	35.8333	Obesity	No	No	Normal	Low	Normal	Normal	Normal	Normal	Normal	0.139136	ND	1.54625	0.545218	ND
	C071	Female	36.25	No	No	No	Normal	Low	High	Normal	High	Normal	Normal	0.341755	0.394513	0.791946	0.195977	0.0410375
	C149	Male	36.5833	No	No	No	Normal	Low	Normal	Normal	Normal	Normal	Normal	0.0463786	0.213979	2.57012	0.600592	ND
	C072	Male	37.3333	SAH	No	No	Normal	Low	High	Normal	Normal	Normal	Normal	0.170878	1.7705	0.598673	0.330066	0.579654
	C121	Female	41	Cardioptahy	No	No	Normal	Low	Normal	Normal	Normal	Normal	Normal	0.371029	ND	0.538053	0.43873	0.150379
	C148	Female	42.25	No	No	No	Normal	Low	Normal	Normal	High	Normal	Normal	0.417408	0.547785	1.2067	0.110747	ND
	C044	Male	42.8333	No	No	No	Normal	Normal	Low	Normal	Normal	Normal	Normal	ND	ND	3.6109	0.66357	ND
	C049	Female	57.25	SAH; DM	No	No	Low	Low	High	Normal	Normal	Normal	Normal	2.39229	ND	7.12921	1.84974	0.0410375
	C118	Male	64.25	No	No	No	Normal	Low	Normal	Normal	High	Normal	Normal	ND	ND	1.83878	0.43873	0
aComorbidities: SAH, Systemic Arterial Hypertension; DM, Diabetes mellitus
bSegmented- (S) or immature- (I) neutrophils
WBC: White Blood Cells; RBC: Red Blood Cells; yrs: years; ND: Not determined
