# Supplementary material for: Blood Leukocyte Transcriptional Modules and Differentially Expressed Genes Associated with Disease Severity and Age in COVID-19 Patients
Source: Preprints.org preprint supplement (doi:10.20944/preprints202208.0181.v1), 2022-08-09
Supplement: Supplementary file 3 [file TableS5_Bando et al.xlsx]

## Sheet: Table S5
Table S5. Enrichment analyses for the yellow module. The terms that appear in the histogram (Figure 6) are highlighted in grey. In bold, HH genes
Term (KEGG-2021)	Nº genes	Adjusted p-value	Odds Ratio	Genes
Endocytosis	17	0.00865459	3.01982	SH3GLB1;ACTR3;GIT2;PDCD6IP;VPS4B;VPS26A;SNX3;RAB31;ARPC2;CHMP1B;CAPZA2;CHMP2B;CHMP2A;STAM2;SNX6;HSPA1A;CHMP5
Salmonella infection	16	0.0133642	2.86069	ACTR3;MAP2K1;IL18;TXN;NLRC4;TUBA1C;TUBA1B;ARPC2;PIK3CA;CASP4;CASP1;FLNA;MAPK1;KPNA4;TLR4;ACTR10
Tuberculosis	14	0.00865459	3.51043	CAMK2D;CEBPB;IFNGR1;SPHK1;IL18;RFXANK;CASP9;CLEC7A;LAMP2;ATP6V1H;MAPK1;JAK2;FCGR2B;TLR4
Pathogenic Escherichia coli infection	14	0.0131012	3.18153	ACTR3;RAB1A;ROCK1;IL18;CASP9;GNA13;TUBA1C;TUBA1B;ARPC2;CASP4;CASP1;FAS;MAPK1;TLR4
Yersinia infection	12	0.00865459	3.98719	ACTR3;GIT2;MAP2K1;ARPC2;PIK3CA;ROCK1;CASP1;IL18;MAPK1;NLRC4;TLR4;VAV1
Necroptosis	12	0.013759	3.38662	CAMK2D;IFNGR1;CHMP1B;VPS4B;CHMP2B;CHMP2A;CASP1;FAS;JAK2;GLUL;TLR4;CHMP5
Autophagy	11	0.013759	3.61798	SH3GLB1;RAB1A;MAP2K1;PIK3CA;ATG16L1;LAMP2;PTEN;MAPK1;PRKCQ;WIPI1;NRBF2
HIF-1 signaling pathway	10	0.0131012	4.18298	EGLN1;MAP2K1;LDHA;CAMK2D;PIK3CA;IFNGR1;CUL2;MAPK1;TLR4;LDHAL6A
Legionellosis	9	0.00206592	7.76848	CASP9;RAB1A;SAR1B;CASP1;IL18;NLRC4;TLR4;CLK4;HSPA1A
Fc gamma R-mediated phagocytosis	9	0.0141159	4.22865	LYN;ACTR3;MAP2K1;ARPC2;PIK3CA;SPHK1;MAPK1;FCGR2B;VAV1
PD-L1 expression and PD-1 checkpoint pathway in cancer	8	0.0318678	4.07643	MAP2K1;PIK3CA;IFNGR1;PTEN;MAPK1;PRKCQ;JAK2;TLR4
Term (Reactome-2016)	Nº genes	Adjusted p-value	Odds Ratio	Genes
Metabolism Homo sapiens R-HSA-1430728	68	0.0172382	1.58985	PTEN;ETFA;NUDT5;DHTKD1;PSMD9;MED11;SPTLC1;IMPA1;NAMPT;PDK3;UPP1;ACAA1;GYG1;LBR;GLUL;PGM1;CSGALNACT1;GPX1;GSTO2;ELOVL5;SPHK1;TALDO1;CTPS2;AMPD3;PHKA2;SDHB;HADHB;COX7A2L;LMBRD1;RRM2B;PIK3CA;TST;B3GNT2;FAR1;TKT;POM121;OAT;SMARCD3;NDUFB6;SAR1B;INSIG2;NDUFB3;MGST1;ABHD5;TXN;HSD17B11;LDHA;CYB5R4;GNG10;RAP1A;GNG5;ALOX5;ST3GAL6;DECR1;COQ7;PSMB8;PSMB9;SULT1B1;MLXIPL;HAL;TMLHE;VAPA;IMPDH1;LPCAT3;LPCAT2;GNB…
Immune System Homo sapiens R-HSA-168256	56	0.0301969	1.60091	EIF4E3;RNF14;EIF4A3;PTEN;UBE2D1;CASP9;PSMD9;HERC4;CASP4;CASP1;KPNA4;JAK2;ATP6V1E1;B2M;ACTR3;MAP2K1;ATP6V0E1;IFNGR1;IL18;VAV1;APBB1IP;RNF144B;RNF126;CLEC4D;PIK3CA;TAX1BP1;RAPGEF2;PRKCQ;TLR10;CD46;TLR4;POM121;CAMK2D;SAR1B;CUL2;NLRC4;TXN;RCHY1;FYB;RAP1A;CLEC7A;S100A12;ATP6V1H;MAPK1;RNF130;LYN;UBE2G1;UBE2A;PSMB8;PSMB9;GZMM;ARPC2;CAPZA2;ASB7;OSBPL1A;FCGR2B
Metabolism of proteins Homo sapiens R-HSA-392499	43	0.0201965	1.76872	RAB1A;COPB2;POM121;PCNA;HIST1H2BJ;SAR1B;CETN2;HIST1H2BK;TXN;NPL;PCMT1;TUBA1C;EXOSC6;TUBA1B;C1GALT1C1;GNG10;CHCHD2;HIST1H3A;GRPEL1;MAN2A2;GNG5;DPH3;HIST1H2AD;ST3GAL6;B2M;HIST1H2AC;TRAPPC3;SLC35A1;MTX2;H2AFZ;SPHK1;GALNT1;TBCD;RAB27A;WIPI1;RANGAP1;MSRA;PDCL;B3GNT2;GNB3;TPP1;FKBP9;PIGF
Innate Immune System Homo sapiens R-HSA-168249	33	0.0405529	1.79213	CAMK2D;PTEN;UBE2D1;NLRC4;TXN;CASP9;PSMD9;RAP1A;CLEC7A;CASP4;CASP1;S100A12;MAPK1;JAK2;B2M;LYN;ACTR3;MAP2K1;PSMB8;VAV1;PSMB9;APBB1IP;GZMM;CLEC4D;ARPC2;PIK3CA;CAPZA2;TAX1BP1;RAPGEF2;PRKCQ;TLR10;CD46;TLR4
Cellular responses to stress Homo sapiens R-HSA-2262752	27	0.000249993	3.3699	POM121;CEBPB;CAMK2D;HIST1H2BJ;CUL2;HIST1H2BK;UBE2D1;TXN;ETS2;PRDX3;MAP1LC3B;HIST1H3A;BAG1;HIST1H2AD;MAPK1;NBN;HIST1H2AC;EGLN1;GPX1;HSBP1;H2AFZ;WIPI1;TFDP1;ATG16L1;CHMP2B;CHMP2A;HSPA1A
Vesicle-mediated transport Homo sapiens R-HSA-5653656	25	0.0138712	2.24674	RAB1A;COPB2;SAR1B;VPS4B;SNAP23;MAN2A2;STX6;KIF1B;AP3S1;APOL1;RAB6A;YWHAH;TRAPPC3;SNAPIN;SORT1;GALNT1;VAMP7;CHMP2B;RAB18;YIPF6;CHMP2A;STAM2;RHOQ;PICALM;CHMP5
Hemostasis Homo sapiens R-HSA-109582	25	0.0392804	1.98468	LGALS3BP;CD63;PRCP;GNA13;GNG10;RAP1A;HIST1H3A;GNG5;LAMP2;MFN2;FLNA;MAPK1;KIF1B;CD58;JAK2;LYN;SRGN;CBX5;VAV1;APBB1IP;PIK3CA;CAPZA2;GNB3;PRKCQ;CD47
Membrane Trafficking Homo sapiens R-HSA-199991	24	0.0114303	2.54745	TRAPPC3;RAB1A;COPB2;SNAPIN;SAR1B;SORT1;VPS4B;GALNT1;SNAP23;VAMP7;MAN2A2;CHMP2B;STX6;RAB18;YIPF6;CHMP2A;KIF1B;AP3S1;RAB6A;STAM2;RHOQ;PICALM;YWHAH;CHMP5
Signaling by Wnt Homo sapiens R-HSA-195721	19	0.0114303	2.88008	HIST1H2BJ;H2AFZ;HIST1H2BK;KREMEN1;SCRIB;VPS26A;KLHL12;PSMB8;PSMB9;SNX3;PSMD9;FRAT1;GNG10;HIST1H3A;GNG5;HIST1H2AD;GNB3;TMED5;HIST1H2AC
Platelet activation, signaling and aggregation Homo sapiens R-HSA-76002	17	0.0114303	3.00687	LYN;LGALS3BP;SRGN;CD63;VAV1;APBB1IP;GNA13;GNG10;RAP1A;PIK3CA;GNG5;LAMP2;FLNA;GNB3;MAPK1;PRKCQ;JAK2
RHO GTPase Effectors Homo sapiens R-HSA-195258	17	0.0114303	2.98129	ACTR3;ROCK1;HIST1H2BJ;H2AFZ;HIST1H2BK;RANGAP1;ZWINT;CLIP1;HIST1H3A;ARPC2;FLNA;HIST1H2AD;MAPK1;B9D2;RHOQ;HIST1H2AC;YWHAH
M Phase Homo sapiens R-HSA-68886	17	0.0130719	2.82498	RAB1A;POM121;HIST1H2BJ;H2AFZ;HIST1H2BK;UBE2D1;RANGAP1;ZWINT;PSMB8;PSMB9;PSMD9;CLIP1;HIST1H3A;HIST1H2AD;MAPK1;B9D2;HIST1H2AC
Cellular Senescence Homo sapiens R-HSA-2559583	13	0.0114303	3.65168	CEBPB;HIST1H2BJ;H2AFZ;HIST1H2BK;UBE2D1;TXN;ETS2;HIST1H3A;TFDP1;HIST1H2AD;MAPK1;NBN;HIST1H2AC
Apoptosis Homo sapiens R-HSA-109581	13	0.0114303	3.60262	ROCK1;SATB1;HMGB2;PSMB8;PSMB9;CASP9;PSMD9;TFDP1;TP53BP2;FAS;PRKCQ;TLR4;YWHAH
Programmed Cell Death Homo sapiens R-HSA-5357801	13	0.0121264	3.53143	ROCK1;SATB1;HMGB2;PSMB8;PSMB9;CASP9;PSMD9;TFDP1;TP53BP2;FAS;PRKCQ;TLR4;YWHAH
Senescence-Associated Secretory Phenotype (SASP) Homo sapiens R-HSA-2559582	9	0.0114303	5.478	CEBPB;HIST1H3A;HIST1H2BJ;H2AFZ;HIST1H2BK;UBE2D1;HIST1H2AD;MAPK1;HIST1H2AC
Oxidative Stress Induced Senescence Homo sapiens R-HSA-2559580	9	0.0138088	4.53947	TFDP1;HIST1H3A;HIST1H2BJ;H2AFZ;HIST1H2BK;HIST1H2AD;MAPK1;TXN;HIST1H2AC
Protein folding Homo sapiens R-HSA-391251	9	0.0201965	4.04396	TUBA1C;GNG10;TUBA1B;GNG5;SPHK1;TBCD;PDCL;GNB3;FKBP9
Mitotic Prophase Homo sapiens R-HSA-68875	9	0.0279581	3.7952	RAB1A;POM121;HIST1H3A;HIST1H2BJ;H2AFZ;HIST1H2BK;HIST1H2AD;MAPK1;HIST1H2AC
trans-Golgi Network Vesicle Budding Homo sapiens R-HSA-199992	8	0.0130719	5.33087	VAMP7;SNAPIN;SORT1;SNAP23;YIPF6;CHMP2A;AP3S1;PICALM
Clathrin derived vesicle budding Homo sapiens R-HSA-421837	8	0.0130719	5.33087	VAMP7;SNAPIN;SORT1;SNAP23;YIPF6;CHMP2A;AP3S1;PICALM
NoRC negatively regulates rRNA expression Homo sapiens R-HSA-427413	8	0.0138088	5.08404	HIST1H3A;HIST1H2BJ;H2AFZ;SAP130;HIST1H2BK;MBD2;HIST1H2AD;HIST1H2AC
Negative epigenetic regulation of rRNA expression Homo sapiens R-HSA-5250941	8	0.0160638	4.859	HIST1H3A;HIST1H2BJ;H2AFZ;SAP130;HIST1H2BK;MBD2;HIST1H2AD;HIST1H2AC
Metabolism of nucleotides Homo sapiens R-HSA-15869	8	0.028614	4.18006	GPX1;RRM2B;IMPDH1;CTPS2;UPP1;AMPD3;TXN;NUDT5
Chaperonin-mediated protein folding Homo sapiens R-HSA-390466	8	0.0403522	3.79413	TUBA1C;TUBA1B;GNG10;GNG5;SPHK1;PDCL;GNB3;FKBP9
RNA Polymerase I Promoter Opening Homo sapiens R-HSA-73728	7	0.00246616	12.5724	HIST1H3A;HIST1H2BJ;H2AFZ;HIST1H2BK;MBD2;HIST1H2AD;HIST1H2AC
RMTs methylate histone arginines Homo sapiens R-HSA-3214858	7	0.0114303	7.60376	SMARCD3;HIST1H3A;H2AFZ;HIST2H2AB;HIST1H2AD;JAK2;HIST1H2AC
Meiotic recombination Homo sapiens R-HSA-912446	7	0.0130719	6.14488	HIST1H3A;HIST1H2BJ;H2AFZ;HIST1H2BK;HIST1H2AD;NBN;HIST1H2AC
RHO GTPases activate PKNs Homo sapiens R-HSA-5625740	7	0.0172382	5.44755	HIST1H3A;HIST1H2BJ;H2AFZ;HIST1H2BK;HIST1H2AD;HIST1H2AC;YWHAH
Amyloid fiber formation Homo sapiens R-HSA-977225	7	0.0290269	4.73118	HIST1H3A;HIST1H2BJ;H2AFZ;HIST1H2BK;HIST1H2AD;B2M;HIST1H2AC
Transcriptional regulation by small RNAs Homo sapiens R-HSA-5578749	7	0.0366804	4.43911	POM121;HIST1H3A;HIST1H2BJ;H2AFZ;HIST1H2BK;HIST1H2AD;HIST1H2AC
G alpha (12/13) signalling events Homo sapiens R-HSA-416482	7	0.0405529	4.24262	GNA13;GNG10;PIK3CA;ROCK1;GNG5;GNB3;VAV1
RNA Polymerase I Promoter Clearance Homo sapiens R-HSA-73854	7	0.0428537	4.18091	HIST1H3A;HIST1H2BJ;H2AFZ;HIST1H2BK;MBD2;HIST1H2AD;HIST1H2AC
DNA methylation Homo sapiens R-HSA-5334118	6	0.0114303	9.5113	HIST1H3A;HIST1H2BJ;H2AFZ;HIST1H2BK;HIST1H2AD;HIST1H2AC
Activated PKN1 stimulates transcription of AR (androgen receptor) regulated genes KLK2 and KLK3 Homo sapiens R-HSA-5625886	6	0.0114303	8.83102	HIST1H3A;HIST1H2BJ;H2AFZ;HIST1H2BK;HIST1H2AD;HIST1H2AC
SIRT1 negatively regulates rRNA Expression Homo sapiens R-HSA-427359	6	0.0114303	8.52606	HIST1H3A;HIST1H2BJ;H2AFZ;HIST1H2BK;HIST1H2AD;HIST1H2AC
PRC2 methylates histones and DNA Homo sapiens R-HSA-212300	6	0.0138088	7.27036	HIST1H3A;HIST1H2BJ;H2AFZ;HIST1H2BK;HIST1H2AD;HIST1H2AC
Condensation of Prophase Chromosomes Homo sapiens R-HSA-2299718	6	0.0145844	7.06228	HIST1H3A;HIST1H2BJ;H2AFZ;HIST1H2BK;HIST1H2AD;HIST1H2AC
ERCC6 (CSB) and EHMT2 (G9a) positively regulate rRNA expression Homo sapiens R-HSA-427389	6	0.0169574	6.67985	HIST1H3A;HIST1H2BJ;H2AFZ;HIST1H2BK;HIST1H2AD;HIST1H2AC
Deposition of new CENPA-containing nucleosomes at the centromere Homo sapiens R-HSA-606279	6	0.0330723	5.37044	HIST1H2BJ;H2AFZ;HIST1H2BK;HIST1H2AD;OIP5;HIST1H2AC
Nucleosome assembly Homo sapiens R-HSA-774815	6	0.0330723	5.37044	HIST1H2BJ;H2AFZ;HIST1H2BK;HIST1H2AD;OIP5;HIST1H2AC
Golgi Associated Vesicle Biogenesis Homo sapiens R-HSA-432722	6	0.0383859	5.14614	VAMP7;SNAPIN;SORT1;YIPF6;AP3S1;PICALM
RNA Polymerase I Chain Elongation Homo sapiens R-HSA-73777	6	0.0435306	4.84268	HIST1H3A;HIST1H2BJ;H2AFZ;HIST1H2BK;HIST1H2AD;HIST1H2AC
Budding and maturation of HIV virion Homo sapiens R-HSA-162588	5	0.0130719	10.2853	PDCD6IP;VPS4B;CHMP2B;CHMP2A;CHMP5
Endosomal Sorting Complex Required For Transport (ESCRT) Homo sapiens R-HSA-917729	5	0.0160821	8.9424	VPS4B;CHMP2B;CHMP2A;STAM2;CHMP5
Packaging Of Telomere Ends Homo sapiens R-HSA-171306	5	0.0214441	7.90936	HIST1H2BJ;H2AFZ;HIST1H2BK;HIST1H2AD;HIST1H2AC
Thrombin signalling through proteinase activated receptors (PARs) Homo sapiens R-HSA-456926	5	0.0241875	7.61603	GNA13;GNG10;GNG5;MAPK1;GNB3
Thromboxane signalling through TP receptor Homo sapiens R-HSA-428930	4	0.0403522	8.64355	GNA13;GNG10;GNG5;GNB3
Protein repair Homo sapiens R-HSA-5676934	3	0.0130719	41.0042	PCMT1;MSRA;TXN
Term (GO BP-2021)	Nº genes	Adjusted p-value	Odds Ratio	Genes
neutrophil degranulation (GO:0043312)	44	3.71496e-11	4.41724	CD63;ROCK1;BRI3;MVP;SNAP23;MGST1;PRCP;SDCBP;MMP25;RAP1A;ALOX5;LAMP2;S100A12;MAPK1;STOM;CD58;RAB6A;ACAA1;GYG1;B2M;GOLGA7;PGM1;ANXA3;RNASET2;RAB27A;ADAM10;ATP11B;RNASE3;AMPD3;BST1;VAMP7;RAB31;CLEC4D;DOK3;BIN2;VAPA;IMPDH1;QPCT;SLCO4C1;RAB18;CD47;YPEL5;ACTR10;HSPA1A
neutrophil activation involved in immune response (GO:0002283)	44	3.71496e-11	4.37626	CD63;ROCK1;BRI3;MVP;SNAP23;MGST1;PRCP;SDCBP;MMP25;RAP1A;ALOX5;LAMP2;S100A12;MAPK1;STOM;CD58;RAB6A;ACAA1;GYG1;B2M;GOLGA7;PGM1;ANXA3;RNASET2;RAB27A;ADAM10;ATP11B;RNASE3;AMPD3;BST1;VAMP7;RAB31;CLEC4D;DOK3;BIN2;VAPA;IMPDH1;QPCT;SLCO4C1;RAB18;CD47;YPEL5;ACTR10;HSPA1A
neutrophil mediated immunity (GO:0002446)	44	3.71496e-11	4.34601	CD63;ROCK1;BRI3;MVP;SNAP23;MGST1;PRCP;SDCBP;MMP25;RAP1A;ALOX5;LAMP2;S100A12;MAPK1;STOM;CD58;RAB6A;ACAA1;GYG1;B2M;GOLGA7;PGM1;ANXA3;RNASET2;RAB27A;ADAM10;ATP11B;RNASE3;AMPD3;BST1;VAMP7;RAB31;CLEC4D;DOK3;BIN2;VAPA;IMPDH1;QPCT;SLCO4C1;RAB18;CD47;YPEL5;ACTR10;HSPA1A
membrane organization (GO:0061024)	25	6.10144e-07	4.8986	UBXN2B;SAR1B;VPS4B;SNAP23;CORO1C;SNX3;SPAST;TMEM43;CHMP1B;REPS2;MFN2;SH3GLB1;ACTR3;PDCD6IP;VAMP7;ARPC2;VAPA;LPCAT3;LPCAT2;CHMP2B;AAK1;CHMP2A;STAM2;PICALM;CHMP5
protein transport (GO:0015031)	24	0.00182413	2.93183	COPB2;RAB1A;ATP6V0E1;USP6;SAR1B;STX7;VPS26A;RAB32;RAB31;CHMP1B;LAMP2;CHMP2B;STX6;CHMP2A;RAB18;RUNDC1;ATP6V1H;ATP6V1E1;RAB6A;GOLGA7;TMED5;SNX6;RAB8B;YWHAH
organelle organization (GO:0006996)	23	0.0270267	2.42969	RAB1A;PDCD6IP;ATL3;UBXN2B;SAR1B;MTX2;SORT1;VPS4B;STX7;SIRT5;RANBP9;TTC17;PRDX3;RAB32;CHCHD2;RAB31;VAPA;CHMP1B;CHMP2B;RAB18;CHMP2A;TMED5;CHMP5
organelle assembly (GO:0070925)	23	0.0296266	2.39884	ACTR3;RAB1A;MKKS;PDCD6IP;UBXN2B;VPS4B;STX7;HPS1;SNX10;WIPI1;RAB32;MAP1LC3B;BIN2;RP2;ATG16L1;CHMP1B;CHMP2B;CHMP2A;FLNA;B9D2;STAM2;RAB8B;CHMP5
cellular protein localization (GO:0034613)	22	0.00247553	3.01291	CD63;COPB2;RAB1A;USP6;SAR1B;STX7;VPS26A;WIPI1;PTPRK;TM9SF2;RAB32;RAB31;UNC50;STX6;RAB18;RUNDC1;FLNA;MFN2;RAB6A;TMED5;SNX6;YWHAH
transmembrane receptor protein tyrosine kinase signaling pathway (GO:0007169)	22	0.0334112	2.41192	LYN;ACTR3;ATP6V0E1;ROCK1;SORT1;MVP;VAV1;EFNB1;SDCBP;ARPC2;PIK3CA;NAMPT;CASS4;RAPGEF2;ATP6V1H;MAPK1;SHOC2;AP3S1;JAK2;ATP6V1E1;RHOQ;MPZL1
macroautophagy (GO:0016236)	11	0.0190465	4.18592	MAP1LC3B;VAMP7;ATG16L1;VPS4B;LAMP2;CHMP2B;NBR1;CHMP2A;MFN2;WIPI1;STAM2
multivesicular body organization (GO:0036257)	8	0.000213931	14.399	PDCD6IP;VPS4B;CHMP1B;CHMP2B;CHMP2A;RAB27A;STAM2;CHMP5
regulation of mitotic spindle assembly (GO:1901673)	7	8.78951e-05	24.1107	PDCD6IP;VPS4B;CHMP1B;CHMP2B;CHMP2A;CHMP5;HSPA1A
regulation of spindle assembly (GO:0090169)	7	0.000467923	16.0689	PDCD6IP;VPS4B;CHMP1B;CHMP2B;CHMP2A;CHMP5;HSPA1A
multivesicular body assembly (GO:0036258)	7	0.00108697	12.5724	PDCD6IP;VPS4B;CHMP1B;CHMP2B;CHMP2A;STAM2;CHMP5
regulation of mitotic spindle organization (GO:0060236)	7	0.00247553	10.3247	PDCD6IP;VPS4B;CHMP1B;CHMP2B;CHMP2A;CHMP5;HSPA1A
nuclear membrane reassembly (GO:0031468)	7	0.0312079	6.14488	POM121;SPAST;UBXN2B;CHMP2B;CHMP2A;RANGAP1;LBR
regulation of tumor necrosis factor-mediated signaling pathway (GO:0010803)	7	0.0403895	5.66176	SPHK1;SPPL2A;CASP4;MADD;CASP1;TAX1BP1;HSPA1A
midbody abscission (GO:0061952)	6	0.000467923	22.4986	PDCD6IP;VPS4B;CHMP1B;CHMP2B;CHMP2A;CHMP5
mitotic cytokinetic process (GO:1902410)	6	0.00108697	17.6747	PDCD6IP;VPS4B;CHMP1B;CHMP2B;CHMP2A;CHMP5
regulation of centrosome cycle (GO:0046605)	6	0.00181986	15.4638	PDCD6IP;VPS4B;CHMP1B;CHMP2B;CHMP2A;CHMP5
endosome transport via multivesicular body sorting pathway (GO:0032509)	6	0.00316077	13.0201	SORT1;VPS4B;CHMP1B;CHMP2B;CHMP2A;CHMP5
regulation of centrosome duplication (GO:0010824)	6	0.0132924	9.5113	PDCD6IP;VPS4B;CHMP1B;CHMP2B;CHMP2A;CHMP5
lysosome organization (GO:0007040)	6	0.0296266	7.72555	SNAPIN;GNPTAB;AKTIP;HPS1;TPP1;TMEM165
endosome organization (GO:0007032)	6	0.0386879	7.06228	SNX3;AKTIP;CHMP2B;RAB27A;SNX10;CORO1C
ESCRT complex disassembly (GO:1904896)	5	0.000467923	41.173	CHMP1B;VPS4B;CHMP2B;CHMP2A;CHMP5
ESCRT III complex disassembly (GO:1904903)	5	0.000467923	41.173	CHMP1B;VPS4B;CHMP2B;CHMP2A;CHMP5
regulation of stress-activated protein kinase signaling cascade (GO:0070302)	5	0.000744286	34.3091	LYN;MAP2K1;NBR1;FAS;MAPK1
positive regulation of exosomal secretion (GO:1903543)	4	0.0357718	14.9359	SDCBP;PDCD6IP;VPS4B;CHMP2A
membrane fission (GO:0090148)	3	0.0403895	30.7516	SH3GLB1;SPAST;CORO1C
