# Supplementary material for: Blood Leukocyte Transcriptional Modules and Differentially Expressed Genes Associated with Disease Severity and Age in COVID-19 Patients
Source: Preprints.org preprint supplement (doi:10.20944/preprints202208.0181.v1), 2022-08-09
Supplement: Supplementary file 4 [file TableS6_Bando et al.xlsx]

## Sheet: Magenta-WikiPathway_2021_Human_
Term	Overlap	P-value	Adjusted P-value	Old P-value	Old Adjusted P-value	Odds Ratio	Combined Score	Genes
Modulators of TCR signaling and T cell activation WP5072	1961-04-01	0.00105617	0.0787107	0	0	9.71464	66.5754	IKBKB;RASA2;PCBP2;NFKB1
Canonical NF-KB pathway WP4562	2021-02-08	0.00145939	0.0787107	0	0	45.6253	297.921	IKBKB;NFKB1
Supression of HMGB1 mediated inflammation by THBD WP4479	2021-02-09	0.00186733	0.0787107	0	0	39.1054	245.709	IKBKB;NFKB1
Role of Altered Glycolysation of MUC1 in Tumour Microenvironment WP4480	2021-02-09	0.00186733	0.0787107	0	0	39.1054	245.709	IKBKB;NFKB1
Degradation pathway of sphingolipids, including diseases WP4153	2021-02-10	0.00232292	0.0787107	0	0	34.2155	207.515	GLB1;HEXB
Autosomal recessive Osteopetrosis pathways WP4788	2021-02-11	0.00282547	0.0787107	0	0	30.4123	178.492	IKBKB;NFKB1
Glycogen Synthesis and Degradation WP500	1940-03-01	0.00314962	0.0787107	0	0	11.1577	64.2734	PPP2CA;PPP2CB;CALM1
MAPK and NFkB signaling pathways inhibited by Yersinia YopJ WP3849	2021-02-12	0.00337426	0.0787107	0	0	27.3697	155.777	IKBKB;NFKB1
Fibrin Complement Receptor 3 Signaling Pathway WP4136	1941-03-01	0.00338014	0.0787107	0	0	10.8635	61.8115	IKBKB;RASSF5;NFKB1
MicroRNAs in cardiomyocyte hypertrophy WP1544	1984-04-01	0.00342879	0.0787107	0	0	6.91364	39.2387	IKBKB;PPP3CB;CALM1;NFKB1
Dopamine metabolism WP2436	2021-02-13	0.0039686	0.0787107	0	0	24.8803	137.571	PPP2CA;PPP2CB
Osteopontin Signaling WP1434	2021-02-13	0.0039686	0.0787107	0	0	24.8803	137.571	IKBKB;NFKB1
Exercise-induced Circadian Regulation WP410	1948-03-01	0.00528307	0.0967207	0	0	9.17037	48.0825	PPP2CB;ZFR;EIF4G2
Glycosaminoglycan degradation WP4815	2021-02-17	0.00678776	0.115392	0	0	18.2418	91.0748	GLB1;HEXB
Cardiac Hypertrophic Response WP2795	1955-03-01	0.00772011	0.121668	0	0	7.93309	38.586	IKBKB;CALM1;NFKB1
MAPK Signaling Pathway WP382	6/246	0.00977659	0.121668	0	0	3.47748	16.093	IKBKB;PPP3CB;RASA2;NFKB1;CRKL;TGFBR2
T-Cell antigen Receptor (TCR) pathway during Staphylococcus aureus infection WP3863	1962-03-01	0.0107227	0.121668	0	0	6.98941	31.6997	IKBKB;CALM1;NFKB1
Proteasome Degradation WP183	1962-03-01	0.0107227	0.121668	0	0	6.98941	31.6997	PSMD10;PSMB2;PSMC1
STING pathway in Kawasaki-like disease and COVID-19 WP4961	2021-02-22	0.0112559	0.121668	0	0	13.6779	61.371	IKBKB;NFKB1
Vitamin D in inflammatory diseases WP4482	2021-02-22	0.0112559	0.121668	0	0	13.6779	61.371	IKBKB;NFKB1
Methionine De Novo and Salvage Pathway WP3580	2021-02-22	0.0112559	0.121668	0	0	13.6779	61.371	SMS;MAT2B
Ras signaling WP4223	5/184	0.0116767	0.121668	0	0	3.87009	17.2225	IKBKB;RASSF5;RASA2;CALM1;NFKB1
Ebstein-Barr virus LMP1 signaling WP262	2021-02-23	0.012269	0.121668	0	0	13.0259	57.323	IKBKB;NFKB1
Estrogen signaling pathway WP712	2021-02-23	0.012269	0.121668	0	0	13.0259	57.323	IKBKB;NFKB1
PI3K-Akt signaling pathway WP4172	7/340	0.0129935	0.123698	0	0	2.93093	12.7299	IKBKB;RBL2;PPP2CA;PPP2CB;LAMA4;PPP2R2D;NFKB1
mRNA Processing WP411	4/126	0.0140513	0.127019	0	0	4.5239	19.2946	HNRNPK;PRMT2;PCBP2;DHX15
Physiological and pathological hypertrophy of the heart WP1528	2021-02-25	0.0144097	0.127019	0	0	11.8921	50.4206	PPP3CB;CALM1
16p11.2 proximal deletion syndrome WP4949	1974-03-01	0.0172471	0.137409	0	0	5.80458	23.5672	PPP2CA;PPP2CB;NFKB1
Cytosolic DNA-sensing pathway WP4655	1975-03-01	0.017871	0.137409	0	0	5.72367	23.0353	IKBKB;POLR3E;NFKB1
TLR4 Signaling and Tolerance WP3851	2021-02-28	0.0178978	0.137409	0	0	10.5183	42.3159	IKBKB;NFKB1
Interactions between immune cells and microRNAs in tumor microenvironment WP4559	2021-02-28	0.0178978	0.137409	0	0	10.5183	42.3159	NFKB1;TGFBR2
T-Cell Receptor and Co-stimulatory Signaling WP2583	2029-02-01	0.0191321	0.142295	0	0	10.1282	40.0712	CALM1;NFKB1
Toll-like Receptor Signaling related to MyD88 WP3858	1931-02-01	0.0217044	0.145247	0	0	9.42878	36.1145	IKBKB;NFKB1
IL17 signaling pathway WP2112	1932-02-01	0.0230413	0.145247	0	0	9.11402	34.3641	IKBKB;NFKB1
Initiation of transcription and translation elongation at the HIV-1 LTR WP3414	1932-02-01	0.0230413	0.145247	0	0	9.11402	34.3641	PPP3CB;NFKB1
Monoamine Transport WP727	1932-02-01	0.0230413	0.145247	0	0	9.11402	34.3641	RBL2;PPP2CB
Signal transduction through IL1R WP4496	1933-02-01	0.0244113	0.145247	0	0	8.81958	32.7445	IKBKB;NFKB1
Host-pathogen interaction of human coronaviruses - interferon induction WP4880	1933-02-01	0.0244113	0.145247	0	0	8.81958	32.7445	IKBKB;NFKB1
Prion disease pathway WP3995	1933-02-01	0.0244113	0.145247	0	0	8.81958	32.7445	SMC3;NFKB1
Resistin as a regulator of inflammation WP4481	1933-02-01	0.0244113	0.145247	0	0	8.81958	32.7445	IKBKB;NFKB1
Photodynamic therapy-induced NF-kB survival signaling WP3617	1935-02-01	0.0272485	0.153887	0	0	8.28422	29.846	IKBKB;NFKB1
Pancreatic adenocarcinoma pathway WP4263	1989-03-01	0.0279181	0.153887	0	0	4.78852	17.1356	IKBKB;NFKB1;TGFBR2
T-cell receptor (TCR) signaling pathway WP69	1990-03-01	0.0287294	0.153887	0	0	4.73324	16.8022	IKBKB;NFKB1;CRKL
Amino Acid metabolism WP3925	1991-03-01	0.0295532	0.153887	0	0	4.67921	16.4782	HIBADH;SMS;IARS
Melatonin metabolism and effects WP3298	1937-02-01	0.0302116	0.153887	0	0	7.81005	27.3315	CALM1;NFKB1
miRNAs involvement in the immune response in sepsis WP4329	1937-02-01	0.0302116	0.153887	0	0	7.81005	27.3315	IKBKB;NFKB1
TNF-alpha signaling pathway WP231	1992-03-01	0.0303894	0.153887	0	0	4.6264	16.1631	IKBKB;PPP2CA;NFKB1
Amyotrophic lateral sclerosis (ALS) WP2447	1938-02-01	0.031739	0.157373	0	0	7.59272	26.1965	PPP3CB;DERL1
Small cell lung cancer WP4658	1996-03-01	0.0338579	0.162787	0	0	4.42652	14.9864	IKBKB;LAMA4;NFKB1
B Cell Receptor Signaling Pathway WP23	1997-03-01	0.0347558	0.162787	0	0	4.37921	14.7116	IKBKB;NFKB1;CRKL
Oxidative Damage WP3941	1940-02-01	0.034883	0.162787	0	0	7.19238	24.1359	C5AR1;NFKB1
TNF related weak inducer of apoptosis (TWEAK) Signaling Pathway WP2036	1942-02-01	0.0381424	0.174575	0	0	6.83207	22.3165	IKBKB;NFKB1
Nephrotic syndrome WP4758	1945-02-01	0.0432393	0.194169	0	0	6.35445	19.9594	PDSS2;EMP2
NO/cGMP/PKG mediated Neuroprotection WP4008	1947-02-01	0.04677	0.206135	0	0	6.07142	18.5938	CALM1;NFKB1
Activation of NLRP3 Inflammasome by SARS-CoV-2 WP4876	2021-01-07	0.0503365	0.206824	0	0	22.6564	67.7205	NFKB1
LDLRAD4 and what we know about it WP4904	2021-01-07	0.0503365	0.206824	0	0	22.6564	67.7205	TGFBR2
Nanomaterial-induced inflammasome activation WP3890	2021-01-07	0.0503365	0.206824	0	0	22.6564	67.7205	NFKB1
Structural Pathway of Interleukin 1 (IL-1) WP2637	1949-02-01	0.0504026	0.206824	0	0	5.81247	17.366	IKBKB;NFKB1
TFs regulate miRNAs related to cardiac hypertrophy WP1559	2021-01-08	0.0573189	0.221617	0	0	19.4188	55.5207	NFKB1
Ketogenesis and Ketolysis WP4742	2021-01-08	0.0573189	0.221617	0	0	19.4188	55.5207	SLC25A20
Cell cycle WP179	3/120	0.058717	0.221617	0	0	3.51425	9.96298	RBL2;CDC6;SMC3
TGF-beta Receptor Signaling WP560	1954-02-01	0.0599054	0.221617	0	0	5.25225	14.785	NFKB1;TGFBR2
IL-4 signaling pathway WP395	1954-02-01	0.0599054	0.221617	0	0	5.25225	14.785	IKBKB;NFKB1
DNA IR-double strand breaks and cellular response via ATM WP3959	1955-02-01	0.0618747	0.221617	0	0	5.1529	14.3387	ACTL6A;SMC3
IL-1 signaling pathway WP195	1955-02-01	0.0618747	0.221617	0	0	5.1529	14.3387	IKBKB;NFKB1
RANKL/RANK signaling pathway WP2018	1955-02-01	0.0618747	0.221617	0	0	5.1529	14.3387	IKBKB;NFKB1
Somitogenesis in the context of spondylocostal dysostosis WP4785	2021-01-09	0.0642504	0.221617	0	0	16.9906	46.6386	LFNG
Methylation Pathways WP704	2021-01-09	0.0642504	0.221617	0	0	16.9906	46.6386	MAT2B
NLR Proteins WP288	2021-01-09	0.0642504	0.221617	0	0	16.9906	46.6386	IKBKB
TGF-beta receptor signaling in skeletal dysplasias WP4816	1958-02-01	0.0679121	0.22861	0	0	4.87611	13.1145	NFKB1;TGFBR2
Ebola Virus Pathway on Host WP4217	3/129	0.0697422	0.22861	0	0	3.26174	8.68585	AXL;RASA2;NFKB1
Aspirin and miRNAs WP4707	2021-01-10	0.0711312	0.22861	0	0	15.102	39.918	NFKB1
Trans-sulfuration pathway WP2333	2021-01-10	0.0711312	0.22861	0	0	15.102	39.918	MAT2B
Interleukin-1 Induced Activation of NF-kappa-B WP3656	2021-01-10	0.0711312	0.22861	0	0	15.102	39.918	NFKB1
Novel intracellular components of RIG-I-like receptor (RLR) pathway WP3865	1960-02-01	0.0720409	0.22861	0	0	4.70749	12.3832	IKBKB;NFKB1
Focal Adhesion-PI3K-Akt-mTOR-signaling pathway WP3932	5/303	0.073232	0.229332	0	0	2.31059	6.04017	IKBKB;PPP2CA;PPP2CB;LAMA4;PPP2R2D
Serotonin Transporter Activity WP1455	2021-01-11	0.0779618	0.231936	0	0	13.5911	34.6782	PPP2CB
Gene regulatory network modelling somitogenesis WP2854	2021-01-11	0.0779618	0.231936	0	0	13.5911	34.6782	LFNG
Methionine metabolism leading to sulfur amino acids and related disorders WP4292	2021-01-11	0.0779618	0.231936	0	0	13.5911	34.6782	MAT2B
NAD metabolism, sirtuins and aging WP3630	2021-01-11	0.0779618	0.231936	0	0	13.5911	34.6782	NFKB1
AGE/RAGE pathway WP2324	1966-02-01	0.0848904	0.248953	0	0	4.26487	10.5189	IKBKB;NFKB1
Endoderm differentiation WP2853	3/141	0.0857736	0.248953	0	0	2.9763	7.30992	MBTD1;BTAF1;FOXN3
RAC1/PAK1/p38/MMP2 Pathway WP3303	1968-02-01	0.0893176	0.253148	0	0	4.13521	9.98884	IKBKB;NFKB1
Brain-derived neurotrophic factor (BDNF) signaling pathway WP2380	3/144	0.0900066	0.253148	0	0	2.91253	7.013	IKBKB;PPP2CA;NFKB1
ncRNAs involved in STAT3 signaling in hepatocellular carcinoma WP4337	2021-01-13	0.0914737	0.253148	0	0	11.3248	27.0855	NFKB1
NO metabolism in cystic fibrosis WP4947	2021-01-13	0.0914737	0.253148	0	0	11.3248	27.0855	PRMT2
NRF2 pathway WP2884	3/146	0.0928765	0.253718	0	0	2.8715	6.82408	SLC39A6;SLC2A8;TGFBR2
Parkin-Ubiquitin Proteasomal System pathway WP2359	1970-02-01	0.0938119	0.253718	0	0	4.01318	9.49706	PSMD10;PSMC1
Non-genomic actions of 1,25 dihydroxyvitamin D3 WP4341	1971-02-01	0.0960832	0.256715	0	0	3.95482	9.26433	IKBKB;NFKB1
Cancer immunotherapy by CTLA4 blockade WP4582	2021-01-14	0.0981557	0.256715	0	0	10.4531	24.2638	PPP2CA
Riboflavin and CoQ disorders WP5037	2021-01-14	0.0981557	0.256715	0	0	10.4531	24.2638	PDSS2
Head and Neck Squamous Cell Carcinoma WP4674	1973-02-01	0.100673	0.260289	0	0	3.84303	8.82314	NFKB1;TGFBR2
Hepatitis B infection WP4666	3/152	0.10171	0.260289	0	0	2.75503	6.297	IKBKB;NFKB1;TGFBR2
Biomarkers for pyrimidine metabolism disorders WP4584	2021-01-15	0.104789	0.262524	0	0	9.70597	21.8948	DPYD
Regulation of sister chromatid separation at the metaphase-anaphase transition WP4240	2021-01-15	0.104789	0.262524	0	0	9.70597	21.8948	SMC3
Leptin signaling pathway WP2034	1976-02-01	0.107668	0.266928	0	0	3.68667	8.21648	IKBKB;NFKB1
Hedgehog Signaling Pathway Netpath WP47	2021-01-16	0.111374	0.270479	0	0	9.05845	19.8821	SAP18
ID signaling pathway WP53	2021-01-16	0.111374	0.270479	0	0	9.05845	19.8821	RBL2
Airway smooth muscle cell contraction WP4962	2021-01-17	0.11791	0.272453	0	0	8.49187	18.1542	CALM1
Canonical and non-canonical TGF-B signaling WP3874	2021-01-17	0.11791	0.272453	0	0	8.49187	18.1542	TGFBR2
Mitochondrial LC-Fatty Acid Beta-Oxidation WP368	2021-01-17	0.11791	0.272453	0	0	8.49187	18.1542	SLC25A20
nsp1 from SARS-CoV-2 inhibits translation initiation in the host cell WP5027	2021-01-17	0.11791	0.272453	0	0	8.49187	18.1542	EIF3I
Pyrimidine metabolism and related diseases WP4225	2021-01-17	0.11791	0.272453	0	0	8.49187	18.1542	DPYD
Chemokine signaling pathway WP3929	3/164	0.120324	0.275357	0	0	2.54814	5.39585	IKBKB;NFKB1;CRKL
Simplified Depiction of MYD88 Distinct Input-Output Pathway WP3877	2021-01-18	0.124399	0.279462	0	0	7.99194	16.6573	NFKB1
Alzheimer's disease WP2059	1983-02-01	0.124466	0.279462	0	0	3.36688	7.01564	PPP3CB;CALM1
Apoptosis WP254	1984-02-01	0.126915	0.282298	0	0	3.32565	6.86493	IKBKB;NFKB1
Pyrimidine metabolism WP4022	1985-02-01	0.129376	0.283091	0	0	3.28542	6.71878	DPYD;POLR3E
Apoptosis Modulation by HSP70 WP384	2021-01-19	0.130841	0.283091	0	0	7.54756	15.3501	NFKB1
LTF danger signal response pathway WP4478	2021-01-19	0.130841	0.283091	0	0	7.54756	15.3501	NFKB1
Retinoblastoma gene in cancer WP2446	1987-02-01	0.134331	0.288024	0	0	3.20779	6.43948	PRMT2;SMC3
Apoptosis Modulation and Signaling WP1772	1990-02-01	0.141841	0.301412	0	0	3.09796	6.05047	IKBKB;NFKB1
Urea cycle and metabolism of amino groups WP497	2021-01-21	0.143583	0.302413	0	0	6.79212	13.1825	SMS
Type II diabetes mellitus WP1584	2021-01-22	0.149884	0.30752	0	0	6.46836	12.2763	IKBKB
FGF23 signaling in hypophosphatemic rickets and related disorders WP4790	2021-01-22	0.149884	0.30752	0	0	6.46836	12.2763	NFKB1
miRNA targets in ECM and membrane receptors WP2911	2021-01-22	0.149884	0.30752	0	0	6.46836	12.2763	LAMA4
Cancer immunotherapy by PD-1 blockade WP4585	2021-01-23	0.156139	0.317616	0	0	6.17403	11.4652	NFKB1
Triacylglyceride synthesis WP325	2021-01-24	0.162349	0.324697	0	0	5.9053	10.7359	GNPAT
IL1 and megakaryocytes in obesity WP2865	2021-01-24	0.162349	0.324697	0	0	5.9053	10.7359	NFKB1
Hypothesized Pathways in Pathogenesis of Cardiovascular Disease WP3668	2021-01-25	0.168513	0.334217	0	0	5.65896	10.0772	TGFBR2
Wnt signaling pathway and pluripotency WP399	2/102	0.172687	0.339665	0	0	2.72455	4.78506	PPP2CA;PPP2CB
Toll-like Receptor Signaling Pathway WP75	2/103	0.175306	0.341991	0	0	2.69744	4.69684	IKBKB;NFKB1
FGFR3 signaling in chondrocyte proliferation and terminal differentiation WP4767	2021-01-27	0.180706	0.349659	0	0	5.22313	8.93616	PPP2CA
Thermogenesis WP4321	2/108	0.188495	0.360932	0	0	2.56955	4.28776	ACTL6A;SLC25A20
Gastric Cancer Network 1 WP2361	2021-01-29	0.192722	0.360932	0	0	4.84956	7.98483	ACTL6A
RAS and bradykinin pathways in COVID-19 WP4969	2021-01-29	0.192722	0.360932	0	0	4.84956	7.98483	NFKB1
DNA damage response (only ATM dependent) WP710	2/110	0.19381	0.360932	0	0	2.52171	4.13782	RBL2;NFKB1
Sphingolipid pathway WP1422	2021-01-30	0.198664	0.360932	0	0	4.6821	7.56693	PPP2CA
Extracellular vesicle-mediated signaling in recipient cells WP2870	2021-01-30	0.198664	0.360932	0	0	4.6821	7.56693	TGFBR2
Glycerophospholipid Biosynthetic Pathway WP2533	2021-01-30	0.198664	0.360932	0	0	4.6821	7.56693	GNPAT
One-carbon metabolism WP241	2021-01-30	0.198664	0.360932	0	0	4.6821	7.56693	MAT2B
Gastrin signaling pathway WP4659	2/114	0.204494	0.363328	0	0	2.43116	3.85877	IKBKB;NFKB1
Trans-sulfuration and one-carbon metabolism WP2525	2021-01-31	0.204563	0.363328	0	0	4.5258	7.1819	MAT2B
Tumor suppressor activity of SMARCB1 WP4204	2021-01-31	0.204563	0.363328	0	0	4.5258	7.1819	ACTL6A
Hair Follicle Development: Organogenesis - Part 2 of 3 WP2839	1932-01-01	0.210418	0.364986	0	0	4.37958	6.82628	NFKB1
SARS-CoV-2 mitochondrial interactions WP5038	1932-01-01	0.210418	0.364986	0	0	4.37958	6.82628	NFKB1
Ciliary landscape WP4352	3/216	0.212454	0.364986	0	0	1.92097	2.97564	GLB1;CALM1;NFKB1
Endothelin Pathways WP2197	1933-01-01	0.216231	0.364986	0	0	4.24251	6.49701	CALM1
Fluoropyrimidine Activity WP1601	1933-01-01	0.216231	0.364986	0	0	4.24251	6.49701	DPYD
miRNA regulation of prostate cancer signaling pathways WP3981	1933-01-01	0.216231	0.364986	0	0	4.24251	6.49701	NFKB1
Oxidative Stress WP408	1933-01-01	0.216231	0.364986	0	0	4.24251	6.49701	NFKB1
Signaling of Hepatocyte Growth Factor Receptor WP313	1934-01-01	0.222001	0.366919	0	0	4.11374	6.19148	CRKL
CAMKK2 Pathway WP4874	1934-01-01	0.222001	0.366919	0	0	4.11374	6.19148	CALM1
Fatty acid beta-oxidation WP143	1934-01-01	0.222001	0.366919	0	0	4.11374	6.19148	SLC25A20
The influence of laminopathies on Wnt signaling WP4844	1935-01-01	0.227729	0.37123	0	0	3.99255	5.90736	FNTA
Overview of leukocyte-intrinsic Hippo pathway functions WP4542	1935-01-01	0.227729	0.37123	0	0	3.99255	5.90736	RASSF5
Zinc homeostasis WP3529	1936-01-01	0.233415	0.377911	0	0	3.87828	5.64265	SLC39A6
Factors and pathways affecting insulin-like growth factor (IGF1)-Akt signaling WP3850	1937-01-01	0.23906	0.381854	0	0	3.77036	5.39554	NFKB1
Neovascularisation processes WP4331	1937-01-01	0.23906	0.381854	0	0	3.77036	5.39554	NFKB1
G13 Signaling Pathway WP524	1939-01-01	0.250225	0.394395	0	0	3.57156	4.94801	CALM1
Kisspeptin/kisspeptin receptor system in the ovary WP4871	1939-01-01	0.250225	0.394395	0	0	3.57156	4.94801	NFKB1
TGF-beta Signaling Pathway WP366	2/132	0.25319	0.395245	0	0	2.09263	2.87446	RBL2;TGFBR2
Ferroptosis WP4313	1940-01-01	0.255747	0.395245	0	0	3.4798	4.74494	PCBP2
PDGF Pathway WP2526	1940-01-01	0.255747	0.395245	0	0	3.4798	4.74494	NFKB1
Vitamin D-sensitive calcium signaling in depression WP4698	1941-01-01	0.261228	0.396671	0	0	3.39264	4.55414	ATP2B1
Nucleotide-binding Oligomerization Domain (NOD) pathway WP1433	1941-01-01	0.261228	0.396671	0	0	3.39264	4.55414	IKBKB
Splicing factor NOVA regulated synaptic proteins WP4148	1942-01-01	0.266669	0.396671	0	0	3.30972	4.37461	ATP2B1
Common Pathways Underlying Drug Addiction WP2636	1942-01-01	0.266669	0.396671	0	0	3.30972	4.37461	CALM1
DNA Replication WP466	1942-01-01	0.266669	0.396671	0	0	3.30972	4.37461	CDC6
IL-2 signaling pathway WP49	1942-01-01	0.266669	0.396671	0	0	3.30972	4.37461	CRKL
Eukaryotic Transcription Initiation WP405	1943-01-01	0.272071	0.399971	0	0	3.23076	4.20545	POLR3E
Regulation of toll-like receptor signaling pathway WP1449	2/139	0.272249	0.399971	0	0	1.985	2.58256	IKBKB;NFKB1
Interleukin-11 Signaling Pathway WP2332	1944-01-01	0.277432	0.402615	0	0	3.15546	4.04586	IKBKB
Renin-angiotensin-aldosterone system (RAAS) WP4756	1944-01-01	0.277432	0.402615	0	0	3.15546	4.04586	CALM1
ATM Signaling Network in Development and Disease WP3878	1945-01-01	0.282755	0.405396	0	0	3.08359	3.89512	NFKB1
Notch Signaling WP268	1945-01-01	0.282755	0.405396	0	0	3.08359	3.89512	LFNG
Aryl Hydrocarbon Receptor Netpath WP2586	1946-01-01	0.288039	0.410498	0	0	3.01492	3.75255	NFKB1
Thymic Stromal LymphoPoietin (TSLP) Signaling Pathway WP2203	1947-01-01	0.293284	0.411615	0	0	2.94923	3.61756	NFKB1
Energy Metabolism WP1541	1947-01-01	0.293284	0.411615	0	0	2.94923	3.61756	PPP3CB
Mesodermal commitment pathway WP2857	2/147	0.294011	0.411615	0	0	1.87472	2.29492	MBTD1;PPP2CA
Rett syndrome causing genes WP4312	1948-01-01	0.29849	0.415349	0	0	2.88633	3.48963	CECR2
Calcium Regulation in the Cardiac Cell WP536	2/150	0.302153	0.415349	0	0	1.83644	2.19789	ATP2B1;CALM1
Hepatitis C and Hepatocellular Carcinoma WP3646	1949-01-01	0.303659	0.415349	0	0	2.82606	3.36824	NFKB1
IL-3 signaling pathway WP286	1949-01-01	0.303659	0.415349	0	0	2.82606	3.36824	CRKL
Integrated breast cancer pathway WP1984	2/152	0.307572	0.417567	0	0	1.81177	2.13616	NFKB1;TGFBR2
Vitamin B12 metabolism WP1533	1950-01-01	0.308789	0.417567	0	0	2.76824	3.25295	NFKB1
Nonalcoholic fatty liver disease WP4396	2/155	0.315686	0.421321	0	0	1.77597	2.04771	IKBKB;NFKB1
Myometrial relaxation and contraction pathways WP289	2/156	0.318386	0.421321	0	0	1.76435	2.01929	CALM1;NFKB1
Translation Factors WP107	1952-01-01	0.318938	0.421321	0	0	2.65941	3.03907	EIF3I
IL-18 signaling pathway WP4754	3/272	0.323085	0.421321	0	0	1.51673	1.71366	IKBKB;FOXN3;NFKB1
Sudden Infant Death Syndrome (SIDS) Susceptibility Pathways WP706	2/158	0.323779	0.421321	0	0	1.74156	1.96394	HTR3A;NFKB1
Apoptosis-related network due to altered Notch3 in ovarian cancer WP2864	1953-01-01	0.323957	0.421321	0	0	2.60814	2.93975	NFKB1
Phosphodiesterases in neuronal function WP4222	1953-01-01	0.323957	0.421321	0	0	2.60814	2.93975	PDE6D
Interferon type I signaling pathways WP585	1954-01-01	0.328939	0.423461	0	0	2.5588	2.84508	CRKL
Epithelial to mesenchymal transition in colorectal cancer WP4239	2/160	0.329161	0.423461	0	0	1.71934	1.91054	GDF15;TGFBR2
The Overlap Between Signal Transduction Pathways that Contribute to a Range of LMNA Laminopathies WP4879	1955-01-01	0.333885	0.427229	0	0	2.51129	2.75478	FNTA
Complement and Coagulation Cascades WP558	1958-01-01	0.348506	0.443553	0	0	2.37876	2.50745	C5AR1
Kit receptor signaling pathway WP304	1959-01-01	0.353308	0.444907	0	0	2.33762	2.4321	CRKL
MET in type 1 papillary renal cell carcinoma WP4205	1959-01-01	0.353308	0.444907	0	0	2.33762	2.4321	CRKL
TYROBP causal network in microglia WP3945	1961-01-01	0.362808	0.44973	0	0	2.25947	2.29084	DPYD
Notch Signaling Pathway Netpath WP61	1961-01-01	0.362808	0.44973	0	0	2.25947	2.29084	NFKB1
Prader-Willi and Angelman Syndrome WP3998	1961-01-01	0.362808	0.44973	0	0	2.25947	2.29084	CDC6
Genotoxicity pathway WP4286	1963-01-01	0.372169	0.456578	0	0	2.18637	2.16102	TM7SF3
Lung fibrosis WP3624	1963-01-01	0.372169	0.456578	0	0	2.18637	2.16102	PARN
Endochondral Ossification with Skeletal Dysplasias WP4808	1964-01-01	0.376798	0.457001	0	0	2.15155	2.10002	CALM1
Endochondral Ossification WP474	1964-01-01	0.376798	0.457001	0	0	2.15155	2.10002	CALM1
Oncostatin M Signaling Pathway WP2374	1965-01-01	0.381393	0.457001	0	0	2.11783	2.04143	NFKB1
Pathways affected in adenoid cystic carcinoma WP3651	1965-01-01	0.381393	0.457001	0	0	2.11783	2.04143	ARID4B
Association Between Physico-Chemical Features and Toxicity Associated Pathways WP3680	1966-01-01	0.385955	0.457001	0	0	2.08514	1.98513	PPP2CA
Thyroid stimulating hormone (TSH) signaling pathway WP2032	1966-01-01	0.385955	0.457001	0	0	2.08514	1.98513	RBL2
SARS-CoV-2 innate immunity evasion and cell-specific immune response WP5039	1966-01-01	0.385955	0.457001	0	0	2.08514	1.98513	NFKB1
p53 transcriptional gene network WP4963	1967-01-01	0.390483	0.460074	0	0	2.05345	1.931	CCNG1
VEGFA-VEGFR2 Signaling Pathway WP3888	4/432	0.392502	0.460174	0	0	1.26952	1.18728	PPP2CA;DHX29;NFKB1;EIF4G2
Melanoma WP4685	1968-01-01	0.394978	0.460807	0	0	2.02269	1.87893	CALM1
Folate Metabolism WP176	1969-01-01	0.39944	0.46374	0	0	1.99285	1.82882	NFKB1
miRNA regulation of DNA damage response WP1530	1971-01-01	0.408266	0.469886	0	0	1.93571	1.73408	CCNG1
MECP2 and Associated Rett Syndrome WP3584	1972-01-01	0.412631	0.469886	0	0	1.90835	1.68928	SMC3
Non-small cell lung cancer WP4255	1972-01-01	0.412631	0.469886	0	0	1.90835	1.68928	RASSF5
Primary focal segmental glomerulosclerosis (FSGS) WP2572	1972-01-01	0.412631	0.469886	0	0	1.90835	1.68928	MKI67
Nuclear Receptors Meta-Pathway WP2882	3/319	0.416815	0.470319	0	0	1.28804	1.12718	SLC39A6;SLC2A8;TGFBR2
Chromosomal and microsatellite instability in colorectal cancer WP4216	1973-01-01	0.416964	0.470319	0	0	1.88175	1.64608	TGFBR2
Peptide GPCRs WP24	1974-01-01	0.421265	0.472929	0	0	1.85588	1.6044	C5AR1
Focal Adhesion WP306	2/198	0.428433	0.475748	0	0	1.38332	1.17253	LAMA4;CRKL
Joubert Syndrome WP4656	1976-01-01	0.429772	0.475748	0	0	1.80621	1.52534	PDE6D
Prolactin Signaling Pathway WP2037	1976-01-01	0.429772	0.475748	0	0	1.80621	1.52534	NFKB1
EGFR Tyrosine Kinase Inhibitor Resistance WP4806	1984-01-01	0.462579	0.509693	0	0	1.63146	1.25775	AXL
Pathways in clear cell renal cell carcinoma WP4018	1985-01-01	0.466545	0.511695	0	0	1.61195	1.22895	SDSL
Acute viral myocarditis WP4298	1986-01-01	0.470483	0.513647	0	0	1.59291	1.20105	EIF4G2
Selenium Micronutrient Network WP15	1989-01-01	0.482124	0.523952	0	0	1.53837	1.12233	NFKB1
ErbB signaling pathway WP673	1991-01-01	0.489742	0.527415	0	0	1.50403	1.07369	CRKL
GPCRs, Other WP117	1991-01-01	0.489742	0.527415	0	0	1.50403	1.07369	TAAR2
Corticotropin-releasing hormone signaling pathway WP2355	1993-01-01	0.49725	0.530697	0	0	1.47119	1.02786	NFKB1
G Protein Signaling Pathways WP35	1993-01-01	0.49725	0.530697	0	0	1.47119	1.02786	CALM1
LncRNA involvement in canonical Wnt signaling and colorectal cancer WP4258	1994-01-01	0.500962	0.532272	0	0	1.4553	1.00594	HNRNPK
Complement system WP2806	1997-01-01	0.511937	0.541516	0	0	1.4096	0.943805	C5AR1
Neural Crest Differentiation WP2064	1/101	0.526198	0.554138	0	0	1.35295	0.868696	NFKB1
7q11.23 copy number variation syndrome WP4932	1/104	0.536622	0.562625	0	0	1.31334	0.817504	UBE2E3
Wnt signaling WP428	1/115	0.572929	0.598058	0	0	1.18595	0.660567	PPP3CB
Spinal Cord Injury WP2431	1/118	0.582331	0.605218	0	0	1.15537	0.624726	CCNG1
Adipogenesis WP236	1/130	0.617927	0.63942	0	0	1.04725	0.504132	RBL2
22q11.2 copy number variation syndrome WP4657	1/131	0.620754	0.639565	0	0	1.03915	0.495486	CRKL
Ectoderm Differentiation WP2858	1/138	0.639967	0.656518	0	0	0.985701	0.439957	GLB1
Regulation of Actin Cytoskeleton WP51	1/150	0.670681	0.685073	0	0	0.905764	0.361819	FGD1
Insulin Signaling WP481	1/160	0.694277	0.706145	0	0	0.848367	0.309556	IKBKB
EGF/EGFR signaling pathway WP437	1/162	0.69879	0.707711	0	0	0.837744	0.300251	CRKL
Vitamin D Receptor Pathway WP2877	1/182	0.740441	0.745499	0	0	0.744418	0.223705	ATP2B1
Ciliopathies WP4803	1/183	0.742366	0.745499	0	0	0.740291	0.220542	PDE6D
GPCRs, Class A Rhodopsin-like WP455	1/257	0.851653	0.851653	0	0	0.52432	0.0841933	RABGAP1

## Sheet: Wiki-p<01
Term	Overlap	P-value	Adjusted P-value	Old P-value	Old Adjusted P-value	Odds Ratio	Combined Score	Genes
Modulators of TCR signaling and T cell activation WP5072	1961-04-01	0.00105617	0.0787107	0	0	9.71464	66.5754	IKBKB;RASA2;PCBP2;NFKB1
Canonical NF-KB pathway WP4562	2021-02-08	0.00145939	0.0787107	0	0	45.6253	297.921	IKBKB;NFKB1
Supression of HMGB1 mediated inflammation by THBD WP4479	2021-02-09	0.00186733	0.0787107	0	0	39.1054	245.709	IKBKB;NFKB1
Role of Altered Glycolysation of MUC1 in Tumour Microenvironment WP4480	2021-02-09	0.00186733	0.0787107	0	0	39.1054	245.709	IKBKB;NFKB1
Degradation pathway of sphingolipids, including diseases WP4153	2021-02-10	0.00232292	0.0787107	0	0	34.2155	207.515	GLB1;HEXB
Autosomal recessive Osteopetrosis pathways WP4788	2021-02-11	0.00282547	0.0787107	0	0	30.4123	178.492	IKBKB;NFKB1
Glycogen Synthesis and Degradation WP500	1940-03-01	0.00314962	0.0787107	0	0	11.1577	64.2734	PPP2CA;PPP2CB;CALM1
MAPK and NFkB signaling pathways inhibited by Yersinia YopJ WP3849	2021-02-12	0.00337426	0.0787107	0	0	27.3697	155.777	IKBKB;NFKB1
Fibrin Complement Receptor 3 Signaling Pathway WP4136	1941-03-01	0.00338014	0.0787107	0	0	10.8635	61.8115	IKBKB;RASSF5;NFKB1
MicroRNAs in cardiomyocyte hypertrophy WP1544	1984-04-01	0.00342879	0.0787107	0	0	6.91364	39.2387	IKBKB;PPP3CB;CALM1;NFKB1
Dopamine metabolism WP2436	2021-02-13	0.0039686	0.0787107	0	0	24.8803	137.571	PPP2CA;PPP2CB
Osteopontin Signaling WP1434	2021-02-13	0.0039686	0.0787107	0	0	24.8803	137.571	IKBKB;NFKB1
Exercise-induced Circadian Regulation WP410	1948-03-01	0.00528307	0.0967207	0	0	9.17037	48.0825	PPP2CB;ZFR;EIF4G2
Glycosaminoglycan degradation WP4815	2021-02-17	0.00678776	0.115392	0	0	18.2418	91.0748	GLB1;HEXB
Cardiac Hypertrophic Response WP2795	1955-03-01	0.00772011	0.121668	0	0	7.93309	38.586	IKBKB;CALM1;NFKB1
MAPK Signaling Pathway WP382	6/246	0.00977659	0.121668	0	0	3.47748	16.093	IKBKB;PPP3CB;RASA2;NFKB1;CRKL;TGFBR2
T-Cell antigen Receptor (TCR) pathway during Staphylococcus aureus infection WP3863	1962-03-01	0.0107227	0.121668	0	0	6.98941	31.6997	IKBKB;CALM1;NFKB1
Proteasome Degradation WP183	1962-03-01	0.0107227	0.121668	0	0	6.98941	31.6997	PSMD10;PSMB2;PSMC1
STING pathway in Kawasaki-like disease and COVID-19 WP4961	2021-02-22	0.0112559	0.121668	0	0	13.6779	61.371	IKBKB;NFKB1
Vitamin D in inflammatory diseases WP4482	2021-02-22	0.0112559	0.121668	0	0	13.6779	61.371	IKBKB;NFKB1
Methionine De Novo and Salvage Pathway WP3580	2021-02-22	0.0112559	0.121668	0	0	13.6779	61.371	SMS;MAT2B
Ras signaling WP4223	5/184	0.0116767	0.121668	0	0	3.87009	17.2225	IKBKB;RASSF5;RASA2;CALM1;NFKB1
Ebstein-Barr virus LMP1 signaling WP262	2021-02-23	0.012269	0.121668	0	0	13.0259	57.323	IKBKB;NFKB1
Estrogen signaling pathway WP712	2021-02-23	0.012269	0.121668	0	0	13.0259	57.323	IKBKB;NFKB1
PI3K-Akt signaling pathway WP4172	7/340	0.0129935	0.123698	0	0	2.93093	12.7299	IKBKB;RBL2;PPP2CA;PPP2CB;LAMA4;PPP2R2D;NFKB1
mRNA Processing WP411	4/126	0.0140513	0.127019	0	0	4.5239	19.2946	HNRNPK;PRMT2;PCBP2;DHX15
Physiological and pathological hypertrophy of the heart WP1528	2021-02-25	0.0144097	0.127019	0	0	11.8921	50.4206	PPP3CB;CALM1
16p11.2 proximal deletion syndrome WP4949	1974-03-01	0.0172471	0.137409	0	0	5.80458	23.5672	PPP2CA;PPP2CB;NFKB1
Cytosolic DNA-sensing pathway WP4655	1975-03-01	0.017871	0.137409	0	0	5.72367	23.0353	IKBKB;POLR3E;NFKB1
TLR4 Signaling and Tolerance WP3851	2021-02-28	0.0178978	0.137409	0	0	10.5183	42.3159	IKBKB;NFKB1
Interactions between immune cells and microRNAs in tumor microenvironment WP4559	2021-02-28	0.0178978	0.137409	0	0	10.5183	42.3159	NFKB1;TGFBR2
T-Cell Receptor and Co-stimulatory Signaling WP2583	2029-02-01	0.0191321	0.142295	0	0	10.1282	40.0712	CALM1;NFKB1

## Sheet: Table S6
Table S6. Enrichment analyses for the magenta module. Terms that appear in the histogram (Figure 7) are highlighted in grey. In bold, HH genes
Term (KEGG-2021)	Nº genes	Adjusted p-value	Odds Ratio	Genes
Human papillomavirus infection	9	0.0363573	3.95578	LFNG;IKBKB;RBL2;PPP2CA;PPP2CB;LAMA4;PSMC1;PPP2R2D;NFKB1
Chagas disease	6	0.0198532	8.75754	IKBKB;PPP2CA;PPP2CB;PPP2R2D;NFKB1;TGFBR2
Cellular senescence	6	0.0387484	5.5895	RBL2;PPP3CB;RASSF5;CALM1;NFKB1;TGFBR2
mRNA surveillance pathway	5	0.0363573	7.48145	PPP2CA;PPP2CB;PPP2R2D;SAP18;GSPT1
Terpenoid backbone biosynthesis	3	0.0363573	21.7478	NUS1;FNTA;PDSS2
Term (Reactome-2016)	Nº genes	Adjusted p-value	Odds Ratio	Genes
Gene Expression Homo sapiens R-HSA-74160	25	0.0127668	2.32823	PSMD10;SLBP;ZNF791;PARN;ARID4B;PPP2CA;PPP2CB;PSMB2;SAP30L;PCBP2;SAP18;IARS2;UTP6;KIAA0391;WDR77;RBL2;HNRNPK;XPOT;EIF3I;PSMC1;CCNG1;POLR3E;IARS;CNOT8;ZNF333
Innate Immune System Homo sapiens R-HSA-168249	14	0.0228723	2.53003	PSMD10;FCN3;C5AR1;NFKB1;IKBKB;PPP2CA;PPP2CB;PPP3CB;PSMB2;PSMC1;PCBP2;RASA2;POLR3E;CALM1
Cell Cycle, Mitotic Homo sapiens R-HSA-69278	12	0.00887571	3.83269	PSMD10;RBL2;PPP2CA;PPP2CB;ANKLE2;PSMB2;ZWILCH;PSMC1;USO1;PPP2R2D;CDC6;SMC3
Cell Cycle Homo sapiens R-HSA-1640170	12	0.0195669	3.09651	PSMD10;RBL2;PPP2CA;PPP2CB;ANKLE2;PSMB2;ZWILCH;PSMC1;USO1;PPP2R2D;CDC6;SMC3
Signalling by NGF Homo sapiens R-HSA-166520	11	0.0146625	3.57688	PSMD10;IKBKB;PPP2CA;PPP2CB;PSMB2;PSMC1;RASA2;CALM1;NFKB1;FGD1;CRKL
Cytokine Signaling in Immune system Homo sapiens R-HSA-1280215	11	0.0261784	2.55583	PSMD10;IKBKB;PPP2CA;PPP2CB;PSMB2;PSMC1;RASA2;CALM1;NFKB1;EIF4G2;CRKL
M Phase Homo sapiens R-HSA-68886	10	0.0035446	5.54377	PSMD10;PPP2CA;PPP2CB;ANKLE2;PSMB2;ZWILCH;PSMC1;USO1;PPP2R2D;SMC3
Signaling by Interleukins Homo sapiens R-HSA-449147	10	0.0162699	3.72053	PSMD10;IKBKB;PPP2CA;PPP2CB;PSMB2;PSMC1;RASA2;CALM1;NFKB1;CRKL
Fc epsilon receptor (FCERI) signaling Homo sapiens R-HSA-2454202	10	0.0162699	3.69097	PSMD10;IKBKB;PPP2CA;PPP2CB;PPP3CB;PSMB2;PSMC1;RASA2;CALM1;NFKB1
Mitotic Anaphase Homo sapiens R-HSA-68882	8	0.0035446	6.86741	PSMD10;PPP2CA;PPP2CB;ANKLE2;PSMB2;ZWILCH;PSMC1;SMC3
Mitotic Metaphase and Anaphase Homo sapiens R-HSA-2555396	8	0.0035446	6.82569	PSMD10;PPP2CA;PPP2CB;ANKLE2;PSMB2;ZWILCH;PSMC1;SMC3
Signaling by the B Cell Receptor (BCR) Homo sapiens R-HSA-983705	8	0.0127668	5.02075	PSMD10;IKBKB;PPP2CA;PPP2CB;PSMB2;PSMC1;CALM1;NFKB1
Frs2-mediated activation Homo sapiens R-HSA-170968	8	0.0139767	4.86753	PSMD10;PPP2CA;PPP2CB;PSMB2;PSMC1;RASA2;CALM1;CRKL
Prolonged ERK activation events Homo sapiens R-HSA-169893	8	0.0139767	4.82543	PSMD10;PPP2CA;PPP2CB;PSMB2;PSMC1;RASA2;CALM1;CRKL
Signalling to ERKs Homo sapiens R-HSA-187687	8	0.0151708	4.6062	PSMD10;PPP2CA;PPP2CB;PSMB2;PSMC1;RASA2;CALM1;CRKL
Interleukin-3, 5 and GM-CSF signaling Homo sapiens R-HSA-512988	8	0.0162699	4.45873	PSMD10;PPP2CA;PPP2CB;PSMB2;PSMC1;RASA2;CALM1;CRKL
VEGFA-VEGFR2 Pathway Homo sapiens R-HSA-4420097	8	0.0228723	3.60469	PSMD10;PPP2CA;PPP2CB;PSMB2;AXL;PSMC1;RASA2;CALM1
Signaling by VEGF Homo sapiens R-HSA-194138	8	0.0237693	3.51313	PSMD10;PPP2CA;PPP2CB;PSMB2;AXL;PSMC1;RASA2;CALM1
Downstream signal transduction Homo sapiens R-HSA-186763	8	0.0248315	3.37373	PSMD10;PPP2CA;PPP2CB;PSMB2;PSMC1;RASA2;CALM1;CRKL
Signaling by PDGF Homo sapiens R-HSA-186797	8	0.0261572	3.15205	PSMD10;PPP2CA;PPP2CB;PSMB2;PSMC1;RASA2;CALM1;CRKL
NGF signalling via TRKA from the plasma membrane Homo sapiens R-HSA-187037	8	0.0268208	3.06436	PSMD10;PPP2CA;PPP2CB;PSMB2;PSMC1;RASA2;CALM1;CRKL
CLEC7A (Dectin-1) signaling Homo sapiens R-HSA-5607764	7	0.0035446	10.7397	PSMD10;IKBKB;PPP3CB;PSMB2;PSMC1;CALM1;NFKB1
C-type lectin receptors (CLRs) Homo sapiens R-HSA-5621481	7	0.0035446	8.50733	PSMD10;IKBKB;PPP3CB;PSMB2;PSMC1;CALM1;NFKB1
Mitotic G1-G1/S phases Homo sapiens R-HSA-453279	7	0.00458652	7.64496	PSMD10;RBL2;PPP2CA;PPP2CB;PSMB2;PSMC1;CDC6
Separation of Sister Chromatids Homo sapiens R-HSA-2467813	7	0.00911039	6.35419	PSMD10;PPP2CA;PPP2CB;PSMB2;ZWILCH;PSMC1;SMC3
Downstream signaling events of B Cell Receptor (BCR) Homo sapiens R-HSA-1168372	7	0.0151708	5.31568	PSMD10;IKBKB;PPP2CA;PPP2CB;PSMB2;PSMC1;NFKB1
GRB2 events in EGFR signaling Homo sapiens R-HSA-179812	7	0.0213309	4.30373	PSMD10;PPP2CA;PPP2CB;PSMB2;PSMC1;RASA2;CALM1
SHC1 events in EGFR signaling Homo sapiens R-HSA-180336	7	0.0213309	4.30373	PSMD10;PPP2CA;PPP2CB;PSMB2;PSMC1;RASA2;CALM1
SOS-mediated signalling Homo sapiens R-HSA-112412	7	0.0213309	4.30373	PSMD10;PPP2CA;PPP2CB;PSMB2;PSMC1;RASA2;CALM1
SHC1 events in ERBB4 signaling Homo sapiens R-HSA-1250347	7	0.0213309	4.30373	PSMD10;PPP2CA;PPP2CB;PSMB2;PSMC1;RASA2;CALM1
RAF/MAP kinase cascade Homo sapiens R-HSA-5673001	7	0.0213309	4.30373	PSMD10;PPP2CA;PPP2CB;PSMB2;PSMC1;RASA2;CALM1
FRS-mediated FGFR2 signaling Homo sapiens R-HSA-5654700	7	0.0213309	4.28472	PSMD10;PPP2CA;PPP2CB;PSMB2;PSMC1;RASA2;CALM1
FRS-mediated FGFR4 signaling Homo sapiens R-HSA-5654712	7	0.0213309	4.28472	PSMD10;PPP2CA;PPP2CB;PSMB2;PSMC1;RASA2;CALM1
FRS-mediated FGFR3 signaling Homo sapiens R-HSA-5654706	7	0.0213309	4.28472	PSMD10;PPP2CA;PPP2CB;PSMB2;PSMC1;RASA2;CALM1
FRS-mediated FGFR1 signaling Homo sapiens R-HSA-5654693	7	0.0213309	4.28472	PSMD10;PPP2CA;PPP2CB;PSMB2;PSMC1;RASA2;CALM1
ARMS-mediated activation Homo sapiens R-HSA-170984	7	0.0213309	4.22866	PSMD10;PPP2CA;PPP2CB;PSMB2;PSMC1;RASA2;CALM1
Signalling to p38 via RIT and RIN Homo sapiens R-HSA-187706	7	0.0213309	4.22866	PSMD10;PPP2CA;PPP2CB;PSMB2;PSMC1;RASA2;CALM1
MAPK1/MAPK3 signaling Homo sapiens R-HSA-5684996	7	0.0217563	4.19209	PSMD10;PPP2CA;PPP2CB;PSMB2;PSMC1;RASA2;CALM1
Signaling by Leptin Homo sapiens R-HSA-2586552	7	0.0217563	4.15614	PSMD10;PPP2CA;PPP2CB;PSMB2;PSMC1;RASA2;CALM1
Interleukin receptor SHC signaling Homo sapiens R-HSA-912526	7	0.0217563	4.1208	PSMD10;PPP2CA;PPP2CB;PSMB2;PSMC1;RASA2;CALM1
Signalling to RAS Homo sapiens R-HSA-167044	7	0.0217563	4.10335	PSMD10;PPP2CA;PPP2CB;PSMB2;PSMC1;RASA2;CALM1
VEGFR2 mediated cell proliferation Homo sapiens R-HSA-5218921	7	0.0223146	4.06888	PSMD10;PPP2CA;PPP2CB;PSMB2;PSMC1;RASA2;CALM1
Interleukin-2 signaling Homo sapiens R-HSA-451927	7	0.023084	4.00163	PSMD10;PPP2CA;PPP2CB;PSMB2;PSMC1;RASA2;CALM1
NCAM signaling for neurite out-growth Homo sapiens R-HSA-375165	7	0.0240852	3.78263	PSMD10;PPP2CA;PPP2CB;PSMB2;PSMC1;RASA2;CALM1
MAPK family signaling cascades Homo sapiens R-HSA-5683057	7	0.0261572	3.53357	PSMD10;PPP2CA;PPP2CB;PSMB2;PSMC1;RASA2;CALM1
IRS-mediated signalling Homo sapiens R-HSA-112399	7	0.0261572	3.53357	PSMD10;PPP2CA;PPP2CB;PSMB2;PSMC1;RASA2;CALM1
Insulin receptor signalling cascade Homo sapiens R-HSA-74751	7	0.0261572	3.49518	PSMD10;PPP2CA;PPP2CB;PSMB2;PSMC1;RASA2;CALM1
IGF1R signaling cascade Homo sapiens R-HSA-2428924	7	0.0261572	3.48256	PSMD10;PPP2CA;PPP2CB;PSMB2;PSMC1;RASA2;CALM1
Signaling by Type 1 Insulin-like Growth Factor 1 Receptor (IGF1R) Homo sapiens R-HSA-2404192	7	0.0261572	3.48256	PSMD10;PPP2CA;PPP2CB;PSMB2;PSMC1;RASA2;CALM1
IRS-related events triggered by IGF1R Homo sapiens R-HSA-2428928	7	0.0261572	3.48256	PSMD10;PPP2CA;PPP2CB;PSMB2;PSMC1;RASA2;CALM1
FCERI mediated MAPK activation Homo sapiens R-HSA-2871796	7	0.0261572	3.47004	PSMD10;PPP2CA;PPP2CB;PSMB2;PSMC1;RASA2;CALM1
Signaling by Wnt Homo sapiens R-HSA-195721	7	0.0261784	3.3967	PSMD10;PPP2CA;PPP2CB;PPP3CB;PSMB2;PSMC1;CALM1
Signaling by Insulin receptor Homo sapiens R-HSA-74752	7	0.0301062	3.2153	PSMD10;PPP2CA;PPP2CB;PSMB2;PSMC1;RASA2;CALM1
Signaling by SCF-KIT Homo sapiens R-HSA-1433557	7	0.0341638	3.07154	PSMD10;PPP2CA;PPP2CB;PSMB2;PSMC1;RASA2;CALM1
Downstream signaling of activated FGFR2 Homo sapiens R-HSA-5654696	7	0.0351032	3.03276	PSMD10;PPP2CA;PPP2CB;PSMB2;PSMC1;RASA2;CALM1
Downstream signaling of activated FGFR4 Homo sapiens R-HSA-5654716	7	0.0351032	3.03276	PSMD10;PPP2CA;PPP2CB;PSMB2;PSMC1;RASA2;CALM1
Downstream signaling of activated FGFR3 Homo sapiens R-HSA-5654708	7	0.0351032	3.03276	PSMD10;PPP2CA;PPP2CB;PSMB2;PSMC1;RASA2;CALM1
Signaling by ERBB4 Homo sapiens R-HSA-1236394	7	0.0351032	3.02322	PSMD10;PPP2CA;PPP2CB;PSMB2;PSMC1;RASA2;CALM1
Signaling by FGFR4 Homo sapiens R-HSA-5654743	7	0.0355293	3.00431	PSMD10;PPP2CA;PPP2CB;PSMB2;PSMC1;RASA2;CALM1
Downstream signaling of activated FGFR1 Homo sapiens R-HSA-5654687	7	0.0355293	3.00431	PSMD10;PPP2CA;PPP2CB;PSMB2;PSMC1;RASA2;CALM1
Signaling by FGFR3 Homo sapiens R-HSA-5654741	7	0.0356767	2.99494	PSMD10;PPP2CA;PPP2CB;PSMB2;PSMC1;RASA2;CALM1
Metabolism of amino acids and derivatives Homo sapiens R-HSA-71291	7	0.0364113	2.97637	PSMD10;HIBADH;PSMB2;PSMC1;CCBL2;SMS;IARS
Signaling by FGFR1 Homo sapiens R-HSA-5654736	7	0.0364113	2.96717	PSMD10;PPP2CA;PPP2CB;PSMB2;PSMC1;RASA2;CALM1
DAP12 signaling Homo sapiens R-HSA-2424491	7	0.0390036	2.89555	PSMD10;PPP2CA;PPP2CB;PSMB2;PSMC1;RASA2;CALM1
Signaling by EGFR Homo sapiens R-HSA-177929	7	0.043384	2.80244	PSMD10;PPP2CA;PPP2CB;PSMB2;PSMC1;RASA2;CALM1
G1/S Transition Homo sapiens R-HSA-69206	6	0.00901014	7.92734	PSMD10;PPP2CA;PPP2CB;PSMB2;PSMC1;CDC6
Activation of NF-kappaB in B cells Homo sapiens R-HSA-1169091	5	0.00765678	11.4246	IKBKB;PSMD10;PSMB2;PSMC1;NFKB1
Degradation of beta-catenin by the destruction complex Homo sapiens R-HSA-195253	5	0.0127668	9.04335	PSMD10;PPP2CA;PPP2CB;PSMB2;PSMC1
Downstream TCR signaling Homo sapiens R-HSA-202424	5	0.0181737	7.40148	PSMD10;IKBKB;PSMB2;PSMC1;NFKB1
FCERI mediated NF-kB activation Homo sapiens R-HSA-2871837	5	0.0213309	6.55959	PSMD10;IKBKB;PSMB2;PSMC1;NFKB1
TCR signaling Homo sapiens R-HSA-202403	5	0.0213309	6.15107	PSMD10;IKBKB;PSMB2;PSMC1;NFKB1
S Phase Homo sapiens R-HSA-69242	5	0.0217563	5.83915	PSMD10;PSMB2;PSMC1;CDC6;SMC3
Beta-catenin independent WNT signaling Homo sapiens R-HSA-3858494	5	0.0261072	4.99392	PSMD10;PPP3CB;PSMB2;PSMC1;CALM1
Apoptosis Homo sapiens R-HSA-109581	5	0.0281289	4.38915	PSMD10;FNTA;STK24;PSMB2;PSMC1
Programmed Cell Death Homo sapiens R-HSA-5357801	5	0.0289898	4.30671	PSMD10;FNTA;STK24;PSMB2;PSMC1
G2/M Transition Homo sapiens R-HSA-69275	5	0.0325125	4.1258	PSMD10;PPP2CA;PPP2CB;PSMB2;PSMC1
Mitotic G2-G2/M phases Homo sapiens R-HSA-453274	5	0.0327264	4.07684	PSMD10;PPP2CA;PPP2CB;PSMB2;PSMC1
TCF dependent signaling in response to WNT Homo sapiens R-HSA-201681	5	0.0432682	3.56814	PSMD10;PPP2CA;PPP2CB;PSMB2;PSMC1
DARPP-32 events Homo sapiens R-HSA-180024	4	0.0035446	27.7385	PPP2CA;PPP2CB;PPP3CB;CALM1
CDK-mediated phosphorylation and removal of Cdc6 Homo sapiens R-HSA-69017	4	0.0146625	12.0444	PSMD10;PSMB2;PSMC1;CDC6
CDT1 association with the CDC6:ORC:origin complex Homo sapiens R-HSA-68827	4	0.018543	10.2559	PSMD10;PSMB2;PSMC1;CDC6
MAP kinase activation in TLR cascade Homo sapiens R-HSA-450294	4	0.0195669	9.88861	IKBKB;PPP2CA;PPP2CB;NFKB1
Regulation of RAS by GAPs Homo sapiens R-HSA-5658442	4	0.0213309	8.78677	PSMD10;PSMB2;PSMC1;RASA2
Assembly of the pre-replicative complex Homo sapiens R-HSA-68867	4	0.0213309	8.78677	PSMD10;PSMB2;PSMC1;CDC6
Switching of origins to a post-replicative state Homo sapiens R-HSA-69052	4	0.0213309	8.3861	PSMD10;PSMB2;PSMC1;CDC6
Orc1 removal from chromatin Homo sapiens R-HSA-68949	4	0.0213309	8.3861	PSMD10;PSMB2;PSMC1;CDC6
Removal of licensing factors from origins Homo sapiens R-HSA-69300	4	0.0213309	8.13863	PSMD10;PSMB2;PSMC1;CDC6
TRAF6 Mediated Induction of proinflammatory cytokines Homo sapiens R-HSA-168180	4	0.0213309	8.13863	IKBKB;PPP2CA;PPP2CB;NFKB1
Regulation of DNA replication Homo sapiens R-HSA-69304	4	0.0217563	7.79356	PSMD10;PSMB2;PSMC1;CDC6
Opioid Signalling Homo sapiens R-HSA-111885	4	0.0237693	7.18409	PPP2CA;PPP2CB;PPP3CB;CALM1
DNA Replication Pre-Initiation Homo sapiens R-HSA-69002	4	0.0237693	7.09163	PSMD10;PSMB2;PSMC1;CDC6
M/G1 Transition Homo sapiens R-HSA-68874	4	0.0237693	7.09163	PSMD10;PSMB2;PSMC1;CDC6
Toll Like Receptor 10 (TLR10) Cascade Homo sapiens R-HSA-168142	4	0.0237693	7.09163	IKBKB;PPP2CA;PPP2CB;NFKB1
Toll Like Receptor 5 (TLR5) Cascade Homo sapiens R-HSA-168176	4	0.0237693	7.09163	IKBKB;PPP2CA;PPP2CB;NFKB1
MyD88 cascade initiated on plasma membrane Homo sapiens R-HSA-975871	4	0.0237693	7.09163	IKBKB;PPP2CA;PPP2CB;NFKB1
TRAF6 mediated induction of NFkB and MAP kinases upon TLR7/8 or 9 activation Homo sapiens R-HSA-975138	4	0.0238794	7.0015	IKBKB;PPP2CA;PPP2CB;NFKB1
Metabolism of polyamines Homo sapiens R-HSA-351202	4	0.0239581	6.91364	PSMD10;PSMB2;PSMC1;SMS
MyD88 dependent cascade initiated on endosome Homo sapiens R-HSA-975155	4	0.0240852	6.82794	IKBKB;PPP2CA;PPP2CB;NFKB1
Toll Like Receptor 7/8 (TLR7/8) Cascade Homo sapiens R-HSA-168181	4	0.0240852	6.82794	IKBKB;PPP2CA;PPP2CB;NFKB1
Regulation of mRNA stability by proteins that bind AU-rich elements Homo sapiens R-HSA-450531	4	0.0248155	6.74433	PSMD10;PSMB2;PSMC1;PARN
Platelet homeostasis Homo sapiens R-HSA-418346	4	0.024894	6.66273	PPP2CA;PPP2CB;ATP2B1;CALM1
Toll Like Receptor 9 (TLR9) Cascade Homo sapiens R-HSA-168138	4	0.0251281	6.58308	IKBKB;PPP2CA;PPP2CB;NFKB1
MyD88:Mal cascade initiated on plasma membrane Homo sapiens R-HSA-166058	4	0.0261572	6.28258	IKBKB;PPP2CA;PPP2CB;NFKB1
Toll Like Receptor TLR1:TLR2 Cascade Homo sapiens R-HSA-168179	4	0.0261572	6.28258	IKBKB;PPP2CA;PPP2CB;NFKB1
Toll Like Receptor TLR6:TLR2 Cascade Homo sapiens R-HSA-168188	4	0.0261572	6.28258	IKBKB;PPP2CA;PPP2CB;NFKB1
Toll Like Receptor 2 (TLR2) Cascade Homo sapiens R-HSA-181438	4	0.0261572	6.28258	IKBKB;PPP2CA;PPP2CB;NFKB1
Synthesis of DNA Homo sapiens R-HSA-69239	4	0.0261572	5.9433	PSMD10;PSMB2;PSMC1;CDC6
MyD88-independent TLR3/TLR4 cascade Homo sapiens R-HSA-166166	4	0.0261572	5.9433	IKBKB;PPP2CA;PPP2CB;NFKB1
Toll Like Receptor 3 (TLR3) Cascade Homo sapiens R-HSA-168164	4	0.0261572	5.9433	IKBKB;PPP2CA;PPP2CB;NFKB1
TRIF-mediated TLR3/TLR4 signaling Homo sapiens R-HSA-937061	4	0.0261572	5.9433	IKBKB;PPP2CA;PPP2CB;NFKB1
Resolution of Sister Chromatid Cohesion Homo sapiens R-HSA-2500257	4	0.0261784	5.81759	PPP2CA;PPP2CB;ZWILCH;SMC3
DNA Replication Homo sapiens R-HSA-69306	4	0.0287343	5.47033	PSMD10;PSMB2;PSMC1;CDC6
Mitotic Prophase Homo sapiens R-HSA-68875	4	0.0298511	5.36357	PPP2CA;PPP2CB;USO1;PPP2R2D
Mitotic Prometaphase Homo sapiens R-HSA-68877	4	0.0298511	5.36357	PPP2CA;PPP2CB;ZWILCH;SMC3
Activated TLR4 signalling Homo sapiens R-HSA-166054	4	0.0325312	5.11396	IKBKB;PPP2CA;PPP2CB;NFKB1
Toll Like Receptor 4 (TLR4) Cascade Homo sapiens R-HSA-166016	4	0.0370965	4.6782	IKBKB;PPP2CA;PPP2CB;NFKB1
MASTL Facilitates Mitotic Progression Homo sapiens R-HSA-2465910	3	0.0035446	59.0655	PPP2CA;PPP2CB;PPP2R2D
E2F mediated regulation of DNA replication Homo sapiens R-HSA-113510	3	0.0213309	13.766	PPP2CA;PPP2CB;CDC6
Regulation of TP53 Degradation Homo sapiens R-HSA-6804757	3	0.0217563	12.9043	PPP2CA;PPP2CB;CCNG1
Regulation of TP53 Expression and Degradation Homo sapiens R-HSA-6806003	3	0.0217563	12.5126	PPP2CA;PPP2CB;CCNG1
G1 Phase Homo sapiens R-HSA-69236	3	0.023084	11.7964	PPP2CA;RBL2;PPP2CB
Cyclin D associated events in G1 Homo sapiens R-HSA-69231	3	0.023084	11.7964	PPP2CA;RBL2;PPP2CB
Regulation of activated PAK-2p34 by proteasome mediated degradation Homo sapiens R-HSA-211733	3	0.0261572	8.97056	PSMD10;PSMB2;PSMC1
Cross-presentation of soluble exogenous antigens (endosomes) Homo sapiens R-HSA-1236978	3	0.0261572	8.97056	PSMD10;PSMB2;PSMC1
Ubiquitin-dependent degradation of Cyclin D1 Homo sapiens R-HSA-69229	3	0.0261572	8.77926	PSMD10;PSMB2;PSMC1
Ubiquitin-dependent degradation of Cyclin D Homo sapiens R-HSA-75815	3	0.0261572	8.77926	PSMD10;PSMB2;PSMC1
Regulation of Apoptosis Homo sapiens R-HSA-169911	3	0.0261572	8.77926	PSMD10;PSMB2;PSMC1
Regulation of ornithine decarboxylase (ODC) Homo sapiens R-HSA-350562	3	0.0261572	8.77926	PSMD10;PSMB2;PSMC1
Vpu mediated degradation of CD4 Homo sapiens R-HSA-180534	3	0.0261784	8.59592	PSMD10;PSMB2;PSMC1
Autodegradation of the E3 ubiquitin ligase COP1 Homo sapiens R-HSA-349425	3	0.0261784	8.59592	PSMD10;PSMB2;PSMC1
p53-Independent DNA Damage Response Homo sapiens R-HSA-69610	3	0.0268208	8.42007	PSMD10;PSMB2;PSMC1
p53-Independent G1/S DNA damage checkpoint Homo sapiens R-HSA-69613	3	0.0268208	8.42007	PSMD10;PSMB2;PSMC1
Ubiquitin Mediated Degradation of Phosphorylated Cdc25A Homo sapiens R-HSA-69601	3	0.0268208	8.42007	PSMD10;PSMB2;PSMC1
Vif-mediated degradation of APOBEC3G Homo sapiens R-HSA-180585	3	0.0276687	8.25125	PSMD10;PSMB2;PSMC1
SCF-beta-TrCP mediated degradation of Emi1 Homo sapiens R-HSA-174113	3	0.0281289	8.08905	PSMD10;PSMB2;PSMC1
Stabilization of p53 Homo sapiens R-HSA-69541	3	0.0281289	8.08905	PSMD10;PSMB2;PSMC1
AUF1 (hnRNP D0) binds and destabilizes mRNA Homo sapiens R-HSA-450408	3	0.0281289	8.08905	PSMD10;PSMB2;PSMC1
Degradation of AXIN Homo sapiens R-HSA-4641257	3	0.0281289	8.08905	PSMD10;PSMB2;PSMC1
Hh mutants that don't undergo autocatalytic processing are degraded by ERAD Homo sapiens R-HSA-5362768	3	0.0289898	7.93309	PSMD10;PSMB2;PSMC1
Degradation of DVL Homo sapiens R-HSA-4641258	3	0.0298588	7.78302	PSMD10;PSMB2;PSMC1
Hh mutants abrogate ligand secretion Homo sapiens R-HSA-5387390	3	0.030938	7.6385	PSMD10;PSMB2;PSMC1
NIK-->noncanonical NF-kB signaling Homo sapiens R-HSA-5676590	3	0.0322404	7.49924	PSMD10;PSMB2;PSMC1
Degradation of GLI1 by the proteasome Homo sapiens R-HSA-5610780	3	0.0325125	7.36496	PSMD10;PSMB2;PSMC1
GLI3 is processed to GLI3R by the proteasome Homo sapiens R-HSA-5610785	3	0.0325125	7.36496	PSMD10;PSMB2;PSMC1
Degradation of GLI2 by the proteasome Homo sapiens R-HSA-5610783	3	0.0325125	7.36496	PSMD10;PSMB2;PSMC1
The role of GTSE1 in G2/M progression after G2 checkpoint Homo sapiens R-HSA-8852276	3	0.0325125	7.36496	PSMD10;PSMB2;PSMC1
SCF(Skp2)-mediated degradation of p27/p21 Homo sapiens R-HSA-187577	3	0.0325125	7.36496	PSMD10;PSMB2;PSMC1
HDACs deacetylate histones Homo sapiens R-HSA-3214815	3	0.0334119	7.23538	SAP30L;SAP18;ARID4B
Dectin-1 mediated noncanonical NF-kB signaling Homo sapiens R-HSA-5607761	3	0.0341638	7.11027	PSMD10;PSMB2;PSMC1
Autodegradation of Cdh1 by Cdh1:APC/C Homo sapiens R-HSA-174084	3	0.0351032	6.98941	PSMD10;PSMB2;PSMC1
p53-Dependent G1/S DNA damage checkpoint Homo sapiens R-HSA-69580	3	0.0351032	6.87257	PSMD10;PSMB2;PSMC1
p53-Dependent G1 DNA Damage Response Homo sapiens R-HSA-69563	3	0.0351032	6.87257	PSMD10;PSMB2;PSMC1
Asymmetric localization of PCP proteins Homo sapiens R-HSA-4608870	3	0.0351032	6.87257	PSMD10;PSMB2;PSMC1
Hedgehog ligand biogenesis Homo sapiens R-HSA-5358346	3	0.0356767	6.75956	PSMD10;PSMB2;PSMC1
ER-Phagosome pathway Homo sapiens R-HSA-1236974	3	0.0364113	6.6502	PSMD10;PSMB2;PSMC1
G1/S DNA Damage Checkpoints Homo sapiens R-HSA-69615	3	0.0364113	6.6502	PSMD10;PSMB2;PSMC1
APC/C:Cdc20 mediated degradation of Securin Homo sapiens R-HSA-174154	3	0.0370965	6.54431	PSMD10;PSMB2;PSMC1
Cytosolic sensors of pathogen-associated DNA Homo sapiens R-HSA-1834949	3	0.0370965	6.54431	IKBKB;POLR3E;NFKB1
Cyclin E associated events during G1/S transition Homo sapiens R-HSA-69202	3	0.0390036	6.34231	PSMD10;PSMB2;PSMC1
Cyclin A:Cdk2-associated events at S phase entry Homo sapiens R-HSA-69656	3	0.0401725	6.2459	PSMD10;PSMB2;PSMC1
APC/C:Cdh1 mediated degradation of Cdc20 and other APC/C:Cdh1 targeted proteins in late mitosis/early G1 Homo sapiens R-HSA-174178	3	0.0424549	6.06158	PSMD10;PSMB2;PSMC1
Cdc20:Phospho-APC/C mediated degradation of Cyclin A Homo sapiens R-HSA-174184	3	0.0424549	6.06158	PSMD10;PSMB2;PSMC1
APC:Cdc20 mediated degradation of cell cycle proteins prior to satisfation of the cell cycle checkpoint Homo sapiens R-HSA-179419	3	0.043384	5.97343	PSMD10;PSMB2;PSMC1
PP2A-mediated dephosphorylation of key metabolic factors Homo sapiens R-HSA-163767	2	0.0202371	54.7531	PPP2CA;PPP2CB
IkBA variant leads to EDA-ID Homo sapiens R-HSA-5603029	2	0.0202371	54.7531	IKBKB;NFKB1
IKBKG deficiency causes anhidrotic ectodermal dysplasia with immunodeficiency (EDA-ID) (via TLR) Homo sapiens R-HSA-5603027	2	0.0213309	45.6253	IKBKB;NFKB1
CLEC7A (Dectin-1) induces NFAT activation Homo sapiens R-HSA-5607763	2	0.0236312	30.4123	PPP3CB;CALM1
Keratan sulfate degradation Homo sapiens R-HSA-2022857	2	0.0238794	27.3697	GLB1;HEXB
Reduction of cytosolic Ca++ levels Homo sapiens R-HSA-418359	2	0.0238794	27.3697	ATP2B1;CALM1
Inhibition of replication initiation of damaged DNA by RB1/E2F1 Homo sapiens R-HSA-113501	2	0.0238794	27.3697	PPP2CA;PPP2CB
ERKs are inactivated Homo sapiens R-HSA-202670	2	0.0238794	27.3697	PPP2CA;PPP2CB
Initiation of Nuclear Envelope Reformation Homo sapiens R-HSA-2995383	2	0.024894	24.8803	PPP2CA;ANKLE2
Nuclear Envelope Reassembly Homo sapiens R-HSA-2995410	2	0.024894	24.8803	PPP2CA;ANKLE2
NF-kB is activated and signals survival Homo sapiens R-HSA-209560	2	0.024894	24.8803	IKBKB;NFKB1
AMER1 mutants destabilize the destruction complex Homo sapiens R-HSA-4839748	2	0.0261572	22.8057	PPP2CA;PPP2CB
Truncations of AMER1 destabilize the destruction complex Homo sapiens R-HSA-5467348	2	0.0261572	22.8057	PPP2CA;PPP2CB
truncated APC mutants destabilize the destruction complex Homo sapiens R-HSA-4839744	2	0.0261572	22.8057	PPP2CA;PPP2CB
AXIN missense mutants destabilize the destruction complex Homo sapiens R-HSA-5467340	2	0.0261572	22.8057	PPP2CA;PPP2CB
AXIN mutants destabilize the destruction complex, activating WNT signaling Homo sapiens R-HSA-4839735	2	0.0261572	22.8057	PPP2CA;PPP2CB
APC truncation mutants have impaired AXIN binding Homo sapiens R-HSA-5467337	2	0.0261572	22.8057	PPP2CA;PPP2CB
S33 mutants of beta-catenin aren't phosphorylated Homo sapiens R-HSA-5358747	2	0.0261572	21.0504	PPP2CA;PPP2CB
S45 mutants of beta-catenin aren't phosphorylated Homo sapiens R-HSA-5358751	2	0.0261572	21.0504	PPP2CA;PPP2CB
phosphorylation site mutants of CTNNB1 are not targeted to the proteasome by the destruction complex Homo sapiens R-HSA-4839743	2	0.0261572	21.0504	PPP2CA;PPP2CB
T41 mutants of beta-catenin aren't phosphorylated Homo sapiens R-HSA-5358752	2	0.0261572	21.0504	PPP2CA;PPP2CB
S37 mutants of beta-catenin aren't phosphorylated Homo sapiens R-HSA-5358749	2	0.0261572	21.0504	PPP2CA;PPP2CB
Misspliced GSK3beta mutants stabilize beta-catenin Homo sapiens R-HSA-5339716	2	0.0261572	21.0504	PPP2CA;PPP2CB
p75NTR signals via NF-kB Homo sapiens R-HSA-193639	2	0.0261572	19.5458	IKBKB;NFKB1
Spry regulation of FGF signaling Homo sapiens R-HSA-1295596	2	0.0261572	19.5458	PPP2CA;PPP2CB
MAP3K8 (TPL2)-dependent MAPK1/3 activation Homo sapiens R-HSA-5684264	2	0.0261572	19.5458	IKBKB;NFKB1
Platelet sensitization by LDL Homo sapiens R-HSA-432142	2	0.027151	18.2418	PPP2CA;PPP2CB
Beta-catenin phosphorylation cascade Homo sapiens R-HSA-196299	2	0.027151	18.2418	PPP2CA;PPP2CB
HS-GAG degradation Homo sapiens R-HSA-2024096	2	0.0341638	14.3985	GLB1;GPC3
RIP-mediated NFkB activation via ZBP1 Homo sapiens R-HSA-1810476	2	0.0341638	14.3985	IKBKB;NFKB1
ERK/MAPK targets Homo sapiens R-HSA-198753	2	0.0341638	14.3985	PPP2CA;PPP2CB
CTLA4 inhibitory signaling Homo sapiens R-HSA-389513	2	0.0351032	13.6779	PPP2CA;PPP2CB
Cyclin A/B1 associated events during G2/M transition Homo sapiens R-HSA-69273	2	0.0351032	13.6779	PPP2CA;PPP2CB
Deadenylation of mRNA Homo sapiens R-HSA-429947	2	0.0364113	13.0259	PARN;CNOT8
Diseases associated with the TLR signaling cascade Homo sapiens R-HSA-5602358	2	0.038098	12.4332	IKBKB;NFKB1
Diseases of Immune System Homo sapiens R-HSA-5260271	2	0.038098	12.4332	IKBKB;NFKB1
TRAF6 mediated NF-kB activation Homo sapiens R-HSA-933542	2	0.038098	12.4332	IKBKB;NFKB1
Nuclear Events (kinase and transcription factor activation) Homo sapiens R-HSA-198725	2	0.038098	12.4332	PPP2CA;PPP2CB
G0 and Early G1 Homo sapiens R-HSA-1538133	2	0.0401725	11.8921	RBL2;CDC6
RAF activation Homo sapiens R-HSA-5673000	2	0.0401725	11.8921	PPP2CA;PPP2CB
ZBP1(DAI) mediated induction of type I IFNs Homo sapiens R-HSA-1606322	2	0.0424549	11.396	IKBKB;NFKB1
TAK1 activates NFkB by phosphorylation and activation of IKKs complex Homo sapiens R-HSA-445989	2	0.0424549	11.396	IKBKB;NFKB1
Term (GO BP-2021)	Nº genes	Adjusted p-value	Odds Ratio	Genes
Fc-epsilon receptor signaling pathway (GO:0038095)	7	0.0103153	9.49471	PSMD10;IKBKB;PPP3CB;PSMB2;PSMC1;CALM1;NFKB1
Fc receptor signaling pathway (GO:0038093)	7	0.0103153	9.40381	PSMD10;IKBKB;PPP3CB;PSMB2;PSMC1;CALM1;NFKB1
