# Supplementary material for: Blood Leukocyte Transcriptional Modules and Differentially Expressed Genes Associated with Disease Severity and Age in COVID-19 Patients
Source: Preprints.org preprint supplement (doi:10.20944/preprints202208.0181.v1), 2022-08-09
Supplement: Supplementary file 5 [file TableS7_Bando et al.xlsx]

## Sheet: Black-KEGG_2021_Human_table (1)
Term	Overlap	P-value	Adjusted P-value	Old P-value	Old Adjusted P-value	Odds Ratio	Combined Score	Genes
Natural killer cell mediated cytotoxicity	8/131	0.00188639	0.196768	0	0	3.8041	23.8635	FCGR3A;SHC1;TNFSF10;HLA-B;PLCG2;TNFRSF10B;KRAS;RAC1
Synaptic vesicle cycle	1978-06-01	0.00218636	0.196768	0	0	4.85764	29.7556	NSF;CACNA1B;STX3;SLC6A2;AP2M1;DNM1
Base excision repair	1933-04-01	0.00232403	0.196768	0	0	8.0102	48.5775	POLD4;PARP4;POLE3;HMGB1
Apoptosis	8/142	0.00311464	0.19778	0	0	3.48986	20.1422	PARP4;DIABLO;TNFSF10;TNFRSF10B;KRAS;CFLAR;BIRC2;MCL1
Basal transcription factors	1945-04-01	0.00720953	0.291478	0	0	5.66229	27.9284	TAF6L;GTF2B;TBPL1;GTF2E1
Sulfur relay system	2021-02-08	0.00762598	0.291478	0	0	19.2667	93.948	NFS1;MOCS3
Toll-like receptor signaling pathway	6/104	0.00894346	0.291478	0	0	3.56414	16.8115	TLR1;TBK1;RAC1;IRAK4;TLR6;TLR2
Salmonella infection	10/249	0.0109063	0.291478	0	0	2.44732	11.058	ANXA2;MLKL;MYO6;TNFSF10;TNFRSF10B;RAC1;TLR6;IRAK4;BIRC2;TLR2
Human immunodeficiency virus 1 infection	9/212	0.010993	0.291478	0	0	2.5902	11.6831	TBK1;HLA-B;PLCG2;TAP1;KRAS;RAC1;IRAK4;TLR2;PAK4
Herpes simplex virus 1 infection	16/498	0.0122343	0.291478	0	0	1.9526	8.59829	ZNF133;EIF2B5;ZNF792;RNASEL;HLA-B;TAP1;ZNF3;IRAK4;TBK1;ZNF714;ZNF615;ZNF768;ZNF205;ZNF564;BIRC2;TLR2
B cell receptor signaling pathway	1981-05-01	0.0126231	0.291478	0	0	3.82282	16.7142	IFITM1;INPPL1;PLCG2;KRAS;RAC1
Phagosome	7/152	0.0158253	0.334968	0	0	2.81196	11.6588	FCGR3A;CD209;HLA-B;TAP1;RAC1;TLR6;TLR2
Influenza A	7/172	0.028775	0.472409	0	0	2.46858	8.75915	RNASEL;TBK1;TNFSF10;TNFRSF10B;NUP98;IRAK4;PRSS2
Endocytosis	9/252	0.0299052	0.472409	0	0	2.15938	7.57883	RAB10;TSG101;CAPZA1;PSD4;RAB35;HLA-B;VPS26B;AP2M1;DNM1
Lipid and atherosclerosis	8/215	0.032059	0.472409	0	0	2.25069	7.74276	TBK1;TNFSF10;TNFRSF10B;KRAS;RAC1;TLR6;IRAK4;TLR2
Homologous recombination	1941-03-01	0.0327459	0.472409	0	0	4.56917	15.6219	TOP3B;POLD4;TOP3A
NF-kappa B signaling pathway	5/104	0.033121	0.472409	0	0	2.93124	9.98846	PLCG2;IRAK4;LTB;CFLAR;BIRC2
Nitrogen metabolism	2021-02-17	0.0334778	0.472409	0	0	7.70314	26.1666	CA6;CA14
Other glycan degradation	2021-02-18	0.0372447	0.497903	0	0	7.22132	23.7599	MANBA;FUCA1
Pantothenate and CoA biosynthesis	2021-02-21	0.0494427	0.543752	0	0	6.08019	18.2828	ALDH3A2;COASY
Growth hormone synthesis, secretion and action	5/119	0.0537303	0.543752	0	0	2.5436	7.43692	SHC1;PLCG2;KRAS;CACNA1C;SSTR3
Neurotrophin signaling pathway	5/119	0.0537303	0.543752	0	0	2.5436	7.43692	SHC1;PLCG2;KRAS;RAC1;IRAK4
Histidine metabolism	2021-02-22	0.0537873	0.543752	0	0	5.77588	16.8813	ALDH3A2;ALDH3A1
Necroptosis	6/159	0.0559196	0.543752	0	0	2.27649	6.56504	MLKL;TNFSF10;TNFRSF10B;HMGB1;CFLAR;BIRC2
ErbB signaling pathway	1985-04-01	0.0579501	0.543752	0	0	2.86025	8.14649	SHC1;PLCG2;KRAS;PAK4
Epstein-Barr virus infection	7/202	0.0592225	0.543752	0	0	2.08559	5.89482	TBK1;HLA-B;PLCG2;TAP1;RAC1;IRAK4;TLR2
Taste transduction	1986-04-01	0.0599953	0.543752	0	0	2.82523	7.94875	TAS2R9;P2RX2;CACNA1C;SCN3A
Viral carcinogenesis	7/203	0.0604853	0.543752	0	0	2.07484	5.82066	GTF2B;HLA-B;TBPL1;KRAS;RAC1;GTF2E1;YWHAZ
Endocrine and other factor-regulated calcium reabsorption	1953-03-01	0.0620819	0.543752	0	0	3.47044	9.6454	ATP1A3;AP2M1;DNM1
VEGF signaling pathway	1959-03-01	0.0800734	0.653231	0	0	3.09766	7.82101	PLCG2;KRAS;RAC1
Fc gamma R-mediated phagocytosis	1997-04-01	0.0849516	0.653231	0	0	2.48966	6.13869	FCGR3A;INPPL1;PLCG2;RAC1
Phosphatidylinositol signaling system	1997-04-01	0.0849516	0.653231	0	0	2.48966	6.13869	ITPKC;INPPL1;PLCG2;IP6K1
Autophagy	5/137	0.0864025	0.653231	0	0	2.19472	5.3743	RRAGA;TBK1;KRAS;HMGB1;CFLAR
Tuberculosis	6/180	0.0892996	0.653231	0	0	1.99959	4.83053	TLR1;FCGR3A;CD209;IRAK4;TLR6;TLR2
AGE-RAGE signaling pathway in diabetic complications	4/100	0.0925139	0.653231	0	0	2.41149	5.7403	COL4A2;PLCG2;KRAS;RAC1
beta-Alanine metabolism	1930-02-01	0.0927459	0.653231	0	0	4.12395	9.80631	ALDH3A2;ALDH3A1
GnRH secretion	1964-03-01	0.0965846	0.653231	0	0	2.84303	6.64511	KRAS;CACNA1C;HCN2
Chagas disease	4/102	0.0977275	0.653231	0	0	2.36203	5.49308	IRAK4;TLR6;CFLAR;TLR2
Protein digestion and absorption	4/103	0.100385	0.653788	0	0	2.33806	5.37459	COL4A2;ELN;ATP1A3;PRSS2
Ras signaling pathway	7/232	0.104261	0.662058	0	0	1.80472	4.08022	TBK1;SHC1;RASA4;PLCG2;KRAS;RAC1;PAK4
Fc epsilon RI signaling pathway	1968-03-01	0.110701	0.685806	0	0	2.66753	5.87103	PLCG2;KRAS;RAC1
Renal cell carcinoma	1969-03-01	0.114348	0.691531	0	0	2.62698	5.69663	KRAS;RAC1;PAK4
Pathogenic Escherichia coli infection	6/197	0.122757	0.700415	0	0	1.82003	3.81759	SLC9A3R1;MYO6;TNFSF10;TNFRSF10B;RAC1;IRAK4
DNA replication	1936-02-01	0.125823	0.700415	0	0	3.39516	7.03776	POLD4;POLE3
Inositol phosphate metabolism	1973-03-01	0.129374	0.700415	0	0	2.47636	5.06428	ITPKC;INPPL1;PLCG2
Focal adhesion	6/201	0.131418	0.700415	0	0	1.78233	3.617	COL4A2;SHC1;TNR;RAC1;BIRC2;PAK4
Aldosterone-regulated sodium reabsorption	1937-02-01	0.131579	0.700415	0	0	3.29798	6.68879	ATP1A3;KRAS
Hepatitis C	5/157	0.132362	0.700415	0	0	1.90399	3.85028	RNASEL;TBK1;KRAS;CFLAR;YWHAZ
Glioma	1975-03-01	0.137136	0.709688	0	0	2.40733	4.78284	SHC1;PLCG2;KRAS
Bacterial invasion of epithelial cells	1977-03-01	0.145052	0.709688	0	0	2.34202	4.52165	SHC1;RAC1;DNM1
Leishmaniasis	1977-03-01	0.145052	0.709688	0	0	2.34202	4.52165	FCGR3A;IRAK4;TLR2
Hepatitis B	5/162	0.14529	0.709688	0	0	1.84288	3.55496	TBK1;KRAS;IRAK4;YWHAZ;TLR2
Synthesis and degradation of ketone bodies	2021-01-10	0.158457	0.759396	0	0	6.40241	11.795	HMGCL
Hepatocellular carcinoma	5/168	0.161487	0.759586	0	0	1.7745	3.2355	TERT;PHF10;SHC1;PLCG2;KRAS
Ubiquinone and other terpenoid-quinone biosynthesis	2021-01-11	0.172854	0.798272	0	0	5.76188	10.1139	COQ5
Lysosome	4/128	0.176544	0.799452	0	0	1.86429	3.23302	MANBA;FUCA1;CTSE;AP4B1
Type II diabetes mellitus	1946-02-01	0.185629	0.799452	0	0	2.62219	4.41578	CACNA1B;CACNA1C
Nucleotide excision repair	1947-02-01	0.191824	0.799452	0	0	2.56379	4.23327	POLD4;POLE3
GABAergic synapse	1989-03-01	0.195333	0.799452	0	0	2.01399	3.28895	NSF;CACNA1B;CACNA1C
Valine, leucine and isoleucine degradation	1948-02-01	0.198045	0.799452	0	0	2.50793	4.06099	ALDH3A2;HMGCL
NOD-like receptor signaling pathway	5/181	0.198869	0.799452	0	0	1.64233	2.65255	RNASEL;TBK1;IRAK4;MEFV;BIRC2
Axon guidance	5/182	0.201861	0.799452	0	0	1.63297	2.61304	ROBO3;PLCG2;KRAS;RAC1;PAK4
Coronavirus disease	6/232	0.207416	0.799452	0	0	1.5354	2.41523	TBK1;PLCG2;RPL26;IRAK4;RPL3L;TLR2
Estrogen signaling pathway	4/137	0.207729	0.799452	0	0	1.73733	2.73025	KRT19;SHC1;KRAS;KRT32
Yersinia infection	4/137	0.207729	0.799452	0	0	1.73733	2.73025	TBK1;RAC1;IRAK4;MEFV
Human papillomavirus infection	8/331	0.207732	0.799452	0	0	1.43379	2.25321	SLC9A3R1;TBK1;TERT;COL4A2;HLA-B;TBPL1;TNR;KRAS
Measles	4/139	0.214867	0.809331	0	0	1.71142	2.63171	TBK1;CD209;IRAK4;TLR2
Staphylococcus aureus infection	1995-03-01	0.221893	0.809331	0	0	1.88207	2.83357	FCGR3A;KRT19;KRT32
Neutrophil extracellular trap formation	5/189	0.223216	0.809331	0	0	1.57028	2.35482	FCGR3A;PLCG2;HMGB1;RAC1;TLR2
Thiamine metabolism	2021-01-15	0.22803	0.809331	0	0	4.11479	6.08281	NFS1
Calcium signaling pathway	6/240	0.229188	0.809331	0	0	1.4823	2.18373	ITPKC;P2RX2;MST1;PLCG2;CACNA1B;CACNA1C
Aldosterone synthesis and secretion	1998-03-01	0.235434	0.809331	0	0	1.82236	2.63572	ATP1A3;PRKD1;CACNA1C
Kaposi sarcoma-associated herpesvirus infection	5/193	0.235714	0.809331	0	0	1.53656	2.22053	TBK1;HLA-B;PLCG2;KRAS;RAC1
Fanconi anemia pathway	1954-02-01	0.235789	0.809331	0	0	2.21787	3.20442	TOP3B;TOP3A
Viral protein interaction with cytokine and cytokine receptor	3/100	0.24454	0.827862	0	0	1.7846	2.51339	IL34;TNFSF10;TNFRSF10B
Phospholipase D signaling pathway	4/148	0.247754	0.827862	0	0	1.60371	2.23769	SHC1;PLCG2;KRAS;DNM1
Pancreatic secretion	3/102	0.253703	0.827862	0	0	1.74837	2.39805	ATP1A3;RAC1;PRSS2
Phenylalanine metabolism	2021-01-17	0.254225	0.827862	0	0	3.60007	4.93042	ALDH3A1
C-type lectin receptor signaling pathway	3/104	0.262913	0.83988	0	0	1.71357	2.28922	CD209;PLCG2;KRAS
Mineral absorption	1960-02-01	0.273883	0.83988	0	0	1.98783	2.57435	SLC34A3;ATP1A3
Viral myocarditis	1960-02-01	0.273883	0.83988	0	0	1.98783	2.57435	HLA-B;RAC1
Glycerolipid metabolism	1961-02-01	0.280234	0.83988	0	0	1.95404	2.48579	ALDH3A2;PNPLA2
One carbon pool by folate	2021-01-20	0.291866	0.83988	0	0	3.03118	3.73277	AMT
Steroid biosynthesis	2021-01-20	0.291866	0.83988	0	0	3.03118	3.73277	FDFT1
Cytosolic DNA-sensing pathway	1963-02-01	0.292922	0.83988	0	0	1.88978	2.32036	TBK1;POLR2F
TNF signaling pathway	3/112	0.3001	0.83988	0	0	1.58716	1.91037	MLKL;CFLAR;BIRC2
Toxoplasmosis	3/112	0.3001	0.83988	0	0	1.58716	1.91037	IRAK4;BIRC2;TLR2
Cholinergic synapse	3/113	0.304774	0.83988	0	0	1.57265	1.8686	CACNA1B;KRAS;CACNA1C
Serotonergic synapse	3/113	0.304774	0.83988	0	0	1.57265	1.8686	CACNA1B;KRAS;CACNA1C
Arginine biosynthesis	2021-01-22	0.315902	0.83988	0	0	2.74221	3.15992	ACY1
Glycolysis / Gluconeogenesis	1967-02-01	0.318195	0.83988	0	0	1.77312	2.03039	ALDH3A2;ALDH3A1
Long-term potentiation	1967-02-01	0.318195	0.83988	0	0	1.77312	2.03039	KRAS;CACNA1C
Mitophagy	1968-02-01	0.324483	0.83988	0	0	1.74617	1.96535	TBK1;KRAS
Mismatch repair	2021-01-23	0.327613	0.83988	0	0	2.61744	2.92086	POLD4
Proximal tubule bicarbonate reclamation	2021-01-23	0.327613	0.83988	0	0	2.61744	2.92086	ATP1A3
Sphingolipid signaling pathway	3/119	0.332857	0.83988	0	0	1.49085	1.63999	KRAS;RAC1;NSMAF
Epithelial cell signaling in Helicobacter pylori infection	1970-02-01	0.337012	0.83988	0	0	1.69464	1.84315	PLCG2;RAC1
Prolactin signaling pathway	1970-02-01	0.337012	0.83988	0	0	1.69464	1.84315	SHC1;KRAS
Human cytomegalovirus infection	5/225	0.340945	0.83988	0	0	1.3109	1.41057	TBK1;HLA-B;TAP1;KRAS;RAC1
Thyroid hormone signaling pathway	3/121	0.342216	0.83988	0	0	1.46543	1.57139	PLCG2;ATP1A3;KRAS
Non-small cell lung cancer	1972-02-01	0.34947	0.83988	0	0	1.64605	1.73055	PLCG2;KRAS
p53 signaling pathway	1973-02-01	0.35567	0.83988	0	0	1.62278	1.67755	TNFRSF10B;PPM1D
Glycosylphosphatidylinositol (GPI)-anchor biosynthesis	2021-01-26	0.36156	0.83988	0	0	2.30299	2.3429	PIGB
Neuroactive ligand-receptor interaction	7/341	0.366087	0.83988	0	0	1.20894	1.21484	UTS2R;NPB;GALR3;P2RX2;GRIK5;PRSS2;SSTR3
Osteoclast differentiation	3/127	0.370214	0.83988	0	0	1.39409	1.38527	FCGR3A;PLCG2;RAC1
Chronic myeloid leukemia	1976-02-01	0.374139	0.83988	0	0	1.55676	1.53049	SHC1;KRAS
Metabolism of xenobiotics by cytochrome P450	1976-02-01	0.374139	0.83988	0	0	1.55676	1.53049	ALDH3A1;CYP2S1
Pancreatic cancer	1976-02-01	0.374139	0.83988	0	0	1.55676	1.53049	KRAS;RAC1
Relaxin signaling pathway	3/129	0.379503	0.83988	0	0	1.37182	1.32915	COL4A2;SHC1;KRAS
Butanoate metabolism	2021-01-28	0.383236	0.83988	0	0	2.13218	2.04498	HMGCL
Antigen processing and presentation	1978-02-01	0.386331	0.83988	0	0	1.51563	1.44146	HLA-B;TAP1
RNA degradation	1979-02-01	0.392389	0.83988	0	0	1.49587	1.39939	BTG2;PABPC3
RNA transport	4/186	0.393672	0.83988	0	0	1.2664	1.18059	EIF2B5;PABPC3;NUP98;RPP38
PI3K-Akt signaling pathway	7/354	0.402391	0.83988	0	0	1.16286	1.05859	COL4A2;TNR;KRAS;RAC1;YWHAZ;TLR2;MCL1
Ascorbate and aldarate metabolism	2021-01-30	0.404179	0.83988	0	0	1.98493	1.79815	ALDH3A2
Glyoxylate and dicarboxylate metabolism	2021-01-30	0.404179	0.83988	0	0	1.98493	1.79815	AMT
Pentose phosphate pathway	2021-01-30	0.404179	0.83988	0	0	1.98493	1.79815	PGLS
Peroxisome	1982-02-01	0.410396	0.83988	0	0	1.43956	1.28212	HMGCL;PEX11B
Shigellosis	5/246	0.412026	0.83988	0	0	1.19538	1.0599	RRAGA;TBK1;PLCG2;RAC1;UBE2V1
Circadian rhythm	2021-01-31	0.414383	0.83988	0	0	1.91867	1.69028	RORB
RNA polymerase	2021-01-31	0.414383	0.83988	0	0	1.91867	1.69028	POLR2F
Insulin signaling pathway	3/137	0.416325	0.83988	0	0	1.28939	1.12988	SHC1;INPPL1;KRAS
Chemokine signaling pathway	4/192	0.41677	0.83988	0	0	1.22561	1.07268	SHC1;PLCG2;KRAS;RAC1
Ubiquitin mediated proteolysis	3/140	0.429958	0.83988	0	0	1.26097	1.06434	PIAS3;UBE2Q1;BIRC2
Colorectal cancer	1986-02-01	0.43399	0.83988	0	0	1.37073	1.14419	KRAS;RAC1
Insulin secretion	1986-02-01	0.43399	0.83988	0	0	1.37073	1.14419	ATP1A3;CACNA1C
SNARE interactions in vesicular transport	1933-01-01	0.43427	0.83988	0	0	1.79857	1.50017	STX3
MicroRNAs in cancer	6/310	0.437536	0.83988	0	0	1.13687	0.939729	SHC1;PLCG2;TNR;KRAS;PAK4;MCL1
Cardiac muscle contraction	1987-02-01	0.439809	0.83988	0	0	1.35453	1.11263	ATP1A3;CACNA1C
ECM-receptor interaction	1988-02-01	0.445596	0.83988	0	0	1.33871	1.08214	COL4A2;TNR
PD-L1 expression and PD-1 checkpoint pathway in cancer	1989-02-01	0.451349	0.83988	0	0	1.32326	1.05267	KRAS;TLR2
Nicotinate and nicotinamide metabolism	1935-01-01	0.453485	0.83988	0	0	1.6926	1.3385	SIRT7
Tyrosine metabolism	1936-01-01	0.462847	0.83988	0	0	1.64416	1.26659	ALDH3A1
Retrograde endocannabinoid signaling	3/148	0.465719	0.83988	0	0	1.19091	0.910059	CACNA1B;CACNA1C;NDUFV3
Proteoglycans in cancer	4/205	0.466039	0.83988	0	0	1.14557	0.874631	PLCG2;KRAS;RAC1;TLR2
Small cell lung cancer	1992-02-01	0.468402	0.83988	0	0	1.27895	0.969995	COL4A2;BIRC2
Gastric cancer	3/149	0.470121	0.83988	0	0	1.18269	0.892653	TERT;SHC1;KRAS
Thyroid cancer	1937-01-01	0.472049	0.83988	0	0	1.5984	1.19988	KRAS
GnRH signaling pathway	1993-02-01	0.474016	0.83988	0	0	1.26484	0.944216	KRAS;CACNA1C
Rheumatoid arthritis	1993-02-01	0.474016	0.83988	0	0	1.26484	0.944216	LTB;TLR2
Salivary secretion	1993-02-01	0.474016	0.83988	0	0	1.26484	0.944216	PRB1;ATP1A3
Allograft rejection	1938-01-01	0.481093	0.83988	0	0	1.55512	1.13788	HLA-B
Primary immunodeficiency	1938-01-01	0.481093	0.83988	0	0	1.55512	1.13788	TAP1
Cushing syndrome	3/155	0.49618	0.83988	0	0	1.13565	0.795885	ARMC5;ASH2L;CACNA1C
Glycine, serine and threonine metabolism	1940-01-01	0.498722	0.83988	0	0	1.47522	1.02632	AMT
Nicotine addiction	1940-01-01	0.498722	0.83988	0	0	1.47522	1.02632	CACNA1B
Choline metabolism in cancer	1998-02-01	0.501541	0.83988	0	0	1.19865	0.827154	KRAS;RAC1
mRNA surveillance pathway	1998-02-01	0.501541	0.83988	0	0	1.19865	0.827154	SSU72;PABPC3
cAMP signaling pathway	4/216	0.506534	0.83988	0	0	1.08552	0.738332	ATP1A3;RAC1;CACNA1C;HCN2
Bladder cancer	1941-01-01	0.507311	0.83988	0	0	1.43827	0.976055	KRAS
Ferroptosis	1941-01-01	0.507311	0.83988	0	0	1.43827	0.976055	FTMT
Regulation of actin cytoskeleton	4/218	0.513752	0.83988	0	0	1.07526	0.716142	KRAS;RAC1;IQGAP3;PAK4
Graft-versus-host disease	1942-01-01	0.515753	0.83988	0	0	1.40312	0.929043	HLA-B
Tryptophan metabolism	1942-01-01	0.515753	0.83988	0	0	1.40312	0.929043	ALDH3A2
Human T-cell leukemia virus 1 infection	4/219	0.517343	0.83988	0	0	1.07021	0.70532	TERT;HLA-B;TBPL1;KRAS
Amoebiasis	2/102	0.522884	0.83988	0	0	1.15047	0.745961	COL4A2;TLR2
Fatty acid degradation	1943-01-01	0.524051	0.83988	0	0	1.36964	0.885016	ALDH3A2
Type I diabetes mellitus	1943-01-01	0.524051	0.83988	0	0	1.36964	0.885016	HLA-B
JAK-STAT signaling pathway	3/162	0.525752	0.83988	0	0	1.08527	0.697747	PIAS3;FHL1;MCL1
Vasopressin-regulated water reabsorption	1944-01-01	0.532207	0.841392	0	0	1.33772	0.84373	NSF
T cell receptor signaling pathway	2/104	0.533323	0.841392	0	0	1.1278	0.708965	KRAS;PAK4
ABC transporters	1945-01-01	0.540224	0.841822	0	0	1.30725	0.804968	TAP1
Glycosphingolipid biosynthesis	1945-01-01	0.540224	0.841822	0	0	1.30725	0.804968	A4GALT
Parathyroid hormone synthesis, secretion and action	2/106	0.543606	0.841926	0	0	1.106	0.674139	SLC34A3;SLC9A3R1
Carbohydrate digestion and absorption	1947-01-01	0.555849	0.846389	0	0	1.25029	0.734241	ATP1A3
Pyruvate metabolism	1947-01-01	0.555849	0.846389	0	0	1.25029	0.734241	ALDH3A2
Protein processing in endoplasmic reticulum	3/171	0.562324	0.846389	0	0	1.02665	0.591021	EDEM3;PLAA;DERL2
MAPK signaling pathway	5/294	0.567165	0.846389	0	0	0.994373	0.563914	CACNA1B;KRAS;RAC1;CACNA1C;IRAK4
Ether lipid metabolism	1949-01-01	0.570945	0.846389	0	0	1.19807	0.671473	PAFAH1B2
Arginine and proline metabolism	1950-01-01	0.5783	0.846389	0	0	1.17356	0.642715	ALDH3A2
Malaria	1950-01-01	0.5783	0.846389	0	0	1.17356	0.642715	TLR2
N-Glycan biosynthesis	1950-01-01	0.5783	0.846389	0	0	1.17356	0.642715	DOLK
Vibrio cholerae infection	1950-01-01	0.5783	0.846389	0	0	1.17356	0.642715	PLCG2
Glutamatergic synapse	2/114	0.583142	0.846389	0	0	1.02658	0.553657	GRIK5;CACNA1C
Leukocyte transendothelial migration	2/114	0.583142	0.846389	0	0	1.02658	0.553657	PLCG2;RAC1
Autoimmune thyroid disease	1953-01-01	0.599618	0.860004	0	0	1.10568	0.565515	HLA-B
Glycosaminoglycan biosynthesis	1953-01-01	0.599618	0.860004	0	0	1.10568	0.565515	CHST11
Huntington disease	5/306	0.60268	0.860004	0	0	0.954139	0.483146	CACNA1B;TBPL1;POLR2F;NDUFV3;AP2M1
Regulation of lipolysis in adipocytes	1955-01-01	0.61323	0.870171	0	0	1.06462	0.520617	PNPLA2
Legionellosis	1957-01-01	0.626381	0.883893	0	0	1.0265	0.480192	TLR2
Endometrial cancer	1958-01-01	0.632788	0.888001	0	0	1.00844	0.461481	KRAS
Long-term depression	1960-01-01	0.645276	0.900549	0	0	0.974154	0.426755	KRAS
Oocyte meiosis	2/129	0.650332	0.901952	0	0	0.904632	0.389238	FBXO5;YWHAZ
FoxO signaling pathway	2/131	0.658611	0.901952	0	0	0.890515	0.371899	TNFSF10;KRAS
Dopaminergic synapse	2/132	0.662692	0.901952	0	0	0.88362	0.363561	CACNA1B;CACNA1C
Lysine degradation	1963-01-01	0.663217	0.901952	0	0	0.926875	0.380624	ALDH3A2
Cortisol synthesis and secretion	1965-01-01	0.674673	0.901952	0	0	0.897819	0.353316	CACNA1C
Inflammatory bowel disease	1965-01-01	0.674673	0.901952	0	0	0.897819	0.353316	TLR2
Aminoacyl-tRNA biosynthesis	1966-01-01	0.680254	0.901952	0	0	0.883961	0.340581	LARS2
Acute myeloid leukemia	1967-01-01	0.68574	0.901952	0	0	0.870523	0.328411	KRAS
Prion disease	4/273	0.689406	0.901952	0	0	0.852995	0.31725	CACNA1B;RAC1;CACNA1C;NDUFV3
Retinol metabolism	1968-01-01	0.691132	0.901952	0	0	0.857487	0.316777	CYP2S1
Amphetamine addiction	1969-01-01	0.696431	0.901952	0	0	0.844834	0.305649	CACNA1C
Renin secretion	1969-01-01	0.696431	0.901952	0	0	0.844834	0.305649	CACNA1C
Rap1 signaling pathway	3/210	0.699579	0.901952	0	0	0.831559	0.297097	KRAS;PRKD1;RAC1
Central carbon metabolism in cancer	1970-01-01	0.70164	0.901952	0	0	0.832547	0.295	KRAS
RIG-I-like receptor signaling pathway	1970-01-01	0.70164	0.901952	0	0	0.832547	0.295	TBK1
Spinocerebellar ataxia	2/143	0.705023	0.901952	0	0	0.814226	0.284592	GTF2B;TBPL1
Adherens junction	1971-01-01	0.70676	0.901952	0	0	0.820612	0.284805	RAC1
Melanoma	1972-01-01	0.711792	0.901952	0	0	0.809012	0.275039	KRAS
Breast cancer	2/147	0.719284	0.901952	0	0	0.791602	0.260832	SHC1;KRAS
Thyroid hormone synthesis	1975-01-01	0.726378	0.901952	0	0	0.776096	0.248106	ATP1A3
Adrenergic signaling in cardiomyocytes	2/150	0.729596	0.901952	0	0	0.775437	0.244467	ATP1A3;CACNA1C
Gastric acid secretion	1976-01-01	0.731075	0.901952	0	0	0.765709	0.23985	ATP1A3
Pertussis	1976-01-01	0.731075	0.901952	0	0	0.765709	0.23985	IRAK4
Arrhythmogenic right ventricular cardiomyopathy	1977-01-01	0.735691	0.901952	0	0	0.755595	0.231926	CACNA1C
Oxytocin signaling pathway	2/154	0.742845	0.901952	0	0	0.754876	0.2244	KRAS;CACNA1C
mTOR signaling pathway	2/154	0.742845	0.901952	0	0	0.754876	0.2244	RRAGA;KRAS
Cytokine-cytokine receptor interaction	4/295	0.745679	0.901952	0	0	0.787613	0.231133	IL34;TNFSF10;TNFRSF10B;LTB
Non-alcoholic fatty liver disease	2/155	0.746069	0.901952	0	0	0.749904	0.219674	NDUFV3;RAC1
Cellular senescence	2/156	0.749259	0.901952	0	0	0.744996	0.215058	HLA-B;KRAS
Ribosome	2/158	0.755535	0.905217	0	0	0.73537	0.206145	RPL26;RPL3L
Thermogenesis	3/232	0.761273	0.907809	0	0	0.750821	0.204796	KRAS;NDUFV3;PNPLA2
Hippo signaling pathway	2/163	0.770637	0.910913	0	0	0.712349	0.185594	YWHAZ;BIRC2
Chemical carcinogenesis	3/239	0.778622	0.910913	0	0	0.728289	0.182239	CACNA1B;KRAS;CACNA1C
Gap junction	1988-01-01	0.781539	0.910913	0	0	0.659689	0.162607	KRAS
cGMP-PKG signaling pathway	2/167	0.782128	0.910913	0	0	0.694938	0.170772	ATP1A3;CACNA1C
Tight junction	2/169	0.787682	0.910913	0	0	0.686545	0.163851	SLC9A3R1;RAC1
Bile secretion	1990-01-01	0.788979	0.910913	0	0	0.644799	0.152827	ATP1A3
Hypertrophic cardiomyopathy	1990-01-01	0.788979	0.910913	0	0	0.644799	0.152827	CACNA1C
Morphine addiction	1991-01-01	0.792604	0.910957	0	0	0.637602	0.148199	CACNA1B
IL-17 signaling pathway	1994-01-01	0.80311	0.912709	0	0	0.616939	0.135272	TBK1
Dilated cardiomyopathy	1996-01-01	0.809818	0.912709	0	0	0.603889	0.127388	CACNA1C
Circadian entrainment	1997-01-01	0.813085	0.912709	0	0	0.597568	0.123648	CACNA1C
Prostate cancer	1997-01-01	0.813085	0.912709	0	0	0.597568	0.123648	KRAS
Inflammatory mediator regulation of TRP channels	1998-01-01	0.816297	0.912709	0	0	0.591378	0.120036	PLCG2
Progesterone-mediated oocyte maturation	1/100	0.822557	0.912709	0	0	0.579371	0.113173	KRAS
Pathways of neurodegeneration	6/475	0.825336	0.912709	0	0	0.73062	0.140253	TBK1;CACNA1B;KRAS;RAC1;CACNA1C;NDUFV3
Melanogenesis	1/101	0.825606	0.912709	0	0	0.573548	0.109913	KRAS
Longevity regulating pathway	1/102	0.828603	0.912709	0	0	0.567841	0.106762	KRAS
Alcoholism	2/186	0.830062	0.912709	0	0	0.62257	0.115956	SHC1;KRAS
Transcriptional misregulation in cancer	2/192	0.843103	0.916771	0	0	0.602724	0.102864	HOXA9;BIRC2
Drug metabolism	1/108	0.845538	0.916771	0	0	0.535835	0.0899033	ALDH3A1
Ribosome biogenesis in eukaryotes	1/108	0.845538	0.916771	0	0	0.535835	0.0899033	RPP38
HIF-1 signaling pathway	1/109	0.848194	0.916771	0	0	0.530846	0.0874017	PLCG2
Diabetic cardiomyopathy	2/203	0.86468	0.93063	0	0	0.569418	0.0827909	RAC1;NDUFV3
Amyotrophic lateral sclerosis	4/364	0.872259	0.93336	0	0	0.634385	0.0867009	TBK1;NUP98;RAC1;NDUFV3
AMPK signaling pathway	1/120	0.874566	0.93336	0	0	0.481505	0.0645352	RAB10
Cell cycle	1/124	0.882977	0.934484	0	0	0.465751	0.0579654	YWHAZ
Platelet activation	1/124	0.882977	0.934484	0	0	0.465751	0.0579654	PLCG2
Purine metabolism	1/129	0.892706	0.935593	0	0	0.447443	0.0507841	GUK1
Pathways in cancer	6/531	0.894306	0.935593	0	0	0.650782	0.0726972	TERT;COL4A2;PLCG2;KRAS;RAC1;BIRC2
Oxidative phosphorylation	1/133	0.899904	0.935593	0	0	0.433795	0.0457512	NDUFV3
Vascular smooth muscle contraction	1/133	0.899904	0.935593	0	0	0.433795	0.0457512	CACNA1C
Systemic lupus erythematosus	1/135	0.903321	0.935593	0	0	0.427277	0.0434446	FCGR3A
Apelin signaling pathway	1/137	0.906621	0.935593	0	0	0.42095	0.0412662	KRAS
Fluid shear stress and atherosclerosis	1/139	0.909809	0.935593	0	0	0.414807	0.0392079	RAC1
Signaling pathways regulating pluripotency of stem cells	1/143	0.915863	0.938021	0	0	0.40304	0.0354227	KRAS
Cell adhesion molecules	1/148	0.922863	0.940306	0	0	0.389231	0.0312452	HLA-B
Spliceosome	1/150	0.925498	0.940306	0	0	0.383967	0.0297279	DDX23
Wnt signaling pathway	1/166	0.94359	0.954867	0	0	0.34645	0.0201163	RAC1
Alzheimer disease	3/369	0.953259	0.960825	0	0	0.466464	0.0223289	KRAS;CACNA1C;NDUFV3
Parkinson disease	1/249	0.986722	0.990622	0	0	0.229519	0.00306798	NDUFV3
Olfactory transduction	1/440	0.999532	0.999532	0	0	0.128384	6.00405e-05	OR7C2

## Sheet: KEGG_p<0.05
Term	Nº genes	Overlap	P-value <0.05	Adjusted P-value	Old P-value	Old Adjusted P-value	Odds Ratio	Combined Score	Genes
Natural killer cell mediated cytotoxicity	8	8/131	0.00188639	0.196768	0	0	3.8041	23.8635	FCGR3A;SHC1;TNFSF10;HLA-B;PLCG2;TNFRSF10B;KRAS;RAC1
Synaptic vesicle cycle	6	1978-06-01	0.00218636	0.196768	0	0	4.85764	29.7556	NSF;CACNA1B;STX3;SLC6A2;AP2M1;DNM1
Base excision repair	4	1933-04-01	0.00232403	0.196768	0	0	8.0102	48.5775	POLD4;PARP4;POLE3;HMGB1
Apoptosis	8	8/142	0.00311464	0.19778	0	0	3.48986	20.1422	PARP4;DIABLO;TNFSF10;TNFRSF10B;KRAS;CFLAR;BIRC2;MCL1
Basal transcription factors	4	1945-04-01	0.00720953	0.291478	0	0	5.66229	27.9284	TAF6L;GTF2B;TBPL1;GTF2E1
Sulfur relay system	2	2021-02-08	0.00762598	0.291478	0	0	19.2667	93.948	NFS1;MOCS3
Toll-like receptor signaling pathway	6	6/104	0.00894346	0.291478	0	0	3.56414	16.8115	TLR1;TBK1;RAC1;IRAK4;TLR6;TLR2
Salmonella infection	10	10/249	0.0109063	0.291478	0	0	2.44732	11.058	ANXA2;MLKL;MYO6;TNFSF10;TNFRSF10B;RAC1;TLR6;IRAK4;BIRC2;TLR2
Human immunodeficiency virus 1 infection	9	9/212	0.010993	0.291478	0	0	2.5902	11.6831	TBK1;HLA-B;PLCG2;TAP1;KRAS;RAC1;IRAK4;TLR2;PAK4
Herpes simplex virus 1 infection	16	16/498	0.0122343	0.291478	0	0	1.9526	8.59829	ZNF133;EIF2B5;ZNF792;RNASEL;HLA-B;TAP1;ZNF3;IRAK4;TBK1;ZNF714;ZNF615;ZNF768;ZNF205;ZNF564;BIRC2;TLR2
B cell receptor signaling pathway	5	1981-05-01	0.0126231	0.291478	0	0	3.82282	16.7142	IFITM1;INPPL1;PLCG2;KRAS;RAC1
Phagosome	7	7/152	0.0158253	0.334968	0	0	2.81196	11.6588	FCGR3A;CD209;HLA-B;TAP1;RAC1;TLR6;TLR2
Influenza A	7	7/172	0.028775	0.472409	0	0	2.46858	8.75915	RNASEL;TBK1;TNFSF10;TNFRSF10B;NUP98;IRAK4;PRSS2
Endocytosis	9	9/252	0.0299052	0.472409	0	0	2.15938	7.57883	RAB10;TSG101;CAPZA1;PSD4;RAB35;HLA-B;VPS26B;AP2M1;DNM1
Lipid and atherosclerosis	8	8/215	0.032059	0.472409	0	0	2.25069	7.74276	TBK1;TNFSF10;TNFRSF10B;KRAS;RAC1;TLR6;IRAK4;TLR2
Homologous recombination	3	1941-03-01	0.0327459	0.472409	0	0	4.56917	15.6219	TOP3B;POLD4;TOP3A
NF-kappa B signaling pathway	5	5/104	0.033121	0.472409	0	0	2.93124	9.98846	PLCG2;IRAK4;LTB;CFLAR;BIRC2
Nitrogen metabolism	2	2021-02-17	0.0334778	0.472409	0	0	7.70314	26.1666	CA6;CA14
Other glycan degradation	2	2021-02-18	0.0372447	0.497903	0	0	7.22132	23.7599	MANBA;FUCA1

## Sheet: Black-Reactome_2016_table
Term	Overlap	P-value	Adjusted P-value	Old P-value	Old Adjusted P-value	Odds Ratio	Combined Score	Genes
Regulated Necrosis Homo sapiens R-HSA-5218859	2021-05-16	5.31186e-06	0.00191758	0	0	26.4999	321.856	MLKL;TNFSF10;TNFRSF10B;CFLAR;BIRC2
RIPK1-mediated regulated necrosis Homo sapiens R-HSA-5213460	2021-05-16	5.31186e-06	0.00191758	0	0	26.4999	321.856	MLKL;TNFSF10;TNFRSF10B;CFLAR;BIRC2
MyD88 deficiency (TLR2/4) Homo sapiens R-HSA-5602498	2021-04-11	2.52137e-05	0.00455106	0	0	33.2223	351.762	TLR1;IRAK4;TLR6;TLR2
IRAK4 deficiency (TLR2/4) Homo sapiens R-HSA-5603041	2021-04-11	2.52137e-05	0.00455106	0	0	33.2223	351.762	TLR1;IRAK4;TLR6;TLR2
Toll Like Receptor 4 (TLR4) Cascade Homo sapiens R-HSA-166016	10/122	4.74711e-05	0.00685483	0	0	5.25656	52.3311	TLR1;TBK1;PLCG2;UBE2V1;HMGB1;IRAK4;TLR6;DNM1;BIRC2;TLR2
Regulation of necroptotic cell death Homo sapiens R-HSA-5675482	2021-04-14	7.34342e-05	0.00883658	0	0	23.2521	221.339	TNFSF10;TNFRSF10B;CFLAR;BIRC2
Toll-Like Receptors Cascades Homo sapiens R-HSA-168898	10/140	0.00015077	0.0148776	0	0	4.52456	39.815	TLR1;TBK1;PLCG2;UBE2V1;HMGB1;IRAK4;TLR6;DNM1;BIRC2;TLR2
TRAIL signaling Homo sapiens R-HSA-75158	2021-03-07	0.000164849	0.0148776	0	0	43.4823	378.752	TNFSF10;TNFRSF10B;CFLAR
RNA polymerase II transcribes snRNA genes Homo sapiens R-HSA-6807505	1977-07-01	0.000346639	0.0278082	0	0	5.84716	46.5857	ZNF143;CCNK;GTF2B;POLR2F;RPRD1B;RPAP2;GTF2E1
Gap junction degradation Homo sapiens R-HSA-190873	2021-03-10	0.000544001	0.033327	0	0	24.8432	186.736	MYO6;DNM1;AP2M1
Diseases associated with the TLR signaling cascade Homo sapiens R-HSA-5602358	2021-04-24	0.000681052	0.033327	0	0	11.6201	84.7324	TLR1;IRAK4;TLR6;TLR2
Diseases of Immune System Homo sapiens R-HSA-5260271	2021-04-24	0.000681052	0.033327	0	0	11.6201	84.7324	TLR1;IRAK4;TLR6;TLR2
Activated TLR4 signalling Homo sapiens R-HSA-166054	8/112	0.00068514	0.033327	0	0	4.50345	32.8117	TLR1;TBK1;UBE2V1;HMGB1;IRAK4;TLR6;BIRC2;TLR2
CASP8 activity is inhibited Homo sapiens R-HSA-5218900	2021-03-11	0.000738548	0.033327	0	0	21.7367	156.74	TNFSF10;TNFRSF10B;CFLAR
Regulation by c-FLIP Homo sapiens R-HSA-3371378	2021-03-11	0.000738548	0.033327	0	0	21.7367	156.74	TNFSF10;TNFRSF10B;CFLAR
Dimerization of procaspase-8 Homo sapiens R-HSA-69416	2021-03-11	0.000738548	0.033327	0	0	21.7367	156.74	TNFSF10;TNFRSF10B;CFLAR
Membrane Trafficking Homo sapiens R-HSA-199991	17/420	0.000974343	0.0413809	0	0	2.49922	17.3289	NSF;TSG101;GCC1;CLINT1;AP4B1;YWHAZ;NAPG;DNM1;RAB10;GOLGA1;MYO6;TMED3;KIF1C;EXOC3;RAC1;PAFAH1B2;AP2M1
Advanced glycosylation endproduct receptor signaling Homo sapiens R-HSA-879415	2021-03-13	0.00124803	0.05006	0	0	17.3876	116.257	LGALS3;CAPZA1;HMGB1
Death Receptor Signalling Homo sapiens R-HSA-73887	1948-05-01	0.00133045	0.050557	0	0	6.76799	44.8193	TNFSF10;TNFRSF10B;CFLAR;BIRC2;NSMAF
Vesicle-mediated transport Homo sapiens R-HSA-5653656	18/492	0.00215184	0.0776814	0	0	2.24848	13.8089	NSF;TSG101;GCC1;CLINT1;AP4B1;YWHAZ;NAPG;DNM1;RAB10;COL4A2;GOLGA1;MYO6;TMED3;KIF1C;EXOC3;RAC1;PAFAH1B2;AP2M1
Programmed Cell Death Homo sapiens R-HSA-5357801	9/166	0.00227835	0.0783318	0	0	3.35703	20.4252	MLKL;DIABLO;TNFSF10;TNFRSF10B;HIST1H1E;HMGB1;CFLAR;YWHAZ;BIRC2
Ligand-dependent caspase activation Homo sapiens R-HSA-140534	2021-03-17	0.0028207	0.0925702	0	0	12.4172	72.8985	TNFSF10;TNFRSF10B;CFLAR
Molybdenum cofactor biosynthesis Homo sapiens R-HSA-947581	2021-02-06	0.00417894	0.131182	0	0	28.9029	158.322	NFS1;MOCS3
MyD88:Mal cascade initiated on plasma membrane Homo sapiens R-HSA-166058	1992-06-01	0.00497775	0.133109	0	0	4.06395	21.5502	TLR1;HMGB1;IRAK4;TLR6;UBE2V1;TLR2
Toll Like Receptor TLR1:TLR2 Cascade Homo sapiens R-HSA-168179	1992-06-01	0.00497775	0.133109	0	0	4.06395	21.5502	TLR1;HMGB1;IRAK4;TLR6;UBE2V1;TLR2
Toll Like Receptor TLR6:TLR2 Cascade Homo sapiens R-HSA-168188	1992-06-01	0.00497775	0.133109	0	0	4.06395	21.5502	TLR1;HMGB1;IRAK4;TLR6;UBE2V1;TLR2
Toll Like Receptor 2 (TLR2) Cascade Homo sapiens R-HSA-181438	1992-06-01	0.00497775	0.133109	0	0	4.06395	21.5502	TLR1;HMGB1;IRAK4;TLR6;UBE2V1;TLR2
Deactivation of the beta-catenin transactivating complex Homo sapiens R-HSA-3769402	1942-04-01	0.00563672	0.145347	0	0	6.11025	31.6416	SOX3;SOX13;ASH2L;YWHAZ
Inositol phosphate metabolism Homo sapiens R-HSA-1483249	1944-04-01	0.00665666	0.165728	0	0	5.80414	29.0912	ITPKC;INPPL1;PLCG2;IP6K1
Apoptosis Homo sapiens R-HSA-109581	8/163	0.0070991	0.170852	0	0	3.01379	14.9116	DIABLO;TNFSF10;TNFRSF10B;HIST1H1E;HMGB1;CFLAR;YWHAZ;BIRC2
Synthesis of IP3 and IP4 in the cytosol Homo sapiens R-HSA-1855204	2021-03-25	0.00862539	0.200544	0	0	7.89863	37.5426	ITPKC;INPPL1;PLCG2
PTK6 Regulates RHO GTPases, RAS GTPase and MAP kinases Homo sapiens R-HSA-8849471	2021-03-26	0.00962878	0.200544	0	0	7.55483	35.0771	RASA4;KRAS;RAC1
Formation of annular gap junctions Homo sapiens R-HSA-196025	2021-02-09	0.00969465	0.200544	0	0	16.5134	76.5593	DNM1;AP2M1
SHC-related events triggered by IGF1R Homo sapiens R-HSA-2428933	2021-02-09	0.00969465	0.200544	0	0	16.5134	76.5593	SHC1;KRAS
Retrograde transport at the Trans-Golgi-Network Homo sapiens R-HSA-6811440	1949-04-01	0.00972165	0.200544	0	0	5.15792	23.8987	NSF;GOLGA1;GCC1;NAPG
Caspase activation via extrinsic apoptotic signalig pathway Homo sapiens R-HSA-5357769	2021-03-27	0.0106973	0.214541	0	0	7.23968	32.8519	TNFSF10;TNFRSF10B;CFLAR
Cargo trafficking to the periciliary membrane Homo sapiens R-HSA-5620920	1951-04-01	0.0111663	0.216281	0	0	4.93793	22.1953	EXOC3;NPHP3;PKD1;SSTR3
Gap junction trafficking Homo sapiens R-HSA-190828	2021-03-28	0.0118318	0.216281	0	0	6.94973	30.8357	MYO6;AP2M1;DNM1
Innate Immune System Homo sapiens R-HSA-168249	23/807	0.0119753	0.216281	0	0	1.73574	7.6805	SHC1;HLA-B;HMGB1;IRAK4;MEFV;GFRA2;DNM1;TLR1;LGALS3;FCGR3A;TBK1;CD209;RASA4;CAPZA1;PLCG2;POLR2F;KRAS;RAC1;TLR6;UBE2V1;PRSS2;BIRC2;TLR2
ER Quality Control Compartment (ERQC) Homo sapiens R-HSA-901032	2021-02-10	0.0119823	0.216281	0	0	14.4485	63.925	EDEM3;DERL2
Gap junction trafficking and regulation Homo sapiens R-HSA-157858	2021-03-30	0.0143008	0.243145	0	0	6.43428	27.3292	MYO6;AP2M1;DNM1
RHO GTPases activate IQGAPs Homo sapiens R-HSA-5626467	2021-02-11	0.0144809	0.243145	0	0	12.8425	54.3869	RAC1;IQGAP3
TRAF6 mediated IRF7 activation in TLR7/8 or 9 signaling Homo sapiens R-HSA-975110	2021-02-11	0.0144809	0.243145	0	0	12.8425	54.3869	UBE2V1;IRAK4
Trafficking of AMPA receptors Homo sapiens R-HSA-399719	2021-03-31	0.0156364	0.250877	0	0	6.20417	25.7979	NSF;MYO6;AP2M1
Glutamate Binding, Activation of AMPA Receptors and Synaptic Plasticity Homo sapiens R-HSA-399721	2021-03-31	0.0156364	0.250877	0	0	6.20417	25.7979	NSF;MYO6;AP2M1
Signaling by Robo receptor Homo sapiens R-HSA-376176	1932-03-01	0.0170398	0.263955	0	0	5.98993	24.3922	ROBO3;RAC1;PAK4
Reversible hydration of carbon dioxide Homo sapiens R-HSA-1475029	2021-02-12	0.0171827	0.263955	0	0	11.5576	46.9686	CA6;CA14
Translocation of GLUT4 to the plasma membrane Homo sapiens R-HSA-1445148	1960-04-01	0.0193462	0.284268	0	0	4.14243	16.343	RAB10;EXOC3;RAC1;YWHAZ
Retrograde neurotrophin signalling Homo sapiens R-HSA-177504	2021-02-13	0.0200799	0.284268	0	0	10.5064	41.0595	DNM1;AP2M1
Activation of DNA fragmentation factor Homo sapiens R-HSA-211227	2021-02-13	0.0200799	0.284268	0	0	10.5064	41.0595	HIST1H1E;HMGB1
Apoptosis induced DNA fragmentation Homo sapiens R-HSA-140342	2021-02-13	0.0200799	0.284268	0	0	10.5064	41.0595	HIST1H1E;HMGB1
Late Phase of HIV Life Cycle Homo sapiens R-HSA-162599	6/128	0.0228409	0.314038	0	0	2.85948	10.8066	CCNK;TSG101;GTF2B;POLR2F;NUP98;GTF2E1
Activation of Rac Homo sapiens R-HSA-428540	2021-02-14	0.0231652	0.314038	0	0	9.63039	36.2594	RAC1;PAK4
RNA Polymerase II Pre-transcription Events Homo sapiens R-HSA-674695	1964-04-01	0.0239153	0.314038	0	0	3.86548	14.4308	CCNK;GTF2B;POLR2F;GTF2E1
Immune System Homo sapiens R-HSA-168256	37/1547	0.0240746	0.314038	0	0	1.45799	5.43333	IFITM1;RNASEL;RNF34;SHC1;INPPL1;HMGB1;MEFV;LGALS3;FCGR3A;TBK1;UBE2Q1;PLCG2;POLR2F;RAC1;STX3;CTSE;PRSS2;AP2M1;IL34;HLA-B;TAP1;IRAK4;GFRA2;YWHAZ;DNM1;TLR1;TRIM39;CD209;RASA4;CAPZA1;KRAS;NUP98;TLR6;UBE2V1;LTB;BIRC2;TLR2
Disease Homo sapiens R-HSA-1643685	20/725	0.0249907	0.314038	0	0	1.66979	6.16029	CCNK;TSG101;SHC1;GTF2B;DERL2;IRAK4;GTF2E1;RPL3L;TLR1;ADAMTSL5;POLR2F;KRAS;RPL26;NUP98;RAC1;TLR6;AP2M1;CD320;TLR2;ADAMTS7
NCAM1 interactions Homo sapiens R-HSA-419037	1937-03-01	0.0250821	0.314038	0	0	5.10776	18.8252	COL4A2;CACNA1C;GFRA2
Calnexin/calreticulin cycle Homo sapiens R-HSA-901042	2021-02-15	0.0264312	0.314038	0	0	8.88914	32.2961	EDEM3;DERL2
Signaling by EGFRvIII in Cancer Homo sapiens R-HSA-5637812	2021-02-15	0.0264312	0.314038	0	0	8.88914	32.2961	SHC1;KRAS
Constitutive Signaling by EGFRvIII Homo sapiens R-HSA-5637810	2021-02-15	0.0264312	0.314038	0	0	8.88914	32.2961	SHC1;KRAS
Metabolism of water-soluble vitamins and cofactors Homo sapiens R-HSA-196849	1998-05-01	0.0265323	0.314038	0	0	3.12131	11.3285	NFS1;MOCS3;CARKD;COASY;CD320
Transcription of the HIV genome Homo sapiens R-HSA-167172	1967-04-01	0.0277361	0.322991	0	0	3.68085	13.1959	CCNK;GTF2B;POLR2F;GTF2E1
Gene Expression Homo sapiens R-HSA-74160	38/1631	0.0318503	0.349663	0	0	1.41753	4.88581	ZNF133;ZNF792;CCNK;BTG2;RNF34;VARS;GTF2B;DDX23;ZNF3;RORB;RPAP2;GTF2E1;HIST2H2AC;POLR2F;LCMT2;ZNF205;RPRD1B;SNRNP35;RPP38;ZNF564;RBM5;ZNF266;EIF2B5;ZNF143;TOP3A;TNFRSF10B;ZNF75D;YWHAZ;RPL3L;LARS2;RRAGA;ZNF839;ZNF714;ZNF615;CD2BP2;RPL26;NUP98;ZNF655
TNF receptor superfamily (TNFSF) members mediating non-canonical NF-kB pathway Homo sapiens R-HSA-5676594	2021-02-17	0.0334778	0.349663	0	0	7.70314	26.1666	LTB;BIRC2
Trafficking of GluR2-containing AMPA receptors Homo sapiens R-HSA-416993	2021-02-17	0.0334778	0.349663	0	0	7.70314	26.1666	NSF;AP2M1
N-glycan trimming in the ER and Calnexin/Calreticulin cycle Homo sapiens R-HSA-532668	2021-02-17	0.0334778	0.349663	0	0	7.70314	26.1666	EDEM3;DERL2
HIV Life Cycle Homo sapiens R-HSA-162587	6/141	0.0344429	0.349663	0	0	2.58241	8.69872	CCNK;TSG101;GTF2B;POLR2F;NUP98;GTF2E1
Intra-Golgi and retrograde Golgi-to-ER traffic Homo sapiens R-HSA-6811442	7/179	0.0346303	0.349663	0	0	2.36727	7.96119	NSF;GOLGA1;TMED3;KIF1C;GCC1;PAFAH1B2;NAPG
HATs acetylate histones Homo sapiens R-HSA-3214847	5/107	0.0367648	0.349663	0	0	2.84459	9.3963	ING4;TAF6L;VPS72;MORF4L2;HIST2H2AC
SHC-mediated cascade:FGFR3 Homo sapiens R-HSA-5654704	2021-02-18	0.0372447	0.349663	0	0	7.22132	23.7599	SHC1;KRAS
SHC1 events in ERBB2 signaling Homo sapiens R-HSA-1250196	2021-02-18	0.0372447	0.349663	0	0	7.22132	23.7599	SHC1;KRAS
Tie2 Signaling Homo sapiens R-HSA-210993	2021-02-18	0.0372447	0.349663	0	0	7.22132	23.7599	SHC1;KRAS
HIV Infection Homo sapiens R-HSA-162906	8/222	0.0376351	0.349663	0	0	2.17628	7.13781	CCNK;TSG101;GTF2B;POLR2F;NUP98;RAC1;GTF2E1;AP2M1
RNA Polymerase II HIV Promoter Escape Homo sapiens R-HSA-167162	1944-03-01	0.0392027	0.349663	0	0	4.23419	13.7146	GTF2B;POLR2F;GTF2E1
RNA Polymerase II Promoter Escape Homo sapiens R-HSA-73776	1944-03-01	0.0392027	0.349663	0	0	4.23419	13.7146	GTF2B;POLR2F;GTF2E1
RNA Polymerase II Transcription Initiation And Promoter Clearance Homo sapiens R-HSA-76042	1944-03-01	0.0392027	0.349663	0	0	4.23419	13.7146	GTF2B;POLR2F;GTF2E1
RNA Polymerase II Transcription Initiation Homo sapiens R-HSA-75953	1944-03-01	0.0392027	0.349663	0	0	4.23419	13.7146	GTF2B;POLR2F;GTF2E1
RNA Polymerase II Transcription Pre-Initiation And Promoter Opening Homo sapiens R-HSA-73779	1944-03-01	0.0392027	0.349663	0	0	4.23419	13.7146	GTF2B;POLR2F;GTF2E1
HIV Transcription Initiation Homo sapiens R-HSA-167161	1944-03-01	0.0392027	0.349663	0	0	4.23419	13.7146	GTF2B;POLR2F;GTF2E1
Golgi-to-ER retrograde transport Homo sapiens R-HSA-8856688	5/110	0.0406456	0.349663	0	0	2.76289	8.84917	NSF;TMED3;KIF1C;PAFAH1B2;NAPG
Chromatin organization Homo sapiens R-HSA-4839726	8/226	0.0410973	0.349663	0	0	2.13591	6.81743	ING4;PRMT6;TAF6L;VPS72;MORF4L2;HMG20B;ASH2L;HIST2H2AC
Chromatin modifying enzymes Homo sapiens R-HSA-3247509	8/226	0.0410973	0.349663	0	0	2.13591	6.81743	ING4;PRMT6;TAF6L;VPS72;MORF4L2;HMG20B;ASH2L;HIST2H2AC
Constitutive Signaling by Ligand-Responsive EGFR Cancer Variants Homo sapiens R-HSA-1236382	2021-02-19	0.0411654	0.349663	0	0	6.79619	21.6809	SHC1;KRAS
Signaling by Ligand-Responsive EGFR Variants in Cancer Homo sapiens R-HSA-5637815	2021-02-19	0.0411654	0.349663	0	0	6.79619	21.6809	SHC1;KRAS
Signaling by EGFR in Cancer Homo sapiens R-HSA-1643713	2021-02-19	0.0411654	0.349663	0	0	6.79619	21.6809	SHC1;KRAS
Defensins Homo sapiens R-HSA-1461973	1947-03-01	0.0462548	0.383861	0	0	3.94489	12.125	TLR1;PRSS2;TLR2
Nucleotide-binding domain, leucine rich repeat containing receptor (NLR) signaling pathways Homo sapiens R-HSA-168643	1947-03-01	0.0462548	0.383861	0	0	3.94489	12.125	UBE2V1;MEFV;BIRC2
EPH-ephrin mediated repulsion of cells Homo sapiens R-HSA-3928665	1948-03-01	0.0487353	0.388018	0	0	3.85703	11.6534	RAC1;AP2M1;DNM1
CD209 (DC-SIGN) signaling Homo sapiens R-HSA-5621575	2021-02-21	0.0494427	0.388018	0	0	6.08019	18.2828	CD209;KRAS
VxPx cargo-targeting to cilium Homo sapiens R-HSA-5620916	2021-02-21	0.0494427	0.388018	0	0	6.08019	18.2828	EXOC3;PKD1
Aflatoxin activation and detoxification Homo sapiens R-HSA-5423646	2021-02-21	0.0494427	0.388018	0	0	6.08019	18.2828	ACY1;DPEP3
SHC-mediated cascade:FGFR1 Homo sapiens R-HSA-5654688	2021-02-21	0.0494427	0.388018	0	0	6.08019	18.2828	SHC1;KRAS
COPI-dependent Golgi-to-ER retrograde traffic Homo sapiens R-HSA-6811434	1981-04-01	0.0501519	0.389351	0	0	3.00945	9.00639	NSF;TMED3;KIF1C;NAPG
TCF dependent signaling in response to WNT Homo sapiens R-HSA-201681	7/199	0.0555326	0.426538	0	0	2.1185	6.12413	RNF146;SOX3;TERT;SOX13;ASH2L;YWHAZ;HIST2H2AC
Apoptotic execution phase Homo sapiens R-HSA-75153	1951-03-01	0.0565573	0.429835	0	0	3.61541	10.3853	HIST1H1E;HMGB1;BIRC2
SHC-mediated cascade:FGFR4 Homo sapiens R-HSA-5654719	2021-02-23	0.0582612	0.438173	0	0	5.50056	15.6371	SHC1;KRAS
mRNA Splicing - Minor Pathway Homo sapiens R-HSA-72165	1952-03-01	0.0592891	0.441306	0	0	3.54145	10.0058	DDX23;POLR2F;SNRNP35
GPVI-mediated activation cascade Homo sapiens R-HSA-114604	1953-03-01	0.0620819	0.457379	0	0	3.47044	9.6454	SHC1;PLCG2;RAC1
IKK complex recruitment mediated by RIP1 Homo sapiens R-HSA-937041	2021-02-24	0.0628589	0.457724	0	0	5.25027	14.5268	UBE2V1;BIRC2
Generic Transcription Pathway Homo sapiens R-HSA-212436	20/812	0.066093	0.457724	0	0	1.47955	4.01947	ZNF133;ZNF792;CCNK;BTG2;RNF34;TOP3A;TNFRSF10B;ZNF3;RORB;ZNF75D;YWHAZ;RRAGA;ZNF839;ZNF714;ZNF615;POLR2F;ZNF205;ZNF655;ZNF564;ZNF266
Activation of anterior HOX genes in hindbrain development during early embryogenesis Homo sapiens R-HSA-5617472	1989-04-01	0.0663579	0.457724	0	0	2.7251	7.39235	POLR2F;ASH2L;ZNF335;HIST2H2AC
Activation of HOX genes during differentiation Homo sapiens R-HSA-5619507	1989-04-01	0.0663579	0.457724	0	0	2.7251	7.39235	POLR2F;ASH2L;ZNF335;HIST2H2AC
Antigen Presentation: Folding, assembly and peptide loading of class I MHC Homo sapiens R-HSA-983170	2021-02-25	0.0675749	0.457724	0	0	5.02174	13.5312	HLA-B;TAP1
Signaling by Wnt Homo sapiens R-HSA-195721	9/295	0.0678682	0.457724	0	0	1.83066	4.92481	RNF146;SOX3;TERT;SOX13;ASH2L;RAC1;YWHAZ;AP2M1;HIST2H2AC
Cytokine Signaling in Immune system Homo sapiens R-HSA-1280215	16/620	0.068039	0.457724	0	0	1.54829	4.16129	IFITM1;RNASEL;SHC1;IL34;HLA-B;INPPL1;IRAK4;GFRA2;YWHAZ;RASA4;KRAS;NUP98;STX3;UBE2V1;LTB;BIRC2
Recycling pathway of L1 Homo sapiens R-HSA-437239	2021-02-26	0.0724038	0.457724	0	0	4.81225	12.6346	AP2M1;DNM1
SHC-mediated cascade:FGFR2 Homo sapiens R-HSA-5654699	2021-02-26	0.0724038	0.457724	0	0	4.81225	12.6346	SHC1;KRAS
ZBP1(DAI) mediated induction of type I IFNs Homo sapiens R-HSA-1606322	2021-02-26	0.0724038	0.457724	0	0	4.81225	12.6346	TBK1;HMGB1
Formation of the beta-catenin:TCF transactivating complex Homo sapiens R-HSA-201722	1958-03-01	0.0769321	0.457724	0	0	3.15414	8.08985	TERT;ASH2L;HIST2H2AC
Infectious disease Homo sapiens R-HSA-5663205	10/348	0.0770243	0.457724	0	0	1.72168	4.41376	CCNK;TSG101;GTF2B;POLR2F;RPL26;NUP98;RAC1;GTF2E1;RPL3L;AP2M1
Asparagine N-linked glycosylation Homo sapiens R-HSA-446203	8/259	0.0777692	0.457724	0	0	1.85195	4.72989	EDEM3;NSF;FUCA1;RFT1;TMED3;DERL2;DOLK;NAPG
Telomere Maintenance Homo sapiens R-HSA-157579	1959-03-01	0.0800734	0.457724	0	0	3.09766	7.82101	POLD4;TERT;HIST2H2AC
The role of Nef in HIV-1 replication and disease pathogenesis Homo sapiens R-HSA-164952	2021-02-28	0.0823794	0.457724	0	0	4.44163	11.0882	RAC1;AP2M1
RNA Polymerase III Transcription Initiation From Type 3 Promoter Homo sapiens R-HSA-76071	2021-02-28	0.0823794	0.457724	0	0	4.44163	11.0882	ZNF143;POLR2F
Extension of Telomeres Homo sapiens R-HSA-180786	2021-02-28	0.0823794	0.457724	0	0	4.44163	11.0882	POLD4;TERT
L1CAM interactions Homo sapiens R-HSA-373760	1996-04-01	0.0825009	0.457724	0	0	2.51685	6.27941	RAC1;SCN3A;AP2M1;DNM1
Abacavir metabolism Homo sapiens R-HSA-2161541	2021-01-05	0.0826332	0.457724	0	0	14.4091	35.9268	GUK1
Sodium-coupled phosphate cotransporters Homo sapiens R-HSA-427652	2021-01-05	0.0826332	0.457724	0	0	14.4091	35.9268	SLC34A3
Electric Transmission Across Gap Junctions Homo sapiens R-HSA-112303	2021-01-05	0.0826332	0.457724	0	0	14.4091	35.9268	PANX2
Transmission across Electrical Synapses Homo sapiens R-HSA-112307	2021-01-05	0.0826332	0.457724	0	0	14.4091	35.9268	PANX2
SMAC binds to IAPs Homo sapiens R-HSA-111463	2021-01-05	0.0826332	0.457724	0	0	14.4091	35.9268	DIABLO
SMAC-mediated dissociation of IAP:caspase complexes Homo sapiens R-HSA-111464	2021-01-05	0.0826332	0.457724	0	0	14.4091	35.9268	DIABLO
SMAC-mediated apoptotic response Homo sapiens R-HSA-111469	2021-01-05	0.0826332	0.457724	0	0	14.4091	35.9268	DIABLO
Alpha-oxidation of phytanate Homo sapiens R-HSA-389599	2021-01-05	0.0826332	0.457724	0	0	14.4091	35.9268	ALDH3A2
The fatty acid cycling model Homo sapiens R-HSA-167826	2021-01-05	0.0826332	0.457724	0	0	14.4091	35.9268	UCP3
The proton buffering model Homo sapiens R-HSA-167827	2021-01-05	0.0826332	0.457724	0	0	14.4091	35.9268	UCP3
Mitochondrial Uncoupling Proteins Homo sapiens R-HSA-166187	2021-01-05	0.0826332	0.457724	0	0	14.4091	35.9268	UCP3
Trafficking of myristoylated proteins to the cilium Homo sapiens R-HSA-5624138	2021-01-05	0.0826332	0.457724	0	0	14.4091	35.9268	NPHP3
Signaling by MST1 Homo sapiens R-HSA-8852405	2021-01-05	0.0826332	0.457724	0	0	14.4091	35.9268	MST1
Activation of RAS in B cells Homo sapiens R-HSA-1169092	2021-01-05	0.0826332	0.457724	0	0	14.4091	35.9268	KRAS
RHO GTPases activate PKNs Homo sapiens R-HSA-5625740	1960-03-01	0.0832695	0.457724	0	0	3.04316	7.5643	RAC1;YWHAZ;HIST2H2AC
MyD88-independent TLR3/TLR4 cascade Homo sapiens R-HSA-166166	1997-04-01	0.0849516	0.457724	0	0	2.48966	6.13869	TBK1;UBE2V1;HMGB1;BIRC2
Toll Like Receptor 3 (TLR3) Cascade Homo sapiens R-HSA-168164	1997-04-01	0.0849516	0.457724	0	0	2.48966	6.13869	TBK1;UBE2V1;HMGB1;BIRC2
TRIF-mediated TLR3/TLR4 signaling Homo sapiens R-HSA-937061	1997-04-01	0.0849516	0.457724	0	0	2.48966	6.13869	TBK1;UBE2V1;HMGB1;BIRC2
Termination of translesion DNA synthesis Homo sapiens R-HSA-5656169	1930-02-01	0.0927459	0.496019	0	0	4.12395	9.80631	POLD4;USP10
Factors involved in megakaryocyte development and platelet production Homo sapiens R-HSA-983231	5/141	0.0948135	0.496433	0	0	2.12973	5.01732	AKAP10;CAPZA1;KIF1C;HMG20B;RAC1
NOD1/2 Signaling Pathway Homo sapiens R-HSA-168638	1931-02-01	0.0980638	0.496433	0	0	3.98154	9.24569	UBE2V1;BIRC2
Synthesis of Dolichyl-phosphate Homo sapiens R-HSA-446199	2021-01-06	0.098324	0.496433	0	0	11.5267	26.736	DOLK
IRF3 mediated activation of type 1 IFN Homo sapiens R-HSA-1606341	2021-01-06	0.098324	0.496433	0	0	11.5267	26.736	TBK1
Telomere Extension By Telomerase Homo sapiens R-HSA-171319	2021-01-06	0.098324	0.496433	0	0	11.5267	26.736	TERT
Synthesis of wybutosine at G37 of tRNA(Phe) Homo sapiens R-HSA-6782861	2021-01-06	0.098324	0.496433	0	0	11.5267	26.736	LCMT2
TNFR1-mediated ceramide production Homo sapiens R-HSA-5626978	2021-01-06	0.098324	0.496433	0	0	11.5267	26.736	NSMAF
Phosphorylation of Emi1 Homo sapiens R-HSA-176417	2021-01-06	0.098324	0.496433	0	0	11.5267	26.736	FBXO5
mRNA Splicing Homo sapiens R-HSA-72172	5/144	0.101386	0.501749	0	0	2.08345	4.76864	DDX23;CD2BP2;POLR2F;SNRNP35;RBM5
Assembly of the primary cilium Homo sapiens R-HSA-5617833	6/187	0.102401	0.501749	0	0	1.92157	4.37897	NPHP3;EXOC3;MARK4;PKD1;CKAP5;SSTR3
HIV elongation arrest and recovery Homo sapiens R-HSA-167287	1932-02-01	0.103465	0.501749	0	0	3.84863	8.73068	CCNK;POLR2F
Pausing and recovery of HIV elongation Homo sapiens R-HSA-167290	1932-02-01	0.103465	0.501749	0	0	3.84863	8.73068	CCNK;POLR2F
Elongation arrest and recovery Homo sapiens R-HSA-112387	1932-02-01	0.103465	0.501749	0	0	3.84863	8.73068	CCNK;POLR2F
Cytosolic sensors of pathogen-associated DNA Homo sapiens R-HSA-1834949	1966-03-01	0.103547	0.501749	0	0	2.75249	6.24192	TBK1;POLR2F;HMGB1
Signaling by PTK6 Homo sapiens R-HSA-8848021	1967-03-01	0.1071	0.515509	0	0	2.70935	6.05266	RASA4;KRAS;RAC1
Sphingolipid de novo biosynthesis Homo sapiens R-HSA-1660661	1933-02-01	0.108946	0.516179	0	0	3.72429	8.25638	ALDH3A2;PRKD1
Metabolism of vitamins and cofactors Homo sapiens R-HSA-196854	5/148	0.110493	0.516179	0	0	2.02476	4.46014	NFS1;MOCS3;CARKD;COASY;CD320
Interferon alpha/beta signaling Homo sapiens R-HSA-909733	1968-03-01	0.110701	0.516179	0	0	2.66753	5.87103	IFITM1;RNASEL;HLA-B
Post-translational protein modification Homo sapiens R-HSA-597592	13/521	0.112941	0.516179	0	0	1.48954	3.24853	EDEM3;NSF;PIAS3;FUCA1;DERL2;DOLK;NAPG;PIGB;ADAMTSL5;RFT1;TMED3;NUP98;ADAMTS7
Nef Mediated CD8 Down-regulation Homo sapiens R-HSA-182218	2021-01-07	0.113747	0.516179	0	0	9.60508	20.8793	AP2M1
Apoptotic factor-mediated response Homo sapiens R-HSA-111471	2021-01-07	0.113747	0.516179	0	0	9.60508	20.8793	DIABLO
Acyl chain remodeling of DAG and TAG Homo sapiens R-HSA-1482883	2021-01-07	0.113747	0.516179	0	0	9.60508	20.8793	PNPLA2
Synthesis of Ketone Bodies Homo sapiens R-HSA-77111	2021-01-07	0.113747	0.516179	0	0	9.60508	20.8793	HMGCL
Ubiquinol biosynthesis Homo sapiens R-HSA-2142789	2021-01-07	0.113747	0.516179	0	0	9.60508	20.8793	COQ5
Processing of Capped Intron-Containing Pre-mRNA Homo sapiens R-HSA-72203	6/193	0.114389	0.516179	0	0	1.85934	4.03133	DDX23;CD2BP2;POLR2F;NUP98;SNRNP35;RBM5
Transcriptional regulation by small RNAs Homo sapiens R-HSA-5578749	1972-03-01	0.125553	0.550717	0	0	2.51238	5.21324	POLR2F;NUP98;HIST2H2AC
RNA Polymerase III Transcription Initiation Homo sapiens R-HSA-76046	1936-02-01	0.125823	0.550717	0	0	3.39516	7.03776	ZNF143;POLR2F
Regulation of cytoskeletal remodeling and cell spreading by IPP complex components Homo sapiens R-HSA-446388	2021-01-08	0.128907	0.550717	0	0	8.23251	16.8656	LIMS1
Sema4D mediated inhibition of cell attachment and migration Homo sapiens R-HSA-416550	2021-01-08	0.128907	0.550717	0	0	8.23251	16.8656	RAC1
Nef and signal transduction Homo sapiens R-HSA-164944	2021-01-08	0.128907	0.550717	0	0	8.23251	16.8656	RAC1
Coenzyme A biosynthesis Homo sapiens R-HSA-196783	2021-01-08	0.128907	0.550717	0	0	8.23251	16.8656	COASY
Nicotinamide salvaging Homo sapiens R-HSA-197264	2021-01-08	0.128907	0.550717	0	0	8.23251	16.8656	CARKD
Recycling of eIF2:GDP Homo sapiens R-HSA-72731	2021-01-08	0.128907	0.550717	0	0	8.23251	16.8656	EIF2B5
Ketone body metabolism Homo sapiens R-HSA-74182	2021-01-08	0.128907	0.550717	0	0	8.23251	16.8656	HMGCL
Defective B3GALTL causes Peters-plus syndrome (PpS) Homo sapiens R-HSA-5083635	1937-02-01	0.131579	0.552928	0	0	3.29798	6.68879	ADAMTSL5;ADAMTS7
Translesion synthesis by Y family DNA polymerases bypasses lesions on DNA template Homo sapiens R-HSA-110313	1937-02-01	0.131579	0.552928	0	0	3.29798	6.68879	POLD4;USP10
RHO GTPases Activate Formins Homo sapiens R-HSA-5663220	4/114	0.131722	0.552928	0	0	2.10307	4.26304	KNTC1;NUP98;RAC1;CKAP5
Signaling by Interleukins Homo sapiens R-HSA-449147	10/392	0.136769	0.558687	0	0	1.5199	3.02379	SHC1;RASA4;IL34;INPPL1;KRAS;STX3;UBE2V1;IRAK4;GFRA2;YWHAZ
O-glycosylation of TSR domain-containing proteins Homo sapiens R-HSA-5173214	1938-02-01	0.137395	0.558687	0	0	3.20621	6.36399	ADAMTSL5;ADAMTS7
Beta defensins Homo sapiens R-HSA-1461957	1938-02-01	0.137395	0.558687	0	0	3.20621	6.36399	TLR1;TLR2
Inactivation of Cdc42 and Rac Homo sapiens R-HSA-428543	2021-01-09	0.143809	0.558687	0	0	7.20308	13.9687	RAC1
Alpha-defensins Homo sapiens R-HSA-1462054	2021-01-09	0.143809	0.558687	0	0	7.20308	13.9687	PRSS2
Nef Mediated CD4 Down-regulation Homo sapiens R-HSA-167590	2021-01-09	0.143809	0.558687	0	0	7.20308	13.9687	AP2M1
Mitochondrial iron-sulfur cluster biogenesis Homo sapiens R-HSA-1362409	2021-01-09	0.143809	0.558687	0	0	7.20308	13.9687	NFS1
Pentose phosphate pathway (hexose monophosphate shunt) Homo sapiens R-HSA-71336	2021-01-09	0.143809	0.558687	0	0	7.20308	13.9687	PGLS
EGFR Transactivation by Gastrin Homo sapiens R-HSA-2179392	2021-01-09	0.143809	0.558687	0	0	7.20308	13.9687	KRAS
RHO GTPase Effectors Homo sapiens R-HSA-195258	7/255	0.14847	0.558687	0	0	1.63541	3.11934	KNTC1;NUP98;RAC1;IQGAP3;CKAP5;YWHAZ;HIST2H2AC
COPI-mediated anterograde transport Homo sapiens R-HSA-6807878	1978-03-01	0.149066	0.558687	0	0	2.31068	4.39806	NSF;TMED3;NAPG
RNA Polymerase III Abortive And Retractive Initiation Homo sapiens R-HSA-749476	1941-02-01	0.155161	0.558687	0	0	2.95913	5.51372	ZNF143;POLR2F
RNA Polymerase III Transcription Homo sapiens R-HSA-74158	1941-02-01	0.155161	0.558687	0	0	2.95913	5.51372	ZNF143;POLR2F
TNF signaling Homo sapiens R-HSA-75893	1941-02-01	0.155161	0.558687	0	0	2.95913	5.51372	BIRC2;NSMAF
GP1b-IX-V activation signalling Homo sapiens R-HSA-430116	2021-01-10	0.158457	0.558687	0	0	6.40241	11.795	YWHAZ
Abacavir transport and metabolism Homo sapiens R-HSA-2161522	2021-01-10	0.158457	0.558687	0	0	6.40241	11.795	GUK1
Dectin-2 family Homo sapiens R-HSA-5621480	2021-01-10	0.158457	0.558687	0	0	6.40241	11.795	PLCG2
Activation of Ca-permeable Kainate Receptor Homo sapiens R-HSA-451308	2021-01-10	0.158457	0.558687	0	0	6.40241	11.795	GRIK5
Ionotropic activity of Kainate Receptors Homo sapiens R-HSA-451306	2021-01-10	0.158457	0.558687	0	0	6.40241	11.795	GRIK5
eNOS activation Homo sapiens R-HSA-203615	2021-01-10	0.158457	0.558687	0	0	6.40241	11.795	CYGB
Reactions specific to the complex N-glycan synthesis pathway Homo sapiens R-HSA-975578	2021-01-10	0.158457	0.558687	0	0	6.40241	11.795	FUCA1
Synthesis of pyrophosphates in the cytosol Homo sapiens R-HSA-1855167	2021-01-10	0.158457	0.558687	0	0	6.40241	11.795	IP6K1
Removal of the Flap Intermediate from the C-strand Homo sapiens R-HSA-174437	2021-01-10	0.158457	0.558687	0	0	6.40241	11.795	POLD4
Signal attenuation Homo sapiens R-HSA-74749	2021-01-10	0.158457	0.558687	0	0	6.40241	11.795	SHC1
Signaling by FGFR3 fusions in cancer Homo sapiens R-HSA-8853334	2021-01-10	0.158457	0.558687	0	0	6.40241	11.795	KRAS
IRAK1 recruits IKK complex Homo sapiens R-HSA-937039	2021-01-10	0.158457	0.558687	0	0	6.40241	11.795	UBE2V1
IRAK1 recruits IKK complex upon TLR7/8 or 9 stimulation Homo sapiens R-HSA-975144	2021-01-10	0.158457	0.558687	0	0	6.40241	11.795	UBE2V1
C-type lectin receptors (CLRs) Homo sapiens R-HSA-5621481	4/123	0.15997	0.558687	0	0	1.94312	3.56129	CD209;PLCG2;KRAS;UBE2V1
Intrinsic Pathway for Apoptosis Homo sapiens R-HSA-109606	1942-02-01	0.161177	0.558687	0	0	2.885	5.26585	DIABLO;YWHAZ
Viral Messenger RNA Synthesis Homo sapiens R-HSA-168325	1942-02-01	0.161177	0.558687	0	0	2.885	5.26585	POLR2F;NUP98
tRNA Aminoacylation Homo sapiens R-HSA-379724	1942-02-01	0.161177	0.558687	0	0	2.885	5.26585	LARS2;VARS
RNA Polymerase II Transcription Homo sapiens R-HSA-73857	4/124	0.163237	0.558687	0	0	1.92682	3.49247	CCNK;GTF2B;POLR2F;GTF2E1
Toll Like Receptor 10 (TLR10) Cascade Homo sapiens R-HSA-168142	1982-03-01	0.165466	0.558687	0	0	2.19323	3.9456	HMGB1;IRAK4;UBE2V1
Toll Like Receptor 5 (TLR5) Cascade Homo sapiens R-HSA-168176	1982-03-01	0.165466	0.558687	0	0	2.19323	3.9456	HMGB1;IRAK4;UBE2V1
MyD88 cascade initiated on plasma membrane Homo sapiens R-HSA-975871	1982-03-01	0.165466	0.558687	0	0	2.19323	3.9456	HMGB1;IRAK4;UBE2V1
Signaling by FGFR2 in disease Homo sapiens R-HSA-5655253	1943-02-01	0.167236	0.558687	0	0	2.81449	5.0333	POLR2F;KRAS
TRAF6 mediated induction of NFkB and MAP kinases upon TLR7/8 or 9 activation Homo sapiens R-HSA-975138	1983-03-01	0.169647	0.558687	0	0	2.16571	3.84204	HMGB1;IRAK4;UBE2V1
RHO GTPases activate KTN1 Homo sapiens R-HSA-5625970	2021-01-11	0.172854	0.558687	0	0	5.76188	10.1139	RAC1
Defects in cobalamin (B12) metabolism Homo sapiens R-HSA-3296469	2021-01-11	0.172854	0.558687	0	0	5.76188	10.1139	CD320
CYP2E1 reactions Homo sapiens R-HSA-211999	2021-01-11	0.172854	0.558687	0	0	5.76188	10.1139	CYP2S1
Processive synthesis on the C-strand of the telomere Homo sapiens R-HSA-174414	2021-01-11	0.172854	0.558687	0	0	5.76188	10.1139	POLD4
Membrane binding and targetting of GAG proteins Homo sapiens R-HSA-174490	2021-01-11	0.172854	0.558687	0	0	5.76188	10.1139	TSG101
Synthesis And Processing Of GAG, GAGPOL Polyproteins Homo sapiens R-HSA-174495	2021-01-11	0.172854	0.558687	0	0	5.76188	10.1139	TSG101
Signaling by FGFR4 in disease Homo sapiens R-HSA-5655291	2021-01-11	0.172854	0.558687	0	0	5.76188	10.1139	KRAS
DSCAM interactions Homo sapiens R-HSA-376172	2021-01-11	0.172854	0.558687	0	0	5.76188	10.1139	RAC1
Phase 0 - rapid depolarisation Homo sapiens R-HSA-5576892	1944-02-01	0.173332	0.558687	0	0	2.74734	4.81483	CACNA1C;SCN3A
Intra-Golgi traffic Homo sapiens R-HSA-6811438	1944-02-01	0.173332	0.558687	0	0	2.74734	4.81483	NSF;NAPG
SUMOylation of DNA replication proteins Homo sapiens R-HSA-4615885	1944-02-01	0.173332	0.558687	0	0	2.74734	4.81483	PIAS3;NUP98
Formation of HIV elongation complex in the absence of HIV Tat Homo sapiens R-HSA-167152	1944-02-01	0.173332	0.558687	0	0	2.74734	4.81483	CCNK;POLR2F
RNA Polymerase II Transcription Elongation Homo sapiens R-HSA-75955	1944-02-01	0.173332	0.558687	0	0	2.74734	4.81483	CCNK;POLR2F
Formation of RNA Pol II elongation complex Homo sapiens R-HSA-112382	1944-02-01	0.173332	0.558687	0	0	2.74734	4.81483	CCNK;POLR2F
Interleukin-1 signaling Homo sapiens R-HSA-446652	1944-02-01	0.173332	0.558687	0	0	2.74734	4.81483	IRAK4;UBE2V1
Axon guidance Homo sapiens R-HSA-422475	12/515	0.174178	0.558917	0	0	1.38478	2.42016	ROBO3;COL4A2;SHC1;RASA4;KRAS;RAC1;CACNA1C;SCN3A;GFRA2;AP2M1;DNM1;PAK4
Influenza Viral RNA Transcription and Replication Homo sapiens R-HSA-168273	4/128	0.176544	0.563363	0	0	1.86429	3.23302	POLR2F;NUP98;RPL26;RPL3L
MyD88 dependent cascade initiated on endosome Homo sapiens R-HSA-975155	1985-03-01	0.178099	0.563363	0	0	2.11267	3.64524	HMGB1;IRAK4;UBE2V1
Toll Like Receptor 7/8 (TLR7/8) Cascade Homo sapiens R-HSA-168181	1985-03-01	0.178099	0.563363	0	0	2.11267	3.64524	HMGB1;IRAK4;UBE2V1
RMTs methylate histone arginines Homo sapiens R-HSA-3214858	1945-02-01	0.179465	0.563363	0	0	2.68331	4.60933	PRMT6;HIST2H2AC
Signaling by ERBB2 Homo sapiens R-HSA-1227986	1945-02-01	0.179465	0.563363	0	0	2.68331	4.60933	SHC1;KRAS
Chromosome Maintenance Homo sapiens R-HSA-73886	1986-03-01	0.182368	0.564931	0	0	2.08711	3.5517	POLD4;TERT;HIST2H2AC
DNA Damage Bypass Homo sapiens R-HSA-73893	1946-02-01	0.185629	0.564931	0	0	2.62219	4.41578	POLD4;USP10
Endosomal/Vacuolar pathway Homo sapiens R-HSA-1236977	2021-01-12	0.187006	0.564931	0	0	5.2378	8.78177	HLA-B
TP53 Regulates Transcription of Death Receptors and Ligands Homo sapiens R-HSA-6803211	2021-01-12	0.187006	0.564931	0	0	5.2378	8.78177	TNFRSF10B
Chk1/Chk2(Cds1) mediated inactivation of Cyclin B:Cdk1 complex Homo sapiens R-HSA-75035	2021-01-12	0.187006	0.564931	0	0	5.2378	8.78177	YWHAZ
The NLRP3 inflammasome Homo sapiens R-HSA-844456	2021-01-12	0.187006	0.564931	0	0	5.2378	8.78177	MEFV
CD28 dependent Vav1 pathway Homo sapiens R-HSA-389359	2021-01-12	0.187006	0.564931	0	0	5.2378	8.78177	RAC1
Vitamin B5 (pantothenate) metabolism Homo sapiens R-HSA-199220	2021-01-12	0.187006	0.564931	0	0	5.2378	8.78177	COASY
Miscellaneous substrates Homo sapiens R-HSA-211958	2021-01-12	0.187006	0.564931	0	0	5.2378	8.78177	CYP2S1
Toll Like Receptor 9 (TLR9) Cascade Homo sapiens R-HSA-168138	1988-03-01	0.190986	0.574549	0	0	2.03779	3.37368	HMGB1;IRAK4;UBE2V1
Antigen activates B Cell Receptor (BCR) leading to generation of second messengers Homo sapiens R-HSA-983695	1947-02-01	0.191824	0.574676	0	0	2.56379	4.23327	SHC1;PLCG2
mRNA Splicing - Major Pathway Homo sapiens R-HSA-72163	4/134	0.197157	0.580247	0	0	1.7777	2.88654	DDX23;CD2BP2;POLR2F;RBM5
Dissolution of Fibrin Clot Homo sapiens R-HSA-75205	2021-01-13	0.200917	0.580247	0	0	4.80108	7.70508	ANXA2
Depolarization of the Presynaptic Terminal Triggers the Opening of Calcium Channels Homo sapiens R-HSA-112308	2021-01-13	0.200917	0.580247	0	0	4.80108	7.70508	CACNA1B
WNT5A-dependent internalization of FZD2, FZD5 and ROR2 Homo sapiens R-HSA-5140745	2021-01-13	0.200917	0.580247	0	0	4.80108	7.70508	AP2M1
RHO GTPases Activate NADPH Oxidases Homo sapiens R-HSA-5668599	2021-01-13	0.200917	0.580247	0	0	4.80108	7.70508	RAC1
IRF3-mediated induction of type I IFN Homo sapiens R-HSA-3270619	2021-01-13	0.200917	0.580247	0	0	4.80108	7.70508	TBK1
Assembly Of The HIV Virion Homo sapiens R-HSA-175474	2021-01-13	0.200917	0.580247	0	0	4.80108	7.70508	TSG101
p38MAPK events Homo sapiens R-HSA-171007	2021-01-13	0.200917	0.580247	0	0	4.80108	7.70508	KRAS
DEx/H-box helicases activate type I IFN and inflammatory cytokines production Homo sapiens R-HSA-3134963	2021-01-13	0.200917	0.580247	0	0	4.80108	7.70508	HMGB1
Influenza Life Cycle Homo sapiens R-HSA-168255	4/136	0.204187	0.587343	0	0	1.75058	2.78118	POLR2F;NUP98;RPL26;RPL3L
DCC mediated attractive signaling Homo sapiens R-HSA-418885	2021-01-14	0.21459	0.591351	0	0	4.43154	6.82025	RAC1
SEMA3A-Plexin repulsion signaling by inhibiting Integrin adhesion Homo sapiens R-HSA-399955	2021-01-14	0.21459	0.591351	0	0	4.43154	6.82025	RAC1
SUMOylation of transcription factors Homo sapiens R-HSA-3232118	2021-01-14	0.21459	0.591351	0	0	4.43154	6.82025	PIAS3
Nicotinate metabolism Homo sapiens R-HSA-196807	2021-01-14	0.21459	0.591351	0	0	4.43154	6.82025	CARKD
Polymerase switching on the C-strand of the telomere Homo sapiens R-HSA-174411	2021-01-14	0.21459	0.591351	0	0	4.43154	6.82025	POLD4
Polymerase switching Homo sapiens R-HSA-69091	2021-01-14	0.21459	0.591351	0	0	4.43154	6.82025	POLD4
Leading Strand Synthesis Homo sapiens R-HSA-69109	2021-01-14	0.21459	0.591351	0	0	4.43154	6.82025	POLD4
Mismatch repair (MMR) directed by MSH2:MSH3 (MutSbeta) Homo sapiens R-HSA-5358606	2021-01-14	0.21459	0.591351	0	0	4.43154	6.82025	POLD4
Mismatch repair (MMR) directed by MSH2:MSH6 (MutSalpha) Homo sapiens R-HSA-5358565	2021-01-14	0.21459	0.591351	0	0	4.43154	6.82025	POLD4
Removal of the Flap Intermediate Homo sapiens R-HSA-69166	2021-01-14	0.21459	0.591351	0	0	4.43154	6.82025	POLD4
TRAF3-dependent IRF activation pathway Homo sapiens R-HSA-918233	2021-01-14	0.21459	0.591351	0	0	4.43154	6.82025	TBK1
EPH-Ephrin signaling Homo sapiens R-HSA-2682334	1995-03-01	0.221893	0.60915	0	0	1.88207	2.83357	RAC1;AP2M1;DNM1
Neurotransmitter Receptor Binding And Downstream Transmission In The Postsynaptic Cell Homo sapiens R-HSA-112314	4/142	0.225697	0.609768	0	0	1.67396	2.49179	NSF;GRIK5;MYO6;AP2M1
Elevation of cytosolic Ca2+ levels Homo sapiens R-HSA-139853	2021-01-15	0.22803	0.609768	0	0	4.11479	6.08281	P2RX2
WNT5A-dependent internalization of FZD4 Homo sapiens R-HSA-5099900	2021-01-15	0.22803	0.609768	0	0	4.11479	6.08281	AP2M1
Activation of BAD and translocation to mitochondria Homo sapiens R-HSA-111447	2021-01-15	0.22803	0.609768	0	0	4.11479	6.08281	YWHAZ
Regulation of innate immune responses to cytosolic DNA Homo sapiens R-HSA-3134975	2021-01-15	0.22803	0.609768	0	0	4.11479	6.08281	TBK1
Mismatch Repair Homo sapiens R-HSA-5358508	2021-01-15	0.22803	0.609768	0	0	4.11479	6.08281	POLD4
Processive synthesis on the lagging strand Homo sapiens R-HSA-69183	2021-01-15	0.22803	0.609768	0	0	4.11479	6.08281	POLD4
Adaptive Immune System Homo sapiens R-HSA-1280218	16/762	0.234069	0.619842	0	0	1.24423	1.8068	IFITM1;RNF34;SHC1;HLA-B;TAP1;YWHAZ;DNM1;FCGR3A;UBE2Q1;TRIM39;PLCG2;KRAS;RAC1;UBE2V1;CTSE;AP2M1
Golgi Associated Vesicle Biogenesis Homo sapiens R-HSA-432722	1954-02-01	0.235789	0.619842	0	0	2.21787	3.20442	CLINT1;AP4B1
Meiotic recombination Homo sapiens R-HSA-912446	1954-02-01	0.235789	0.619842	0	0	2.21787	3.20442	TOP3A;HIST2H2AC
Resolution of Sister Chromatid Cohesion Homo sapiens R-HSA-2500257	1999-03-01	0.23998	0.619842	0	0	1.80328	2.57365	KNTC1;NUP98;CKAP5
Cell-extracellular matrix interactions Homo sapiens R-HSA-446353	2021-01-16	0.24124	0.619842	0	0	3.84027	5.46072	LIMS1
Rap1 signalling Homo sapiens R-HSA-392517	2021-01-16	0.24124	0.619842	0	0	3.84027	5.46072	YWHAZ
Sema3A PAK dependent Axon repulsion Homo sapiens R-HSA-399954	2021-01-16	0.24124	0.619842	0	0	3.84027	5.46072	RAC1
RHO GTPases activate CIT Homo sapiens R-HSA-5625900	2021-01-16	0.24124	0.619842	0	0	3.84027	5.46072	RAC1
Synthesis of glycosylphosphatidylinositol (GPI) Homo sapiens R-HSA-162710	2021-01-16	0.24124	0.619842	0	0	3.84027	5.46072	PIGB
STING mediated induction of host immune responses Homo sapiens R-HSA-1834941	2021-01-16	0.24124	0.619842	0	0	3.84027	5.46072	TBK1
GRB2 events in ERBB2 signaling Homo sapiens R-HSA-1963640	2021-01-16	0.24124	0.619842	0	0	3.84027	5.46072	KRAS
Influenza Infection Homo sapiens R-HSA-168254	4/147	0.244044	0.624823	0	0	1.61501	2.27782	POLR2F;NUP98;RPL26;RPL3L
Muscle contraction Homo sapiens R-HSA-397014	5/196	0.245213	0.625597	0	0	1.51219	2.12557	ANXA2;TCAP;ATP1A3;CACNA1C;SCN3A
Transcriptional Regulation by TP53 Homo sapiens R-HSA-3700989	8/348	0.246736	0.627266	0	0	1.3609	1.90449	CCNK;RRAGA;BTG2;RNF34;TOP3A;TNFRSF10B;POLR2F;YWHAZ
Gene Silencing by RNA Homo sapiens R-HSA-211000	3/101	0.249115	0.631091	0	0	1.7663	2.45487	POLR2F;NUP98;HIST2H2AC
KSRP (KHSRP) binds and destabilizes mRNA Homo sapiens R-HSA-450604	2021-01-17	0.254225	0.632237	0	0	3.60007	4.93042	YWHAZ
Inflammasomes Homo sapiens R-HSA-622312	2021-01-17	0.254225	0.632237	0	0	3.60007	4.93042	MEFV
Formation of Senescence-Associated Heterochromatin Foci (SAHF) Homo sapiens R-HSA-2559584	2021-01-17	0.254225	0.632237	0	0	3.60007	4.93042	HIST1H1E
G1/S-Specific Transcription Homo sapiens R-HSA-69205	2021-01-17	0.254225	0.632237	0	0	3.60007	4.93042	FBXO5
tRNA processing in the nucleus Homo sapiens R-HSA-6784531	1957-02-01	0.254821	0.632237	0	0	2.09658	2.86642	NUP98;RPP38
RNA Polymerase I Chain Elongation Homo sapiens R-HSA-73777	1957-02-01	0.254821	0.632237	0	0	2.09658	2.86642	POLR2F;HIST2H2AC
Neuronal System Homo sapiens R-HSA-112316	7/301	0.257509	0.634334	0	0	1.37626	1.86718	NSF;PANX2;GRIK5;MYO6;CACNA1B;AP2M1;HCN2
MHC class II antigen presentation Homo sapiens R-HSA-2132295	3/103	0.258302	0.634334	0	0	1.7308	2.34285	CTSE;AP2M1;DNM1
tRNA processing Homo sapiens R-HSA-72306	3/103	0.258302	0.634334	0	0	1.7308	2.34285	LCMT2;NUP98;RPP38
B-WICH complex positively regulates rRNA expression Homo sapiens R-HSA-5250924	1958-02-01	0.261175	0.639214	0	0	2.05903	2.76439	POLR2F;HIST2H2AC
Defects in vitamin and cofactor metabolism Homo sapiens R-HSA-3296482	2021-01-18	0.266989	0.646007	0	0	3.38813	4.47419	CD320
RNA Polymerase III Chain Elongation Homo sapiens R-HSA-73780	2021-01-18	0.266989	0.646007	0	0	3.38813	4.47419	POLR2F
Activation of IRF3/IRF7 mediated by TBK1/IKK epsilon Homo sapiens R-HSA-936964	2021-01-18	0.266989	0.646007	0	0	3.38813	4.47419	TBK1
DNA Damage/Telomere Stress Induced Senescence Homo sapiens R-HSA-2559586	1959-02-01	0.267529	0.646007	0	0	2.02281	2.66713	HIST1H1E;HIST2H2AC
Developmental Biology Homo sapiens R-HSA-1266738	16/786	0.272316	0.65478	0	0	1.20392	1.56605	ROBO3;SHC1;ASH2L;CACNA1C;GFRA2;DNM1;HIST2H2AC;COL4A2;RASA4;POLR2F;KRAS;RAC1;ZNF335;SCN3A;AP2M1;PAK4
Role of phospholipids in phagocytosis Homo sapiens R-HSA-2029485	1960-02-01	0.273883	0.65478	0	0	1.98783	2.57435	FCGR3A;PLCG2
HDACs deacetylate histones Homo sapiens R-HSA-3214815	1960-02-01	0.273883	0.65478	0	0	1.98783	2.57435	HMG20B;HIST2H2AC
Mitotic Prometaphase Homo sapiens R-HSA-68877	3/107	0.276803	0.654787	0	0	1.66389	2.13718	KNTC1;NUP98;CKAP5
Na+/Cl- dependent neurotransmitter transporters Homo sapiens R-HSA-442660	2021-01-19	0.279535	0.654787	0	0	3.19974	4.07848	SLC6A2
Ephrin signaling Homo sapiens R-HSA-3928664	2021-01-19	0.279535	0.654787	0	0	3.19974	4.07848	RAC1
Scavenging by Class A Receptors Homo sapiens R-HSA-3000480	2021-01-19	0.279535	0.654787	0	0	3.19974	4.07848	COL4A2
Signaling by FGFR2 IIIa TM Homo sapiens R-HSA-8851708	2021-01-19	0.279535	0.654787	0	0	3.19974	4.07848	POLR2F
PCNA-Dependent Long Patch Base Excision Repair Homo sapiens R-HSA-5651801	2021-01-19	0.279535	0.654787	0	0	3.19974	4.07848	POLD4
TP53 Regulates Transcription of DNA Repair Genes Homo sapiens R-HSA-6796648	1961-02-01	0.280234	0.654787	0	0	1.95404	2.48579	CCNK;POLR2F
Nucleotide Excision Repair Homo sapiens R-HSA-5696398	3/108	0.28145	0.655507	0	0	1.64796	2.08928	PIAS3;POLD4;POLR2F
FCERI mediated Ca+2 mobilization Homo sapiens R-HSA-2871809	1962-02-01	0.286581	0.658847	0	0	1.92137	2.4012	SHC1;PLCG2
Diseases associated with O-glycosylation of proteins Homo sapiens R-HSA-3906995	1962-02-01	0.286581	0.658847	0	0	1.92137	2.4012	ADAMTSL5;ADAMTS7
Gap-filling DNA repair synthesis and ligation in TC-NER Homo sapiens R-HSA-6782210	1962-02-01	0.286581	0.658847	0	0	1.92137	2.4012	POLD4;POLR2F
Interleukin-3, 5 and GM-CSF signaling Homo sapiens R-HSA-512988	6/261	0.289355	0.658847	0	0	1.35875	1.68499	SHC1;RASA4;INPPL1;KRAS;GFRA2;YWHAZ
Chondroitin sulfate biosynthesis Homo sapiens R-HSA-2022870	2021-01-20	0.291866	0.658847	0	0	3.03118	3.73277	CHST11
eNOS activation and regulation Homo sapiens R-HSA-203765	2021-01-20	0.291866	0.658847	0	0	3.03118	3.73277	CYGB
Metabolism of nitric oxide Homo sapiens R-HSA-202131	2021-01-20	0.291866	0.658847	0	0	3.03118	3.73277	CYGB
Xenobiotics Homo sapiens R-HSA-211981	2021-01-20	0.291866	0.658847	0	0	3.03118	3.73277	CYP2S1
Lagging Strand Synthesis Homo sapiens R-HSA-69186	2021-01-20	0.291866	0.658847	0	0	3.03118	3.73277	POLD4
Dual incision in TC-NER Homo sapiens R-HSA-6782135	1963-02-01	0.292922	0.658847	0	0	1.88978	2.32036	POLD4;POLR2F
Signaling by FGFR in disease Homo sapiens R-HSA-1226099	1963-02-01	0.292922	0.658847	0	0	1.88978	2.32036	POLR2F;KRAS
Transmission across Chemical Synapses Homo sapiens R-HSA-112315	5/211	0.294034	0.659294	0	0	1.401	1.7149	NSF;GRIK5;MYO6;CACNA1B;AP2M1
HDR through Homologous Recombination (HRR) Homo sapiens R-HSA-5685942	1964-02-01	0.299256	0.65949	0	0	1.8592	2.24305	POLD4;TOP3A
Transport to the Golgi and subsequent modification Homo sapiens R-HSA-948021	4/162	0.300765	0.65949	0	0	1.46056	1.75476	NSF;FUCA1;TMED3;NAPG
RHO GTPases activate PAKs Homo sapiens R-HSA-5627123	2021-01-21	0.303988	0.65949	0	0	2.87947	3.42878	RAC1
Nef-mediates down modulation of cell surface receptors by recruiting them to clathrin adapters Homo sapiens R-HSA-164938	2021-01-21	0.303988	0.65949	0	0	2.87947	3.42878	AP2M1
TP53 regulates transcription of additional cell cycle genes whose exact role in the p53 pathway remain uncertain Homo sapiens R-HSA-6804115	2021-01-21	0.303988	0.65949	0	0	2.87947	3.42878	BTG2
Cobalamin (Cbl, vitamin B12) transport and metabolism Homo sapiens R-HSA-196741	2021-01-21	0.303988	0.65949	0	0	2.87947	3.42878	CD320
Synthesis of Leukotrienes (LT) and Eoxins (EX) Homo sapiens R-HSA-2142691	2021-01-21	0.303988	0.65949	0	0	2.87947	3.42878	DPEP3
Mitochondrial tRNA aminoacylation Homo sapiens R-HSA-379726	2021-01-21	0.303988	0.65949	0	0	2.87947	3.42878	LARS2
Signal transduction by L1 Homo sapiens R-HSA-445144	2021-01-21	0.303988	0.65949	0	0	2.87947	3.42878	RAC1
RIP-mediated NFkB activation via ZBP1 Homo sapiens R-HSA-1810476	2021-01-21	0.303988	0.65949	0	0	2.87947	3.42878	HMGB1
NCAM signaling for neurite out-growth Homo sapiens R-HSA-375165	6/266	0.304169	0.65949	0	0	1.33228	1.58564	COL4A2;SHC1;RASA4;KRAS;CACNA1C;GFRA2
ER-Phagosome pathway Homo sapiens R-HSA-1236974	1965-02-01	0.30558	0.660565	0	0	1.8296	2.16907	HLA-B;TAP1
Cap-dependent Translation Initiation Homo sapiens R-HSA-72737	3/114	0.309451	0.664951	0	0	1.5584	1.82793	EIF2B5;RPL26;RPL3L
Eukaryotic Translation Initiation Homo sapiens R-HSA-72613	3/114	0.309451	0.664951	0	0	1.5584	1.82793	EIF2B5;RPL26;RPL3L
mTORC1-mediated signalling Homo sapiens R-HSA-166208	2021-01-22	0.315902	0.66886	0	0	2.74221	3.15992	RRAGA
Resolution of AP sites via the multiple-nucleotide patch replacement pathway Homo sapiens R-HSA-110373	2021-01-22	0.315902	0.66886	0	0	2.74221	3.15992	POLD4
Telomere C-strand (Lagging Strand) Synthesis Homo sapiens R-HSA-174417	2021-01-22	0.315902	0.66886	0	0	2.74221	3.15992	POLD4
Signaling by FGFR3 point mutants in cancer Homo sapiens R-HSA-8853338	2021-01-22	0.315902	0.66886	0	0	2.74221	3.15992	KRAS
Signaling by FGFR3 in disease Homo sapiens R-HSA-5655332	2021-01-22	0.315902	0.66886	0	0	2.74221	3.15992	KRAS
Regulation of RAS by GAPs Homo sapiens R-HSA-5658442	1967-02-01	0.318195	0.671084	0	0	1.77312	2.03039	RASA4;KRAS
RNA Polymerase I, RNA Polymerase III, and Mitochondrial Transcription Homo sapiens R-HSA-504046	3/116	0.318811	0.671084	0	0	1.53066	1.74978	ZNF143;POLR2F;HIST2H2AC
COPII (Coat Protein 2) Mediated Vesicle Transport Homo sapiens R-HSA-204005	1968-02-01	0.324483	0.675819	0	0	1.74617	1.96535	NSF;NAPG
BBSome-mediated cargo-targeting to cilium Homo sapiens R-HSA-5620922	2021-01-23	0.327613	0.675819	0	0	2.61744	2.92086	SSTR3
Cholesterol biosynthesis Homo sapiens R-HSA-191273	2021-01-23	0.327613	0.675819	0	0	2.61744	2.92086	FDFT1
RNA Polymerase III Transcription Termination Homo sapiens R-HSA-73980	2021-01-23	0.327613	0.675819	0	0	2.61744	2.92086	POLR2F
MicroRNA (miRNA) biogenesis Homo sapiens R-HSA-203927	2021-01-23	0.327613	0.675819	0	0	2.61744	2.92086	POLR2F
Abortive elongation of HIV-1 transcript in the absence of Tat Homo sapiens R-HSA-167242	2021-01-23	0.327613	0.675819	0	0	2.61744	2.92086	POLR2F
Gap-filling DNA repair synthesis and ligation in GG-NER Homo sapiens R-HSA-5696397	2021-01-23	0.327613	0.675819	0	0	2.61744	2.92086	POLD4
trans-Golgi Network Vesicle Budding Homo sapiens R-HSA-199992	1970-02-01	0.337012	0.685847	0	0	1.69464	1.84315	CLINT1;AP4B1
Clathrin derived vesicle budding Homo sapiens R-HSA-421837	1970-02-01	0.337012	0.685847	0	0	1.69464	1.84315	CLINT1;AP4B1
Fcgamma receptor (FCGR) dependent phagocytosis Homo sapiens R-HSA-2029480	3/120	0.337538	0.685847	0	0	1.47803	1.60525	FCGR3A;PLCG2;RAC1
Sema4D induced cell migration and growth-cone collapse Homo sapiens R-HSA-416572	2021-01-24	0.339124	0.685847	0	0	2.50351	2.70727	RAC1
Insulin processing Homo sapiens R-HSA-264876	2021-01-24	0.339124	0.685847	0	0	2.50351	2.70727	EXOC3
Cytosolic tRNA aminoacylation Homo sapiens R-HSA-379716	2021-01-24	0.339124	0.685847	0	0	2.50351	2.70727	VARS
TRAF6 mediated NF-kB activation Homo sapiens R-HSA-933542	2021-01-24	0.339124	0.685847	0	0	2.50351	2.70727	HMGB1
Hemostasis Homo sapiens R-HSA-109582	11/552	0.345554	0.6951	0	0	1.17432	1.24784	AKAP10;ANXA2;SHC1;P2RX2;CAPZA1;PLCG2;KIF1C;HMG20B;KRAS;RAC1;YWHAZ
Mitotic Metaphase and Anaphase Homo sapiens R-HSA-2555396	4/174	0.34716	0.6951	0	0	1.35663	1.43527	KNTC1;FBXO5;NUP98;CKAP5
Post-translational modification: synthesis of GPI-anchored proteins Homo sapiens R-HSA-163125	2021-01-25	0.350438	0.6951	0	0	2.39907	2.51559	PIGB
Synthesis and interconversion of nucleotide di- and triphosphates Homo sapiens R-HSA-499943	2021-01-25	0.350438	0.6951	0	0	2.39907	2.51559	GUK1
Glyoxylate metabolism and glycine degradation Homo sapiens R-HSA-389661	2021-01-25	0.350438	0.6951	0	0	2.39907	2.51559	AMT
Budding and maturation of HIV virion Homo sapiens R-HSA-162588	2021-01-25	0.350438	0.6951	0	0	2.39907	2.51559	TSG101
RAF activation Homo sapiens R-HSA-5673000	2021-01-25	0.350438	0.6951	0	0	2.39907	2.51559	KRAS
Positive epigenetic regulation of rRNA expression Homo sapiens R-HSA-5250913	1973-02-01	0.35567	0.69663	0	0	1.62278	1.67755	POLR2F;HIST2H2AC
NoRC negatively regulates rRNA expression Homo sapiens R-HSA-427413	1973-02-01	0.35567	0.69663	0	0	1.62278	1.67755	POLR2F;HIST2H2AC
Phase 2 - plateau phase Homo sapiens R-HSA-5576893	2021-01-26	0.36156	0.69663	0	0	2.30299	2.3429	CACNA1C
N-glycan antennae elongation in the medial/trans-Golgi Homo sapiens R-HSA-975576	2021-01-26	0.36156	0.69663	0	0	2.30299	2.3429	FUCA1
FGFR2 alternative splicing Homo sapiens R-HSA-6803529	2021-01-26	0.36156	0.69663	0	0	2.30299	2.3429	POLR2F
Resolution of D-loop Structures through Synthesis-Dependent Strand Annealing (SDSA) Homo sapiens R-HSA-5693554	2021-01-26	0.36156	0.69663	0	0	2.30299	2.3429	TOP3A
TAK1 activates NFkB by phosphorylation and activation of IKKs complex Homo sapiens R-HSA-445989	2021-01-26	0.36156	0.69663	0	0	2.30299	2.3429	HMGB1
TNFR1-induced NFkappaB signaling pathway Homo sapiens R-HSA-5357956	2021-01-26	0.36156	0.69663	0	0	2.30299	2.3429	BIRC2
Sphingolipid metabolism Homo sapiens R-HSA-428157	1974-02-01	0.361849	0.69663	0	0	1.60016	1.62661	ALDH3A2;PRKD1
Integrin alphaIIb beta3 signaling Homo sapiens R-HSA-354192	2021-01-27	0.372491	0.69663	0	0	2.2143	2.18671	SHC1
Sema4D in semaphorin signaling Homo sapiens R-HSA-400685	2021-01-27	0.372491	0.69663	0	0	2.2143	2.18671	RAC1
Platelet calcium homeostasis Homo sapiens R-HSA-418360	2021-01-27	0.372491	0.69663	0	0	2.2143	2.18671	P2RX2
Phase 1 - inactivation of fast Na+ channels Homo sapiens R-HSA-5576894	2021-01-27	0.372491	0.69663	0	0	2.2143	2.18671	CACNA1C
EGFR downregulation Homo sapiens R-HSA-182971	2021-01-27	0.372491	0.69663	0	0	2.2143	2.18671	AP2M1
VEGFR2 mediated vascular permeability Homo sapiens R-HSA-5218920	2021-01-27	0.372491	0.69663	0	0	2.2143	2.18671	RAC1
Peroxisomal lipid metabolism Homo sapiens R-HSA-390918	2021-01-27	0.372491	0.69663	0	0	2.2143	2.18671	ALDH3A2
RNA Polymerase III Transcription Initiation From Type 2 Promoter Homo sapiens R-HSA-76066	2021-01-27	0.372491	0.69663	0	0	2.2143	2.18671	POLR2F
RNA Pol II CTD phosphorylation and interaction with CE Homo sapiens R-HSA-167160	2021-01-27	0.372491	0.69663	0	0	2.2143	2.18671	POLR2F
RNA Pol II CTD phosphorylation and interaction with CE Homo sapiens R-HSA-77075	2021-01-27	0.372491	0.69663	0	0	2.2143	2.18671	POLR2F
FCERI mediated MAPK activation Homo sapiens R-HSA-2871796	6/289	0.373652	0.69663	0	0	1.22255	1.20352	SHC1;RASA4;PLCG2;KRAS;RAC1;GFRA2
Negative epigenetic regulation of rRNA expression Homo sapiens R-HSA-5250941	1976-02-01	0.374139	0.69663	0	0	1.55676	1.53049	POLR2F;HIST2H2AC
RNA Polymerase I Promoter Clearance Homo sapiens R-HSA-73854	1976-02-01	0.374139	0.69663	0	0	1.55676	1.53049	POLR2F;HIST2H2AC
Transcription-Coupled Nucleotide Excision Repair (TC-NER) Homo sapiens R-HSA-6781827	1976-02-01	0.374139	0.69663	0	0	1.55676	1.53049	POLD4;POLR2F
Host Interactions of HIV factors Homo sapiens R-HSA-162909	3/129	0.379503	0.69663	0	0	1.37182	1.32915	NUP98;RAC1;AP2M1
Metabolism of proteins Homo sapiens R-HSA-392499	20/1074	0.379593	0.69663	0	0	1.09633	1.06196	EDEM3;NSF;EIF2B5;PIAS3;SHC1;FUCA1;DERL2;DOLK;HSCB;RPL3L;NAPG;HIST2H2AC;PIGB;ADAMTSL5;RFT1;TMED3;EXOC3;RPL26;NUP98;ADAMTS7
Adrenaline,noradrenaline inhibits insulin secretion Homo sapiens R-HSA-400042	2021-01-28	0.383236	0.69663	0	0	2.13218	2.04498	CACNA1C
Energy dependent regulation of mTOR by LKB1-AMPK Homo sapiens R-HSA-380972	2021-01-28	0.383236	0.69663	0	0	2.13218	2.04498	RRAGA
RNA Polymerase III Transcription Initiation From Type 1 Promoter Homo sapiens R-HSA-76061	2021-01-28	0.383236	0.69663	0	0	2.13218	2.04498	POLR2F
Recognition of DNA damage by PCNA-containing replication complex Homo sapiens R-HSA-110314	2021-01-28	0.383236	0.69663	0	0	2.13218	2.04498	POLD4
Endosomal Sorting Complex Required For Transport (ESCRT) Homo sapiens R-HSA-917729	2021-01-28	0.383236	0.69663	0	0	2.13218	2.04498	TSG101
Biosynthesis of the N-glycan precursor (dolichol lipid-linked oligosaccharide, LLO) and transfer to a nascent protein Homo sapiens R-HSA-446193	1978-02-01	0.386331	0.69663	0	0	1.51563	1.44146	RFT1;DOLK
G2/M DNA damage checkpoint Homo sapiens R-HSA-69473	1978-02-01	0.386331	0.69663	0	0	1.51563	1.44146	TOP3A;YWHAZ
Signalling to p38 via RIT and RIN Homo sapiens R-HSA-187706	5/239	0.388357	0.69663	0	0	1.23158	1.16487	RIT2;SHC1;RASA4;KRAS;GFRA2
ER to Golgi Anterograde Transport Homo sapiens R-HSA-199977	3/131	0.388763	0.69663	0	0	1.35025	1.27569	NSF;TMED3;NAPG
RNA Polymerase I Transcription Homo sapiens R-HSA-73864	1979-02-01	0.392389	0.69663	0	0	1.49587	1.39939	POLR2F;HIST2H2AC
RIG-I/MDA5 mediated induction of IFN-alpha/beta pathways Homo sapiens R-HSA-168928	1979-02-01	0.392389	0.69663	0	0	1.49587	1.39939	TBK1;HMGB1
Interaction between L1 and Ankyrins Homo sapiens R-HSA-445095	2021-01-29	0.393798	0.69663	0	0	2.05593	1.91596	SCN3A
COPI-independent Golgi-to-ER retrograde traffic Homo sapiens R-HSA-6811436	2021-01-29	0.393798	0.69663	0	0	2.05593	1.91596	PAFAH1B2
Activation of BH3-only proteins Homo sapiens R-HSA-114452	2021-01-29	0.393798	0.69663	0	0	2.05593	1.91596	YWHAZ
PIWI-interacting RNA (piRNA) biogenesis Homo sapiens R-HSA-5601884	2021-01-29	0.393798	0.69663	0	0	2.05593	1.91596	POLR2F
mRNA Capping Homo sapiens R-HSA-72086	2021-01-29	0.393798	0.69663	0	0	2.05593	1.91596	POLR2F
Amine compound SLC transporters Homo sapiens R-HSA-425428	2021-01-30	0.404179	0.69663	0	0	1.98493	1.79815	SLC6A2
Activation of Kainate Receptors upon glutamate binding Homo sapiens R-HSA-451326	2021-01-30	0.404179	0.69663	0	0	1.98493	1.79815	GRIK5
NEP/NS2 Interacts with the Cellular Export Machinery Homo sapiens R-HSA-168333	2021-01-30	0.404179	0.69663	0	0	1.98493	1.79815	NUP98
Regulation of Glucokinase by Glucokinase Regulatory Protein Homo sapiens R-HSA-170822	2021-01-30	0.404179	0.69663	0	0	1.98493	1.79815	NUP98
Transport of Ribonucleoproteins into the Host Nucleus Homo sapiens R-HSA-168271	2021-01-30	0.404179	0.69663	0	0	1.98493	1.79815	NUP98
RNA Polymerase I Promoter Opening Homo sapiens R-HSA-73728	2021-01-30	0.404179	0.69663	0	0	1.98493	1.79815	HIST2H2AC
RNA Polymerase I Promoter Escape Homo sapiens R-HSA-73772	2021-01-30	0.404179	0.69663	0	0	1.98493	1.79815	POLR2F
Cardiac conduction Homo sapiens R-HSA-5576891	3/135	0.407178	0.69663	0	0	1.30906	1.1762	ATP1A3;CACNA1C;SCN3A
Interleukin receptor SHC signaling Homo sapiens R-HSA-912526	5/245	0.408651	0.69663	0	0	1.20042	1.07425	SHC1;RASA4;INPPL1;KRAS;GFRA2
Global Genome Nucleotide Excision Repair (GG-NER) Homo sapiens R-HSA-5696399	1982-02-01	0.410396	0.69663	0	0	1.43956	1.28212	PIAS3;POLD4
Antigen processing-Cross presentation Homo sapiens R-HSA-1236975	1982-02-01	0.410396	0.69663	0	0	1.43956	1.28212	HLA-B;TAP1
Export of Viral Ribonucleoproteins from Nucleus Homo sapiens R-HSA-168274	2021-01-31	0.414383	0.69663	0	0	1.91867	1.69028	NUP98
Packaging Of Telomere Ends Homo sapiens R-HSA-171306	2021-01-31	0.414383	0.69663	0	0	1.91867	1.69028	HIST2H2AC
Pausing and recovery of Tat-mediated HIV elongation Homo sapiens R-HSA-167238	2021-01-31	0.414383	0.69663	0	0	1.91867	1.69028	POLR2F
Tat-mediated HIV elongation arrest and recovery Homo sapiens R-HSA-167243	2021-01-31	0.414383	0.69663	0	0	1.91867	1.69028	POLR2F
Regulation of TNFR1 signaling Homo sapiens R-HSA-5357905	2021-01-31	0.414383	0.69663	0	0	1.91867	1.69028	BIRC2
DAP12 interactions Homo sapiens R-HSA-2172127	7/359	0.416359	0.69663	0	0	1.14605	1.00418	SHC1;RASA4;HLA-B;PLCG2;KRAS;RAC1;GFRA2
Peptide ligand-binding receptors Homo sapiens R-HSA-375276	4/193	0.420602	0.69663	0	0	1.21906	1.05579	UTS2R;NPB;GALR3;SSTR3
TP53 Regulates Metabolic Genes Homo sapiens R-HSA-5628897	1984-02-01	0.422255	0.69663	0	0	1.4043	1.21072	RRAGA;YWHAZ
Viral mRNA Translation Homo sapiens R-HSA-192823	1984-02-01	0.422255	0.69663	0	0	1.4043	1.21072	RPL26;RPL3L
Peptide chain elongation Homo sapiens R-HSA-156902	1984-02-01	0.422255	0.69663	0	0	1.4043	1.21072	RPL26;RPL3L
Class I MHC mediated antigen processing & presentation Homo sapiens R-HSA-983169	6/305	0.422382	0.69663	0	0	1.15618	0.996443	RNF34;UBE2Q1;TRIM39;HLA-B;TAP1;UBE2V1
Activation of Matrix Metalloproteinases Homo sapiens R-HSA-1592389	1932-01-01	0.424412	0.69663	0	0	1.85668	1.59127	PRSS2
Nuclear import of Rev protein Homo sapiens R-HSA-180746	1932-01-01	0.424412	0.69663	0	0	1.85668	1.59127	NUP98
Vpr-mediated nuclear import of PICs Homo sapiens R-HSA-180910	1932-01-01	0.424412	0.69663	0	0	1.85668	1.59127	NUP98
DNA methylation Homo sapiens R-HSA-5334118	1932-01-01	0.424412	0.69663	0	0	1.85668	1.59127	HIST2H2AC
RNA Polymerase I Transcription Termination Homo sapiens R-HSA-73863	1932-01-01	0.424412	0.69663	0	0	1.85668	1.59127	POLR2F
Resolution of D-loop Structures through Holliday Junction Intermediates Homo sapiens R-HSA-5693568	1932-01-01	0.424412	0.69663	0	0	1.85668	1.59127	TOP3A
DNA strand elongation Homo sapiens R-HSA-69190	1932-01-01	0.424412	0.69663	0	0	1.85668	1.59127	POLD4
SMAD2/SMAD3:SMAD4 heterotrimer regulates transcription Homo sapiens R-HSA-2173796	1932-01-01	0.424412	0.69663	0	0	1.85668	1.59127	CCNK
TRAF6 mediated IRF7 activation Homo sapiens R-HSA-933541	1932-01-01	0.424412	0.69663	0	0	1.85668	1.59127	TBK1
Metabolism Homo sapiens R-HSA-1430728	34/1908	0.426364	0.69663	0	0	1.04758	0.893025	MOCS3;CARKD;ACY1;INPPL1;CACNA1C;OAZ2;CYGB;HMGCL;NFS1;CHST11;GUK1;UCP3;PLCG2;CA6;NDUFV3;PGLS;IP6K1;CA14;FDFT1;MANBA;AMT;RPL3L;COASY;COQ5;ALDH3A2;ITPKC;ALDH3A1;CYP2S1;PRKD1;RPL26;NUP98;CD320;PNPLA2;DPEP3
Meiosis Homo sapiens R-HSA-1500620	1985-02-01	0.428138	0.69663	0	0	1.38731	1.17687	TOP3A;HIST2H2AC
Interferon Signaling Homo sapiens R-HSA-913531	4/196	0.432061	0.69663	0	0	1.19983	1.00688	IFITM1;RNASEL;HLA-B;NUP98
Interleukin-2 signaling Homo sapiens R-HSA-451927	5/252	0.432211	0.69663	0	0	1.16598	0.978073	SHC1;RASA4;INPPL1;KRAS;GFRA2
Smooth Muscle Contraction Homo sapiens R-HSA-445355	1933-01-01	0.43427	0.69663	0	0	1.79857	1.50017	ANXA2
CD28 co-stimulation Homo sapiens R-HSA-389356	1933-01-01	0.43427	0.69663	0	0	1.79857	1.50017	RAC1
Transport of the SLBP independent Mature mRNA Homo sapiens R-HSA-159227	1933-01-01	0.43427	0.69663	0	0	1.79857	1.50017	NUP98
Rev-mediated nuclear export of HIV RNA Homo sapiens R-HSA-165054	1933-01-01	0.43427	0.69663	0	0	1.79857	1.50017	NUP98
Formation of the Early Elongation Complex Homo sapiens R-HSA-113418	1933-01-01	0.43427	0.69663	0	0	1.79857	1.50017	POLR2F
Formation of the HIV-1 Early Elongation Complex Homo sapiens R-HSA-167158	1933-01-01	0.43427	0.69663	0	0	1.79857	1.50017	POLR2F
Resolution of D-Loop Structures Homo sapiens R-HSA-5693537	1933-01-01	0.43427	0.69663	0	0	1.79857	1.50017	TOP3A
E2F mediated regulation of DNA replication Homo sapiens R-HSA-113510	1933-01-01	0.43427	0.69663	0	0	1.79857	1.50017	FBXO5
FGFR2 mutant receptor activation Homo sapiens R-HSA-1839126	1933-01-01	0.43427	0.69663	0	0	1.79857	1.50017	POLR2F
Signalling to ERKs Homo sapiens R-HSA-187687	5/253	0.435562	0.69663	0	0	1.16122	0.96511	RIT2;SHC1;RASA4;KRAS;GFRA2
Signaling by Rho GTPases Homo sapiens R-HSA-194315	7/367	0.438649	0.69663	0	0	1.12012	0.923038	KNTC1;NUP98;RAC1;IQGAP3;YWHAZ;CKAP5;HIST2H2AC
Selenocysteine synthesis Homo sapiens R-HSA-2408557	1987-02-01	0.439809	0.69663	0	0	1.35453	1.11263	RPL26;RPL3L
Eukaryotic Translation Termination Homo sapiens R-HSA-72764	1987-02-01	0.439809	0.69663	0	0	1.35453	1.11263	RPL26;RPL3L
Biological oxidations Homo sapiens R-HSA-211859	4/199	0.443458	0.69663	0	0	1.18119	0.960484	ALDH3A1;ACY1;CYP2S1;DPEP3
Striated Muscle Contraction Homo sapiens R-HSA-390522	1934-01-01	0.44396	0.69663	0	0	1.74398	1.41615	TCAP
Synthesis of PIPs at the plasma membrane Homo sapiens R-HSA-1660499	1934-01-01	0.44396	0.69663	0	0	1.74398	1.41615	INPPL1
Transport of the SLBP Dependant Mature mRNA Homo sapiens R-HSA-159230	1934-01-01	0.44396	0.69663	0	0	1.74398	1.41615	NUP98
Nuclear Pore Complex (NPC) Disassembly Homo sapiens R-HSA-3301854	1934-01-01	0.44396	0.69663	0	0	1.74398	1.41615	NUP98
Activated PKN1 stimulates transcription of AR (androgen receptor) regulated genes KLK2 and KLK3 Homo sapiens R-HSA-5625886	1934-01-01	0.44396	0.69663	0	0	1.74398	1.41615	HIST2H2AC
Negative regulators of RIG-I/MDA5 signaling Homo sapiens R-HSA-936440	1934-01-01	0.44396	0.69663	0	0	1.74398	1.41615	TBK1
Diseases of glycosylation Homo sapiens R-HSA-3781865	1988-02-01	0.445596	0.69663	0	0	1.33871	1.08214	ADAMTSL5;ADAMTS7
Eukaryotic Translation Elongation Homo sapiens R-HSA-156842	1989-02-01	0.451349	0.69663	0	0	1.32326	1.05267	RPL26;RPL3L
Nonsense Mediated Decay (NMD) independent of the Exon Junction Complex (EJC) Homo sapiens R-HSA-975956	1989-02-01	0.451349	0.69663	0	0	1.32326	1.05267	RPL26;RPL3L
Lysosome Vesicle Biogenesis Homo sapiens R-HSA-432720	1935-01-01	0.453485	0.69663	0	0	1.6926	1.3385	AP4B1
Interactions of Rev with host cellular proteins Homo sapiens R-HSA-177243	1935-01-01	0.453485	0.69663	0	0	1.6926	1.3385	NUP98
Interactions of Vpr with host cellular proteins Homo sapiens R-HSA-176033	1935-01-01	0.453485	0.69663	0	0	1.6926	1.3385	NUP98
SIRT1 negatively regulates rRNA Expression Homo sapiens R-HSA-427359	1935-01-01	0.453485	0.69663	0	0	1.6926	1.3385	HIST2H2AC
Regulation of TP53 Degradation Homo sapiens R-HSA-6804757	1935-01-01	0.453485	0.69663	0	0	1.6926	1.3385	RNF34
Base Excision Repair Homo sapiens R-HSA-73884	1935-01-01	0.453485	0.69663	0	0	1.6926	1.3385	POLD4
Resolution of Abasic Sites (AP sites) Homo sapiens R-HSA-73933	1935-01-01	0.453485	0.69663	0	0	1.6926	1.3385	POLD4
NGF signalling via TRKA from the plasma membrane Homo sapiens R-HSA-187037	7/374	0.458049	0.702148	0	0	1.09835	0.85757	RIT2;SHC1;RASA4;KRAS;GFRA2;AP2M1;DNM1
PCP/CE pathway Homo sapiens R-HSA-4086400	1991-02-01	0.462753	0.705011	0	0	1.29339	0.996639	RAC1;AP2M1
RHO GTPases Activate WASPs and WAVEs Homo sapiens R-HSA-5663213	1936-01-01	0.462847	0.705011	0	0	1.64416	1.26659	RAC1
Regulation of TP53 Expression and Degradation Homo sapiens R-HSA-6806003	1936-01-01	0.462847	0.705011	0	0	1.64416	1.26659	RNF34
Phase 1 - Functionalization of compounds Homo sapiens R-HSA-211945	1992-02-01	0.468402	0.711522	0	0	1.27895	0.969995	ALDH3A1;CYP2S1
Platelet Aggregation (Plug Formation) Homo sapiens R-HSA-76009	1937-01-01	0.472049	0.711522	0	0	1.5984	1.19988	SHC1
Apoptotic cleavage of cellular proteins Homo sapiens R-HSA-111465	1937-01-01	0.472049	0.711522	0	0	1.5984	1.19988	BIRC2
Transport of Mature mRNA Derived from an Intronless Transcript Homo sapiens R-HSA-159231	1937-01-01	0.472049	0.711522	0	0	1.5984	1.19988	NUP98
HDR through Single Strand Annealing (SSA) Homo sapiens R-HSA-5685938	1937-01-01	0.472049	0.711522	0	0	1.5984	1.19988	TOP3A
Translation Homo sapiens R-HSA-72766	3/151	0.478876	0.717092	0	0	1.16659	0.858974	EIF2B5;RPL26;RPL3L
MAP2K and MAPK activation Homo sapiens R-HSA-5674135	1938-01-01	0.481093	0.717092	0	0	1.55512	1.13788	KRAS
Transport of Mature mRNAs Derived from Intronless Transcripts Homo sapiens R-HSA-159234	1938-01-01	0.481093	0.717092	0	0	1.55512	1.13788	NUP98
Signaling by FGFR1 in disease Homo sapiens R-HSA-5655302	1938-01-01	0.481093	0.717092	0	0	1.55512	1.13788	KRAS
TNFR2 non-canonical NF-kB pathway Homo sapiens R-HSA-5668541	1995-02-01	0.485137	0.717092	0	0	1.23751	0.89512	LTB;BIRC2
M Phase Homo sapiens R-HSA-68886	5/268	0.485203	0.717092	0	0	1.09414	0.791271	KNTC1;FBXO5;NUP98;CKAP5;HIST2H2AC
Organelle biogenesis and maintenance Homo sapiens R-HSA-1852241	6/326	0.48545	0.717092	0	0	1.07913	0.779864	EXOC3;NPHP3;MARK4;PKD1;CKAP5;SSTR3
Collagen degradation Homo sapiens R-HSA-1442490	1939-01-01	0.489983	0.717092	0	0	1.51412	1.08015	PRSS2
mTOR signalling Homo sapiens R-HSA-165159	1939-01-01	0.489983	0.717092	0	0	1.51412	1.08015	RRAGA
NS1 Mediated Effects on Host Pathways Homo sapiens R-HSA-168276	1939-01-01	0.489983	0.717092	0	0	1.51412	1.08015	NUP98
tRNA modification in the nucleus and cytosol Homo sapiens R-HSA-6782315	1939-01-01	0.489983	0.717092	0	0	1.51412	1.08015	LCMT2
Presynaptic phase of homologous DNA pairing and strand exchange Homo sapiens R-HSA-5693616	1939-01-01	0.489983	0.717092	0	0	1.51412	1.08015	TOP3A
Dual Incision in GG-NER Homo sapiens R-HSA-5696400	1939-01-01	0.489983	0.717092	0	0	1.51412	1.08015	POLD4
SUMO E3 ligases SUMOylate target proteins Homo sapiens R-HSA-3108232	1996-02-01	0.490642	0.717092	0	0	1.22428	0.871737	PIAS3;NUP98
Formation of a pool of free 40S subunits Homo sapiens R-HSA-72689	1996-02-01	0.490642	0.717092	0	0	1.22428	0.871737	RPL26;RPL3L
Regulation of actin dynamics for phagocytic cup formation Homo sapiens R-HSA-2029482	1997-02-01	0.49611	0.718717	0	0	1.21133	0.849091	FCGR3A;RAC1
Anchoring of the basal body to the plasma membrane Homo sapiens R-HSA-5620912	1997-02-01	0.49611	0.718717	0	0	1.21133	0.849091	MARK4;CKAP5
Class C/3 (Metabotropic glutamate/pheromone receptors) Homo sapiens R-HSA-420499	1940-01-01	0.498722	0.718717	0	0	1.47522	1.02632	TAS2R9
PKB-mediated events Homo sapiens R-HSA-109703	1940-01-01	0.498722	0.718717	0	0	1.47522	1.02632	RRAGA
PRC2 methylates histones and DNA Homo sapiens R-HSA-212300	1940-01-01	0.498722	0.718717	0	0	1.47522	1.02632	HIST2H2AC
PKMTs methylate histone lysines Homo sapiens R-HSA-3214841	1940-01-01	0.498722	0.718717	0	0	1.47522	1.02632	ASH2L
Negative regulation of MAPK pathway Homo sapiens R-HSA-5675221	1940-01-01	0.498722	0.718717	0	0	1.47522	1.02632	KRAS
Immunoregulatory interactions between a Lymphoid and a non-Lymphoid cell Homo sapiens R-HSA-198933	3/157	0.504724	0.722442	0	0	1.12079	0.766333	IFITM1;FCGR3A;HLA-B
Signalling by NGF Homo sapiens R-HSA-166520	8/450	0.505705	0.722442	0	0	1.04132	0.709974	RIT2;SHC1;RASA4;KRAS;RAC1;GFRA2;AP2M1;DNM1
CLEC7A (Dectin-1) signaling Homo sapiens R-HSA-5607764	1999-02-01	0.506934	0.722442	0	0	1.18623	0.805897	PLCG2;UBE2V1
Elastic fibre formation Homo sapiens R-HSA-1566948	1941-01-01	0.507311	0.722442	0	0	1.43827	0.976055	ELN
Host Interactions with Influenza Factors Homo sapiens R-HSA-168253	1941-01-01	0.507311	0.722442	0	0	1.43827	0.976055	NUP98
Condensation of Prophase Chromosomes Homo sapiens R-HSA-2299718	1941-01-01	0.507311	0.722442	0	0	1.43827	0.976055	HIST2H2AC
Fc epsilon receptor (FCERI) signaling Homo sapiens R-HSA-2454202	7/395	0.515247	0.724247	0	0	1.03778	0.688157	SHC1;RASA4;PLCG2;KRAS;RAC1;UBE2V1;GFRA2
Netrin-1 signaling Homo sapiens R-HSA-373752	1942-01-01	0.515753	0.724247	0	0	1.40312	0.929043	RAC1
EPHB-mediated forward signaling Homo sapiens R-HSA-3928662	1942-01-01	0.515753	0.724247	0	0	1.40312	0.929043	RAC1
Glucose transport Homo sapiens R-HSA-70153	1942-01-01	0.515753	0.724247	0	0	1.40312	0.929043	NUP98
Activation of gene expression by SREBF (SREBP) Homo sapiens R-HSA-2426168	1942-01-01	0.515753	0.724247	0	0	1.40312	0.929043	FDFT1
Transcriptional regulation of pluripotent stem cells Homo sapiens R-HSA-452723	1942-01-01	0.515753	0.724247	0	0	1.40312	0.929043	POLR2F
Homologous DNA Pairing and Strand Exchange Homo sapiens R-HSA-5693579	1942-01-01	0.515753	0.724247	0	0	1.40312	0.929043	TOP3A
Cell surface interactions at the vascular wall Homo sapiens R-HSA-202733	2/101	0.517606	0.724247	0	0	1.16215	0.765325	SHC1;KRAS
SUMOylation Homo sapiens R-HSA-2990846	2/101	0.517606	0.724247	0	0	1.16215	0.765325	PIAS3;NUP98
TP53 Regulates Transcription of Cell Death Genes Homo sapiens R-HSA-5633008	1943-01-01	0.524051	0.724837	0	0	1.36964	0.885016	TNFRSF10B
ERCC6 (CSB) and EHMT2 (G9a) positively regulate rRNA expression Homo sapiens R-HSA-427389	1943-01-01	0.524051	0.724837	0	0	1.36964	0.885016	HIST2H2AC
HIV Transcription Elongation Homo sapiens R-HSA-167169	1943-01-01	0.524051	0.724837	0	0	1.36964	0.885016	POLR2F
Tat-mediated elongation of the HIV-1 transcript Homo sapiens R-HSA-167246	1943-01-01	0.524051	0.724837	0	0	1.36964	0.885016	POLR2F
Formation of HIV-1 elongation complex containing HIV-1 Tat Homo sapiens R-HSA-167200	1943-01-01	0.524051	0.724837	0	0	1.36964	0.885016	POLR2F
Formation of Incision Complex in GG-NER Homo sapiens R-HSA-5696395	1943-01-01	0.524051	0.724837	0	0	1.36964	0.885016	PIAS3
Separation of Sister Chromatids Homo sapiens R-HSA-2467813	3/162	0.525752	0.725799	0	0	1.08527	0.697747	KNTC1;NUP98;CKAP5
Kinesins Homo sapiens R-HSA-983189	1944-01-01	0.532207	0.727056	0	0	1.33772	0.84373	KIF1C
Transcriptional activity of SMAD2/SMAD3:SMAD4 heterotrimer Homo sapiens R-HSA-2173793	1944-01-01	0.532207	0.727056	0	0	1.33772	0.84373	CCNK
MAPK family signaling cascades Homo sapiens R-HSA-5683057	5/284	0.536382	0.727056	0	0	1.03055	0.641936	SHC1;RASA4;KRAS;RAC1;GFRA2
IRS-mediated signalling Homo sapiens R-HSA-112399	5/284	0.536382	0.727056	0	0	1.03055	0.641936	RRAGA;SHC1;RASA4;KRAS;GFRA2
DAP12 signaling Homo sapiens R-HSA-2424491	6/344	0.537736	0.727056	0	0	1.02071	0.633236	SHC1;RASA4;PLCG2;KRAS;RAC1;GFRA2
DNA Repair Homo sapiens R-HSA-73894	5/285	0.539505	0.727056	0	0	1.02681	0.633649	PIAS3;POLD4;USP10;TOP3A;POLR2F
ABC-family proteins mediated transport Homo sapiens R-HSA-382556	1945-01-01	0.540224	0.727056	0	0	1.30725	0.804968	RNASEL
NRAGE signals death through JNK Homo sapiens R-HSA-193648	1945-01-01	0.540224	0.727056	0	0	1.30725	0.804968	RAC1
Diseases of metabolism Homo sapiens R-HSA-5668914	1945-01-01	0.540224	0.727056	0	0	1.30725	0.804968	CD320
SUMOylation of RNA binding proteins Homo sapiens R-HSA-4570464	1945-01-01	0.540224	0.727056	0	0	1.30725	0.804968	NUP98
Major pathway of rRNA processing in the nucleolus Homo sapiens R-HSA-6791226	3/166	0.542215	0.727056	0	0	1.05842	0.64785	RPL26;RPP38;RPL3L
Nonsense-Mediated Decay (NMD) Homo sapiens R-HSA-927802	2/106	0.543606	0.727056	0	0	1.106	0.674139	RPL26;RPL3L
Nonsense Mediated Decay (NMD) enhanced by the Exon Junction Complex (EJC) Homo sapiens R-HSA-975957	2/106	0.543606	0.727056	0	0	1.106	0.674139	RPL26;RPL3L
L13a-mediated translational silencing of Ceruloplasmin expression Homo sapiens R-HSA-156827	2/106	0.543606	0.727056	0	0	1.106	0.674139	RPL26;RPL3L
3' -UTR-mediated translational regulation Homo sapiens R-HSA-157279	2/106	0.543606	0.727056	0	0	1.106	0.674139	RPL26;RPL3L
Insulin receptor signalling cascade Homo sapiens R-HSA-74751	5/287	0.545723	0.727056	0	0	1.01942	0.617409	RRAGA;SHC1;RASA4;KRAS;GFRA2
Mitotic Prophase Homo sapiens R-HSA-68875	2/107	0.548687	0.727056	0	0	1.09541	0.657492	NUP98;HIST2H2AC
SRP-dependent cotranslational protein targeting to membrane Homo sapiens R-HSA-1799339	2/107	0.548687	0.727056	0	0	1.09541	0.657492	RPL26;RPL3L
GTP hydrolysis and joining of the 60S ribosomal subunit Homo sapiens R-HSA-72706	2/107	0.548687	0.727056	0	0	1.09541	0.657492	RPL26;RPL3L
IGF1R signaling cascade Homo sapiens R-HSA-2428924	5/288	0.548817	0.727056	0	0	1.01577	0.609453	RRAGA;SHC1;RASA4;KRAS;GFRA2
Signaling by Type 1 Insulin-like Growth Factor 1 Receptor (IGF1R) Homo sapiens R-HSA-2404192	5/288	0.548817	0.727056	0	0	1.01577	0.609453	RRAGA;SHC1;RASA4;KRAS;GFRA2
IRS-related events triggered by IGF1R Homo sapiens R-HSA-2428928	5/288	0.548817	0.727056	0	0	1.01577	0.609453	RRAGA;SHC1;RASA4;KRAS;GFRA2
RNA Polymerase I Transcription Initiation Homo sapiens R-HSA-73762	1947-01-01	0.555849	0.7338	0	0	1.25029	0.734241	POLR2F
Respiratory electron transport, ATP synthesis by chemiosmotic coupling, and heat production by uncoupling proteins. Homo sapiens R-HSA-163200	2/109	0.558732	0.7338	0	0	1.07482	0.625638	UCP3;NDUFV3
G beta:gamma signalling through PI3Kgamma Homo sapiens R-HSA-392451	1948-01-01	0.563462	0.7338	0	0	1.22362	0.701938	SHC1
TP53 Regulates Transcription of Cell Cycle Genes Homo sapiens R-HSA-6791312	1948-01-01	0.563462	0.7338	0	0	1.22362	0.701938	BTG2
Hexose transport Homo sapiens R-HSA-189200	1948-01-01	0.563462	0.7338	0	0	1.22362	0.701938	NUP98
O-linked glycosylation Homo sapiens R-HSA-5173105	2/110	0.563694	0.7338	0	0	1.06481	0.610398	ADAMTSL5;ADAMTS7
Selenoamino acid metabolism Homo sapiens R-HSA-2408522	2/111	0.568617	0.7338	0	0	1.05499	0.595594	RPL26;RPL3L
Mitotic Anaphase Homo sapiens R-HSA-68882	3/173	0.570217	0.7338	0	0	1.01447	0.569868	KNTC1;NUP98;CKAP5
FCGR activation Homo sapiens R-HSA-2029481	1949-01-01	0.570945	0.7338	0	0	1.19807	0.671473	FCGR3A
Complex I biogenesis Homo sapiens R-HSA-6799198	1949-01-01	0.570945	0.7338	0	0	1.19807	0.671473	NDUFV3
GRB2 events in EGFR signaling Homo sapiens R-HSA-179812	4/235	0.573005	0.7338	0	0	0.995261	0.554222	SHC1;RASA4;KRAS;GFRA2
SHC1 events in EGFR signaling Homo sapiens R-HSA-180336	4/235	0.573005	0.7338	0	0	0.995261	0.554222	SHC1;RASA4;KRAS;GFRA2
SOS-mediated signalling Homo sapiens R-HSA-112412	4/235	0.573005	0.7338	0	0	0.995261	0.554222	SHC1;RASA4;KRAS;GFRA2
SHC1 events in ERBB4 signaling Homo sapiens R-HSA-1250347	4/235	0.573005	0.7338	0	0	0.995261	0.554222	SHC1;RASA4;KRAS;GFRA2
RAF/MAP kinase cascade Homo sapiens R-HSA-5673001	4/235	0.573005	0.7338	0	0	0.995261	0.554222	SHC1;RASA4;KRAS;GFRA2
HDR through Homologous Recombination (HR) or Single Strand Annealing (SSA) Homo sapiens R-HSA-5693567	2/112	0.573499	0.7338	0	0	1.04535	0.581213	POLD4;TOP3A
FRS-mediated FGFR2 signaling Homo sapiens R-HSA-5654700	4/236	0.576364	0.7338	0	0	0.99092	0.546013	SHC1;RASA4;KRAS;GFRA2
FRS-mediated FGFR4 signaling Homo sapiens R-HSA-5654712	4/236	0.576364	0.7338	0	0	0.99092	0.546013	SHC1;RASA4;KRAS;GFRA2
FRS-mediated FGFR3 signaling Homo sapiens R-HSA-5654706	4/236	0.576364	0.7338	0	0	0.99092	0.546013	SHC1;RASA4;KRAS;GFRA2
FRS-mediated FGFR1 signaling Homo sapiens R-HSA-5654693	4/236	0.576364	0.7338	0	0	0.99092	0.546013	SHC1;RASA4;KRAS;GFRA2
Chondroitin sulfate/dermatan sulfate metabolism Homo sapiens R-HSA-1793185	1950-01-01	0.5783	0.7338	0	0	1.17356	0.642715	CHST11
Metabolism of non-coding RNA Homo sapiens R-HSA-194441	1950-01-01	0.5783	0.7338	0	0	1.17356	0.642715	NUP98
snRNP Assembly Homo sapiens R-HSA-191859	1950-01-01	0.5783	0.7338	0	0	1.17356	0.642715	NUP98
Regulation of ornithine decarboxylase (ODC) Homo sapiens R-HSA-350562	1950-01-01	0.5783	0.7338	0	0	1.17356	0.642715	OAZ2
G-protein beta:gamma signalling Homo sapiens R-HSA-397795	1951-01-01	0.585529	0.737535	0	0	1.15003	0.615542	SHC1
Ion homeostasis Homo sapiens R-HSA-5578775	1951-01-01	0.585529	0.737535	0	0	1.15003	0.615542	ATP1A3
Nuclear Envelope Breakdown Homo sapiens R-HSA-2980766	1951-01-01	0.585529	0.737535	0	0	1.15003	0.615542	NUP98
Nuclear Receptor transcription pathway Homo sapiens R-HSA-383280	1951-01-01	0.585529	0.737535	0	0	1.15003	0.615542	RORB
ARMS-mediated activation Homo sapiens R-HSA-170984	4/239	0.58635	0.737535	0	0	0.978119	0.522157	SHC1;RASA4;KRAS;GFRA2
Epigenetic regulation of gene expression Homo sapiens R-HSA-212165	2/115	0.587904	0.737827	0	0	1.01744	0.540456	POLR2F;HIST2H2AC
G alpha (i) signalling events Homo sapiens R-HSA-418594	4/240	0.589649	0.737827	0	0	0.973924	0.514454	NPB;TAS2R9;GALR3;SSTR3
Frs2-mediated activation Homo sapiens R-HSA-170968	4/240	0.589649	0.737827	0	0	0.973924	0.514454	SHC1;RASA4;KRAS;GFRA2
Deposition of new CENPA-containing nucleosomes at the centromere Homo sapiens R-HSA-606279	1952-01-01	0.592634	0.738098	0	0	1.12742	0.589842	HIST2H2AC
Nucleosome assembly Homo sapiens R-HSA-774815	1952-01-01	0.592634	0.738098	0	0	1.12742	0.589842	HIST2H2AC
MAPK1/MAPK3 signaling Homo sapiens R-HSA-5684996	4/241	0.592932	0.738098	0	0	0.969765	0.506873	SHC1;RASA4;KRAS;GFRA2
Prolonged ERK activation events Homo sapiens R-HSA-169893	4/242	0.596199	0.738779	0	0	0.965641	0.49941	SHC1;RASA4;KRAS;GFRA2
rRNA processing Homo sapiens R-HSA-72312	3/180	0.597139	0.738779	0	0	0.974001	0.5022	RPL26;RPP38;RPL3L
Signaling by Leptin Homo sapiens R-HSA-2586552	4/243	0.599451	0.738779	0	0	0.961551	0.492065	SHC1;RASA4;KRAS;GFRA2
XBP1(S) activates chaperone genes Homo sapiens R-HSA-381038	1953-01-01	0.599618	0.738779	0	0	1.10568	0.565515	SHC1
Arachidonic acid metabolism Homo sapiens R-HSA-2142753	1953-01-01	0.599618	0.738779	0	0	1.10568	0.565515	DPEP3
Formation of TC-NER Pre-Incision Complex Homo sapiens R-HSA-6781823	1953-01-01	0.599618	0.738779	0	0	1.10568	0.565515	POLR2F
Homology Directed Repair Homo sapiens R-HSA-5693538	2/118	0.601945	0.740382	0	0	0.990974	0.503007	POLD4;TOP3A
Assembly of collagen fibrils and other multimeric structures Homo sapiens R-HSA-2022090	1954-01-01	0.606483	0.740915	0	0	1.08477	0.542469	COL4A2
Mitochondrial protein import Homo sapiens R-HSA-1268020	1954-01-01	0.606483	0.740915	0	0	1.08477	0.542469	HSCB
SCF-beta-TrCP mediated degradation of Emi1 Homo sapiens R-HSA-174113	1954-01-01	0.606483	0.740915	0	0	1.08477	0.542469	FBXO5
Degradation of AXIN Homo sapiens R-HSA-4641257	1954-01-01	0.606483	0.740915	0	0	1.08477	0.542469	RNF146
Signalling to RAS Homo sapiens R-HSA-167044	4/246	0.609113	0.741629	0	0	0.949484	0.470708	SHC1;RASA4;KRAS;GFRA2
ECM proteoglycans Homo sapiens R-HSA-3000178	1955-01-01	0.61323	0.741629	0	0	1.06462	0.520617	TNR
Ion transport by P-type ATPases Homo sapiens R-HSA-936837	1955-01-01	0.61323	0.741629	0	0	1.06462	0.520617	ATP1A3
IRE1alpha activates chaperones Homo sapiens R-HSA-381070	1955-01-01	0.61323	0.741629	0	0	1.06462	0.520617	SHC1
Regulation of cholesterol biosynthesis by SREBP (SREBF) Homo sapiens R-HSA-1655829	1955-01-01	0.61323	0.741629	0	0	1.06462	0.520617	FDFT1
Hh mutants that don't undergo autocatalytic processing are degraded by ERAD Homo sapiens R-HSA-5362768	1955-01-01	0.61323	0.741629	0	0	1.06462	0.520617	DERL2
VEGFR2 mediated cell proliferation Homo sapiens R-HSA-5218921	4/248	0.615474	0.743098	0	0	0.941604	0.457019	SHC1;RASA4;KRAS;GFRA2
Signaling by Insulin receptor Homo sapiens R-HSA-74752	5/311	0.616983	0.743676	0	0	0.938306	0.453121	RRAGA;SHC1;RASA4;KRAS;GFRA2
Meiotic synapsis Homo sapiens R-HSA-1221632	1957-01-01	0.626381	0.752491	0	0	1.0265	0.480192	HIST2H2AC
Hh mutants abrogate ligand secretion Homo sapiens R-HSA-5387390	1957-01-01	0.626381	0.752491	0	0	1.0265	0.480192	DERL2
Platelet activation, signaling and aggregation Homo sapiens R-HSA-76002	4/253	0.631095	0.756894	0	0	0.922459	0.424608	SHC1;PLCG2;RAC1;YWHAZ
Cell Cycle Homo sapiens R-HSA-1640170	9/566	0.634467	0.759677	0	0	0.926828	0.421679	POLD4;TERT;TOP3A;KNTC1;FBXO5;NUP98;YWHAZ;CKAP5;HIST2H2AC
VEGFA-VEGFR2 Pathway Homo sapiens R-HSA-4420097	5/320	0.641953	0.767368	0	0	0.911073	0.403824	SHC1;RASA4;KRAS;RAC1;GFRA2
PI Metabolism Homo sapiens R-HSA-1483255	1960-01-01	0.645276	0.770064	0	0	0.974154	0.426755	INPPL1
Cell death signalling via NRAGE, NRIF and NADE Homo sapiens R-HSA-204998	1961-01-01	0.65136	0.775848	0	0	0.957869	0.410632	RAC1
Antigen processing: Ubiquitination & Proteasome degradation Homo sapiens R-HSA-983168	4/260	0.652271	0.775848	0	0	0.896912	0.383247	RNF34;UBE2Q1;TRIM39;UBE2V1
Signaling by SCF-KIT Homo sapiens R-HSA-1433557	5/325	0.655381	0.778265	0	0	0.896606	0.37885	SHC1;RASA4;KRAS;RAC1;GFRA2
Cytochrome P450 - arranged by substrate type Homo sapiens R-HSA-211897	1962-01-01	0.65734	0.779309	0	0	0.942118	0.39527	CYP2S1
Cell-Cell communication Homo sapiens R-HSA-1500931	2/131	0.658611	0.779537	0	0	0.890515	0.371899	RAC1;LIMS1
Collagen biosynthesis and modifying enzymes Homo sapiens R-HSA-1650814	1963-01-01	0.663217	0.781224	0	0	0.926875	0.380624	COL4A2
Synthesis of substrates in N-glycan biosythesis Homo sapiens R-HSA-446219	1963-01-01	0.663217	0.781224	0	0	0.926875	0.380624	DOLK
Signaling by VEGF Homo sapiens R-HSA-194138	5/328	0.663283	0.781224	0	0	0.888141	0.364629	SHC1;RASA4;KRAS;RAC1;GFRA2
Hedgehog ligand biogenesis Homo sapiens R-HSA-5358346	1964-01-01	0.668994	0.786668	0	0	0.912117	0.366652	DERL2
Semaphorin interactions Homo sapiens R-HSA-373755	1967-01-01	0.68574	0.802438	0	0	0.870523	0.328411	RAC1
Integrin cell surface interactions Homo sapiens R-HSA-216083	1967-01-01	0.68574	0.802438	0	0	0.870523	0.328411	COL4A2
Macroautophagy Homo sapiens R-HSA-1632852	1967-01-01	0.68574	0.802438	0	0	0.870523	0.328411	RRAGA
Transport of Mature mRNA derived from an Intron-Containing Transcript Homo sapiens R-HSA-159236	1968-01-01	0.691132	0.806134	0	0	0.857487	0.316777	NUP98
Amyloid fiber formation Homo sapiens R-HSA-977225	1968-01-01	0.691132	0.806134	0	0	0.857487	0.316777	HIST2H2AC
Loss of Nlp from mitotic centrosomes Homo sapiens R-HSA-380259	1969-01-01	0.696431	0.809699	0	0	0.844834	0.305649	CKAP5
Loss of proteins required for interphase microtubule organization?from the centrosome Homo sapiens R-HSA-380284	1969-01-01	0.696431	0.809699	0	0	0.844834	0.305649	CKAP5
Beta-catenin independent WNT signaling Homo sapiens R-HSA-3858494	2/144	0.708644	0.818835	0	0	0.808451	0.278432	RAC1;AP2M1
Costimulation by the CD28 family Homo sapiens R-HSA-388841	1972-01-01	0.711792	0.818835	0	0	0.809012	0.275039	RAC1
ISG15 antiviral mechanism Homo sapiens R-HSA-1169408	1972-01-01	0.711792	0.818835	0	0	0.809012	0.275039	NUP98
Antiviral mechanism by IFN-stimulated genes Homo sapiens R-HSA-1169410	1972-01-01	0.711792	0.818835	0	0	0.809012	0.275039	NUP98
TRAF6 Mediated Induction of proinflammatory cytokines Homo sapiens R-HSA-168180	1972-01-01	0.711792	0.818835	0	0	0.809012	0.275039	HMGB1
AURKA Activation by TPX2 Homo sapiens R-HSA-8854518	1972-01-01	0.711792	0.818835	0	0	0.809012	0.275039	CKAP5
DNA Double-Strand Break Repair Homo sapiens R-HSA-5693532	2/145	0.712228	0.818835	0	0	0.802756	0.272421	POLD4;TOP3A
Metabolism of carbohydrates Homo sapiens R-HSA-71387	4/282	0.713425	0.818907	0	0	0.824997	0.278584	MANBA;CHST11;NUP98;PGLS
Extracellular matrix organization Homo sapiens R-HSA-1474244	4/283	0.716008	0.820103	0	0	0.821997	0.2746	COL4A2;ELN;TNR;PRSS2
Signaling by TGF-beta Receptor Complex Homo sapiens R-HSA-170834	1973-01-01	0.716738	0.820103	0	0	0.797735	0.265681	CCNK
Binding and Uptake of Ligands by Scavenger Receptors Homo sapiens R-HSA-2173782	1974-01-01	0.7216	0.823057	0	0	0.786767	0.25671	COL4A2
Transport of Mature Transcript to Cytoplasm Homo sapiens R-HSA-72202	1974-01-01	0.7216	0.823057	0	0	0.786767	0.25671	NUP98
G alpha (12/13) signalling events Homo sapiens R-HSA-416482	1975-01-01	0.726378	0.825656	0	0	0.776096	0.248106	RAC1
SUMOylation of DNA damage response and repair proteins Homo sapiens R-HSA-3108214	1975-01-01	0.726378	0.825656	0	0	0.776096	0.248106	NUP98
Diseases of signal transduction Homo sapiens R-HSA-5663202	4/288	0.728668	0.825656	0	0	0.807317	0.255546	SHC1;DERL2;POLR2F;KRAS
Signaling by EGFR Homo sapiens R-HSA-177929	5/355	0.729017	0.825656	0	0	0.818482	0.258688	SHC1;RASA4;KRAS;GFRA2;AP2M1
G2/M Checkpoints Homo sapiens R-HSA-69481	2/150	0.729596	0.825656	0	0	0.775437	0.244467	TOP3A;YWHAZ
Regulation of TP53 Activity Homo sapiens R-HSA-5633007	2/151	0.732962	0.828166	0	0	0.770193	0.23927	RNF34;TOP3A
Senescence-Associated Secretory Phenotype (SASP) Homo sapiens R-HSA-2559582	1977-01-01	0.735691	0.829951	0	0	0.755595	0.231926	HIST2H2AC
The citric acid (TCA) cycle and respiratory electron transport Homo sapiens R-HSA-1428517	2/153	0.739586	0.832298	0	0	0.759914	0.22924	UCP3;NDUFV3
Signaling by FGFR2 Homo sapiens R-HSA-5654738	5/361	0.742295	0.832298	0	0	0.804438	0.239729	SHC1;RASA4;POLR2F;KRAS;GFRA2
PI3K Cascade Homo sapiens R-HSA-109704	1979-01-01	0.744687	0.832298	0	0	0.736146	0.217009	RRAGA
Regulation of APC/C activators between G1/S and early anaphase Homo sapiens R-HSA-176408	1979-01-01	0.744687	0.832298	0	0	0.736146	0.217009	FBXO5
Centrosome maturation Homo sapiens R-HSA-380287	1979-01-01	0.744687	0.832298	0	0	0.736146	0.217009	CKAP5
Recruitment of mitotic centrosome proteins and complexes Homo sapiens R-HSA-380270	1979-01-01	0.744687	0.832298	0	0	0.736146	0.217009	CKAP5
Signaling by PDGF Homo sapiens R-HSA-186797	5/364	0.748753	0.833327	0	0	0.797591	0.23078	COL4A2;SHC1;RASA4;KRAS;GFRA2
Regulation of insulin secretion Homo sapiens R-HSA-422356	1980-01-01	0.749071	0.833327	0	0	0.72679	0.209986	CACNA1C
Regulation of HSF1-mediated heat shock response Homo sapiens R-HSA-3371453	1980-01-01	0.749071	0.833327	0	0	0.72679	0.209986	NUP98
Signaling by FGFR Homo sapiens R-HSA-190236	5/366	0.752992	0.834263	0	0	0.79309	0.225001	SHC1;RASA4;POLR2F;KRAS;GFRA2
Peptide hormone metabolism Homo sapiens R-HSA-2980736	1981-01-01	0.753379	0.834263	0	0	0.717669	0.203235	EXOC3
Processing of DNA double-strand break ends Homo sapiens R-HSA-5693607	1981-01-01	0.753379	0.834263	0	0	0.717669	0.203235	TOP3A
p75 NTR receptor-mediated signalling Homo sapiens R-HSA-193704	1983-01-01	0.761775	0.841632	0	0	0.700093	0.190498	RAC1
Signaling by the B Cell Receptor (BCR) Homo sapiens R-HSA-983705	3/233	0.763817	0.841632	0	0	0.747518	0.201402	SHC1;PLCG2;KRAS
Phospholipid metabolism Homo sapiens R-HSA-1483257	2/161	0.764696	0.841632	0	0	0.721384	0.19353	INPPL1;PNPLA2
Cellular Senescence Homo sapiens R-HSA-2559583	2/161	0.764696	0.841632	0	0	0.721384	0.19353	HIST1H1E;HIST2H2AC
Metabolism of polyamines Homo sapiens R-HSA-351202	1984-01-01	0.765865	0.841636	0	0	0.691623	0.184489	OAZ2
Collagen formation Homo sapiens R-HSA-1474290	1985-01-01	0.769886	0.842209	0	0	0.683354	0.178706	COL4A2
APC/C-mediated degradation of cell cycle proteins Homo sapiens R-HSA-174143	1985-01-01	0.769886	0.842209	0	0	0.683354	0.178706	FBXO5
Regulation of mitotic cell cycle Homo sapiens R-HSA-453276	1985-01-01	0.769886	0.842209	0	0	0.683354	0.178706	FBXO5
Cell junction organization Homo sapiens R-HSA-446728	1986-01-01	0.773838	0.842701	0	0	0.67528	0.173137	LIMS1
Unfolded Protein Response (UPR) Homo sapiens R-HSA-381119	1986-01-01	0.773838	0.842701	0	0	0.67528	0.173137	SHC1
Regulation of mRNA stability by proteins that bind AU-rich elements Homo sapiens R-HSA-450531	1986-01-01	0.773838	0.842701	0	0	0.67528	0.173137	YWHAZ
Platelet homeostasis Homo sapiens R-HSA-418346	1987-01-01	0.777722	0.843116	0	0	0.667394	0.167774	P2RX2
Metabolism of nucleotides Homo sapiens R-HSA-15869	1987-01-01	0.777722	0.843116	0	0	0.667394	0.167774	GUK1
Regulation of PLK1 Activity at G2/M Transition Homo sapiens R-HSA-2565942	1987-01-01	0.777722	0.843116	0	0	0.667394	0.167774	CKAP5
Respiratory electron transport Homo sapiens R-HSA-611105	1988-01-01	0.781539	0.845984	0	0	0.659689	0.162607	NDUFV3
Regulation of TP53 Activity through Phosphorylation Homo sapiens R-HSA-6804756	1989-01-01	0.785292	0.848773	0	0	0.652159	0.157627	TOP3A
Oxidative Stress Induced Senescence Homo sapiens R-HSA-2559580	1991-01-01	0.792604	0.855396	0	0	0.637602	0.148199	HIST2H2AC
MAPK6/MAPK4 signaling Homo sapiens R-HSA-5687128	1992-01-01	0.796167	0.857959	0	0	0.630563	0.143735	RAC1
Interferon gamma signaling Homo sapiens R-HSA-877300	1993-01-01	0.799668	0.860448	0	0	0.623677	0.139428	HLA-B
Cell Cycle, Mitotic Homo sapiens R-HSA-69278	6/462	0.805026	0.864308	0	0	0.751958	0.163085	POLD4;KNTC1;FBXO5;NUP98;CKAP5;HIST2H2AC
Class A/1 (Rhodopsin-like receptors) Homo sapiens R-HSA-373076	4/323	0.80565	0.864308	0	0	0.717442	0.155043	UTS2R;NPB;GALR3;SSTR3
Cellular response to heat stress Homo sapiens R-HSA-3371556	1996-01-01	0.809818	0.865723	0	0	0.603889	0.127388	NUP98
Synthesis of DNA Homo sapiens R-HSA-69239	1997-01-01	0.813085	0.865723	0	0	0.597568	0.123648	POLD4
Downstream signaling of activated FGFR2 Homo sapiens R-HSA-5654696	4/329	0.816892	0.865723	0	0	0.703978	0.142379	SHC1;RASA4;KRAS;GFRA2
Downstream signaling of activated FGFR4 Homo sapiens R-HSA-5654716	4/329	0.816892	0.865723	0	0	0.703978	0.142379	SHC1;RASA4;KRAS;GFRA2
Downstream signaling of activated FGFR3 Homo sapiens R-HSA-5654708	4/329	0.816892	0.865723	0	0	0.703978	0.142379	SHC1;RASA4;KRAS;GFRA2
Signaling by ERBB4 Homo sapiens R-HSA-1236394	4/330	0.818713	0.865723	0	0	0.701782	0.140372	SHC1;RASA4;KRAS;GFRA2
Transport of inorganic cations/anions and amino acids/oligopeptides Homo sapiens R-HSA-425393	1999-01-01	0.819454	0.865723	0	0	0.585313	0.116546	SLC34A3
Potassium Channels Homo sapiens R-HSA-1296071	1999-01-01	0.819454	0.865723	0	0	0.585313	0.116546	HCN2
Downstream TCR signaling Homo sapiens R-HSA-202424	1999-01-01	0.819454	0.865723	0	0	0.585313	0.116546	UBE2V1
Cell Cycle Checkpoints Homo sapiens R-HSA-69620	2/182	0.820835	0.865723	0	0	0.636536	0.125673	TOP3A;YWHAZ
Signaling by FGFR4 Homo sapiens R-HSA-5654743	4/332	0.82231	0.865723	0	0	0.697431	0.136444	SHC1;RASA4;KRAS;GFRA2
Downstream signaling of activated FGFR1 Homo sapiens R-HSA-5654687	4/332	0.82231	0.865723	0	0	0.697431	0.136444	SHC1;RASA4;KRAS;GFRA2
Stimuli-sensing channels Homo sapiens R-HSA-2672351	1/100	0.822557	0.865723	0	0	0.579371	0.113173	BEST1
Signaling by FGFR3 Homo sapiens R-HSA-5654741	4/333	0.824086	0.86607	0	0	0.695275	0.134522	SHC1;RASA4;KRAS;GFRA2
Transport of glucose and other sugars, bile salts and organic acids, metal ions and amine compounds Homo sapiens R-HSA-425366	1/101	0.825606	0.866406	0	0	0.573548	0.109913	SLC6A2
Metabolism of amino acids and derivatives Homo sapiens R-HSA-71291	4/335	0.827596	0.866534	0	0	0.691003	0.130759	AMT;RPL26;OAZ2;RPL3L
Glycerophospholipid biosynthesis Homo sapiens R-HSA-1483206	1/102	0.828603	0.866534	0	0	0.567841	0.106762	PNPLA2
Signaling by FGFR1 Homo sapiens R-HSA-5654736	4/336	0.829328	0.866534	0	0	0.688886	0.128917	SHC1;RASA4;KRAS;GFRA2
DNA Replication Homo sapiens R-HSA-69306	1/105	0.83729	0.872724	0	0	0.551376	0.0979158	POLD4
Downstream signal transduction Homo sapiens R-HSA-186763	4/341	0.837777	0.872724	0	0	0.678489	0.120095	SHC1;RASA4;KRAS;GFRA2
SLC-mediated transmembrane transport Homo sapiens R-HSA-425407	3/268	0.839761	0.872724	0	0	0.647621	0.113099	SLC34A3;NUP98;SLC6A2
Degradation of the extracellular matrix Homo sapiens R-HSA-1474228	1/106	0.840087	0.872724	0	0	0.546097	0.0951571	PRSS2
Integration of energy metabolism Homo sapiens R-HSA-163685	1/110	0.850804	0.882587	0	0	0.525949	0.0849795	CACNA1C
FCERI mediated NF-kB activation Homo sapiens R-HSA-2871837	1/111	0.853369	0.883978	0	0	0.521141	0.0826336	UBE2V1
G1/S Transition Homo sapiens R-HSA-69206	1/112	0.855891	0.88532	0	0	0.51642	0.0803614	FBXO5
PPARA activates gene expression Homo sapiens R-HSA-1989781	1/113	0.858369	0.886613	0	0	0.511783	0.0781602	FDFT1
Gastrin-CREB signalling pathway via PKC and MAPK Homo sapiens R-HSA-881907	5/432	0.86454	0.889698	0	0	0.668212	0.0972637	UTS2R;SHC1;RASA4;KRAS;GFRA2
Ion channel transport Homo sapiens R-HSA-983712	2/203	0.86468	0.889698	0	0	0.569418	0.0827909	ATP1A3;BEST1
Regulation of lipid metabolism by Peroxisome proliferator-activated receptor alpha (PPARalpha) Homo sapiens R-HSA-400206	1/116	0.865551	0.889698	0	0	0.498355	0.071957	FDFT1
Signal Transduction Homo sapiens R-HSA-162582	36/2465	0.866285	0.889698	0	0	0.834476	0.119782	NPB;CCNK;TAS2R9;SHC1;DERL2;ASH2L;IQGAP3;HIST2H2AC;SOX3;TERT;GALR3;TNFSF10;POLR2F;KNTC1;RAC1;AP2M1;UTS2R;MST1;SOX13;TNFRSF10B;CFLAR;GFRA2;SSTR3;YWHAZ;CKAP5;DNM1;RNF146;RRAGA;RIT2;COL4A2;RASA4;KRAS;NUP98;OR7C2;BIRC2;NSMAF
TCR signaling Homo sapiens R-HSA-202403	1/118	0.870136	0.892384	0	0	0.489786	0.0681319	UBE2V1
Cellular responses to stress Homo sapiens R-HSA-2262752	4/367	0.876257	0.896593	0	0	0.629045	0.0830942	RRAGA;HIST1H1E;NUP98;HIST2H2AC
Glycosaminoglycan metabolism Homo sapiens R-HSA-1630316	1/121	0.876723	0.896593	0	0	0.477468	0.0628175	CHST11
Rho GTPase cycle Homo sapiens R-HSA-194840	1/122	0.878844	0.896998	0	0	0.473498	0.0611511	RAC1
Metabolism of lipids and lipoproteins Homo sapiens R-HSA-556833	8/659	0.879605	0.896998	0	0	0.69932	0.0897105	ALDH3A2;HMGCL;INPPL1;PRKD1;FDFT1;PNPLA2;DPEP3;COQ5
GPCR ligand binding Homo sapiens R-HSA-500792	5/447	0.88297	0.897901	0	0	0.645031	0.0802831	UTS2R;NPB;TAS2R9;GALR3;SSTR3
S Phase Homo sapiens R-HSA-69242	1/124	0.882977	0.897901	0	0	0.465751	0.0579654	POLD4
Fatty acid, triacylglycerol, and ketone body metabolism Homo sapiens R-HSA-535734	2/217	0.888209	0.90195	0	0	0.531956	0.0630627	HMGCL;FDFT1
Signaling by Hedgehog Homo sapiens R-HSA-5358351	1/136	0.904985	0.916408	0	0	0.42409	0.0423399	DERL2
Mitotic G1-G1/S phases Homo sapiens R-HSA-453279	1/136	0.904985	0.916408	0	0	0.42409	0.0423399	FBXO5
Role of LAT2/NTAL/LAB on calcium mobilization Homo sapiens R-HSA-2730905	1/162	0.939526	0.950053	0	0	0.35513	0.022153	SHC1
Transmembrane transport of small molecules Homo sapiens R-HSA-382551	6/594	0.942823	0.952053	0	0	0.579142	0.0340982	SLC34A3;RNASEL;ATP1A3;NUP98;SLC6A2;BEST1
G2/M Transition Homo sapiens R-HSA-69275	1/173	0.950057	0.958018	0	0	0.332231	0.0170214	CKAP5
Mitotic G2-G2/M phases Homo sapiens R-HSA-453274	1/175	0.951765	0.958402	0	0	0.328378	0.0162341	CKAP5
G alpha (q) signalling events Homo sapiens R-HSA-416476	1/191	0.96349	0.968144	0	0	0.300478	0.0111756	UTS2R
Downstream signaling events of B Cell Receptor (BCR) Homo sapiens R-HSA-1168372	1/192	0.964121	0.968144	0	0	0.29889	0.0109211	KRAS
GPCR downstream signaling Homo sapiens R-HSA-388396	8/983	0.995037	0.997801	0	0	0.458971	0.00228345	UTS2R;NPB;TAS2R9;GALR3;SHC1;RAC1;OR7C2;SSTR3
Signaling by GPCR Homo sapiens R-HSA-372790	11/1293	0.997537	0.99892	0	0	0.476352	0.00117489	UTS2R;NPB;TAS2R9;GALR3;SHC1;RASA4;KRAS;RAC1;OR7C2;GFRA2;SSTR3
Olfactory Signaling Pathway Homo sapiens R-HSA-381753	1/418	0.999312	0.999312	0	0	0.135312	9.30738e-05	OR7C2

## Sheet: Table S7
Table S7. Enrichment analyses for the black module. Terms that appear in the histogram (Figure 8) are highlighted in grey. In bold, HH genes
Term (Reactome)	Nº genes	Adjusted p-value	Odds Ratio	Genes
Membrane Trafficking Homo sapiens R-HSA-199991	17	0.0413809	2.49922	NSF;TSG101;GCC1;CLINT1;AP4B1;YWHAZ;NAPG;DNM1;RAB10;GOLGA1;MYO6;TMED3;KIF1C;EXOC3;RAC1;PAFAH1B2;AP2M1
Toll Like Receptor 4 (TLR4) Cascade Homo sapiens R-HSA-166016	10	0.00685483	5.25656	TLR1;TBK1;PLCG2;UBE2V1;HMGB1;IRAK4;TLR6;DNM1;BIRC2;TLR2
Toll-Like Receptors Cascades Homo sapiens R-HSA-168898	10	0.0148776	4.52456	TLR1;TBK1;PLCG2;UBE2V1;HMGB1;IRAK4;TLR6;DNM1;BIRC2;TLR2
Activated TLR4 signalling Homo sapiens R-HSA-166054	8	0.033327	4.50345	TLR1;TBK1;UBE2V1;HMGB1;IRAK4;TLR6;BIRC2;TLR2
RNA polymerase II transcribes snRNA genes Homo sapiens R-HSA-6807505	7	0.0278082	5.84716	ZNF143;CCNK;GTF2B;POLR2F;RPRD1B;RPAP2;GTF2E1
Regulated Necrosis Homo sapiens R-HSA-5218859	5	0.00191758	26.4999	MLKL;TNFSF10;TNFRSF10B;CFLAR;BIRC2
RIPK1-mediated regulated necrosis Homo sapiens R-HSA-5213460	5	0.00191758	26.4999	MLKL;TNFSF10;TNFRSF10B;CFLAR;BIRC2
MyD88 deficiency (TLR2/4) Homo sapiens R-HSA-5602498	4	0.00455106	33.2223	TLR1;IRAK4;TLR6;TLR2
IRAK4 deficiency (TLR2/4) Homo sapiens R-HSA-5603041	4	0.00455106	33.2223	TLR1;IRAK4;TLR6;TLR2
Regulation of necroptotic cell death Homo sapiens R-HSA-5675482	4	0.00883658	23.2521	TNFSF10;TNFRSF10B;CFLAR;BIRC2
Diseases associated with the TLR signaling cascade Homo sapiens R-HSA-5602358	4	0.033327	11.6201	TLR1;IRAK4;TLR6;TLR2
Diseases of Immune System Homo sapiens R-HSA-5260271	4	0.033327	11.6201	TLR1;IRAK4;TLR6;TLR2
TRAIL signaling Homo sapiens R-HSA-75158	3	0.0148776	43.4823	TNFSF10;TNFRSF10B;CFLAR
Gap junction degradation Homo sapiens R-HSA-190873	3	0.033327	24.8432	MYO6;DNM1;AP2M1
CASP8 activity is inhibited Homo sapiens R-HSA-5218900	3	0.033327	21.7367	TNFSF10;TNFRSF10B;CFLAR
Regulation by c-FLIP Homo sapiens R-HSA-3371378	3	0.033327	21.7367	TNFSF10;TNFRSF10B;CFLAR
Dimerization of procaspase-8 Homo sapiens R-HSA-69416	3	0.033327	21.7367	TNFSF10;TNFRSF10B;CFLAR
Term (GO BP)	Nº genes	Adjusted p-value	Odds Ratio	Genes
positive regulation of intracellular signal transduction (GO:1902533)	23	0.0317287	2.63793	HEXIM1;SHC1;MUL1;TNFRSF10B;HMGB1;IRAK4;CFLAR;SLC9A3R1;RRAGA;TBK1;RIT2;P2RX2;UBD;TNFSF10;PLCG2;PRKD1;RAC1;TLR6;UBE2V1;ALPK1;BIRC2;TLR2;LIMS1
regulation of I-kappaB kinase/NF-kappaB signaling (GO:0043122)	15	0.0155539	4.26869	USP10;MUL1;TNFRSF10B;IRAK4;CFLAR;TBK1;TRIM39;UBD;TNFSF10;PLCG2;PRKD1;TLR6;UBE2V1;ALPK1;BIRC2
positive regulation of I-kappaB kinase/NF-kappaB signaling (GO:0043123)	12	0.0317287	4.45946	TBK1;UBD;TNFSF10;MUL1;TNFRSF10B;PRKD1;UBE2V1;IRAK4;TLR6;CFLAR;ALPK1;BIRC2
pattern recognition receptor signaling pathway (GO:0002221)	7	0.0317287	7.58585	TLR1;PLCG2;HMGB1;IRAK4;TLR6;ALPK1;TLR2
dephosphorylation of RNA polymerase II C-terminal domain (GO:0070940)	3	0.0317287	86.9735	SSU72;RPRD1B;RPAP2
cellular response to bacterial lipopeptide (GO:0071221)	3	0.0317711	57.9794	TLR1;TLR6;TLR2
