# Supplementary material for: Blood Leukocyte Transcriptional Modules and Differentially Expressed Genes Associated with Disease Severity and Age in COVID-19 Patients
Source: Preprints.org preprint supplement (doi:10.20944/preprints202208.0181.v1), 2022-08-09
Supplement: Supplementary file 6 [file TableS8_Bando et al.xlsx]

## Sheet: Table S8
Table S8. Enrichment analyses for DEGs obtained from the Severe vs Mild group comparison. Terms in bold contain DEGs selected as potential biomarkers. The terms highlighted in grey appear in the histogram (Figure 9)
GO BP-2021 Term (p<0.01)	Nº genes	p-value	Adjusted p-value	Odds Ratio	Genes
neutrophil degranulation (GO:0043312)	13	2.07016e-10	4.81982e-08	13.8746	ORM1;ARG1;HP;GGH;MPO;ORM2;LCN2;STOM;CEACAM8;GYG1;CAMP;LTF;TXNDC5
neutrophil activation involved in immune response (GO:0002283)	13	2.29165e-10	4.81982e-08	13.7542	ORM1;ARG1;HP;GGH;MPO;ORM2;LCN2;STOM;CEACAM8;GYG1;CAMP;LTF;TXNDC5
neutrophil mediated immunity (GO:0002446)	13	2.4717e-10	4.81982e-08	13.6653	ORM1;ARG1;HP;GGH;MPO;ORM2;LCN2;STOM;CEACAM8;GYG1;CAMP;LTF;TXNDC5
mitotic nuclear membrane disassembly (GO:0007077)	3	3.58692e-06	0.000524586	135.639	CCNB2;CCNB1;CDK1
nuclear membrane disassembly (GO:0051081)	3	5.91297e-06	0.000561221	110.967	CCNB2;CCNB1;CDK1
defense response to bacterium (GO:0042742)	6	6.20549e-06	0.000561221	15.1749	SELP;LCN2;MPO;CAMP;MPEG1;LTF
mitotic sister chromatid segregation (GO:0000070)	5	6.71547e-06	0.000561221	21.7712	CCNB1;CDCA5;CDK1;CEP55;ZWINT
regulation of protein serine/threonine kinase activity (GO:0071900)	5	1.0153e-05	0.000742435	19.9137	CCNB2;CCNB1;LTF;SNCA;CDKN3
positive regulation of mitotic cell cycle phase transition (GO:1901992)	4	1.55358e-05	0.00100983	30.7006	CCNB1;UBE2C;CDCA5;CDK1
defense response to Gram-negative bacterium (GO:0050829)	4	3.87261e-05	0.00226548	24.0085	SELP;CAMP;MPEG1;LTF
mitotic chromosome condensation (GO:0007076)	3	4.63948e-05	0.00246736	50.8265	CCNB1;CDCA5;CDK1
iron coordination entity transport (GO:1901678)	2	0.000138076	0.00673118	159.544	LCN2;LTF
mitotic cell cycle phase transition (GO:0044772)	5	0.000207114	0.00909953	10.2962	CCNB2;CCNB1;UBE2C;CDK1;CDKN3
chromosome condensation (GO:0030261)	3	0.000217766	0.00909953	29.0175	CCNB1;CDCA5;CDK1
mitotic metaphase plate congression (GO:0007080)	3	0.000316096	0.0104305	25.3827	CCNB1;CDCA5;CEP55
mitotic nuclear membrane organization (GO:0101024)	3	0.000316096	0.0104305	25.3827	CCNB2;CCNB1;CDK1
mitotic nuclear membrane reassembly (GO:0007084)	3	0.000316096	0.0104305	25.3827	CCNB2;CCNB1;CDK1
microtubule cytoskeleton organization involved in mitosis (GO:1902850)	4	0.000341633	0.0104305	13.3226	CCNB1;BIRC5;ZWINT;SPC25
positive regulation of alcohol biosynthetic process (GO:1902932)	2	0.000359227	0.0104305	88.6178	BMP6;SNCA
nuclear membrane reassembly (GO:0031468)	3	0.00037443	0.0104305	23.886	CCNB2;CCNB1;CDK1
regulation of cyclin-dependent protein kinase activity (GO:1904029)	3	0.00037443	0.0104305	23.886	CCNB2;CCNB1;CDKN3
negative regulation of oxidoreductase activity (GO:0051354)	2	0.000430355	0.0113554	79.752	HP;SNCA
negative regulation of programmed cell death (GO:0043069)	6	0.000446453	0.0113554	6.808	CDK1;BIRC5;MPO;LTF;TXNDC5;SNCA
response to iron ion (GO:0010039)	2	0.000507756	0.0123766	72.4982	BMP6;SNCA
positive regulation of cell death (GO:0010942)	3	0.000675765	0.0158129	19.3246	HP;HPR;SNCA
mitotic spindle organization (GO:0007052)	4	0.000738031	0.0166057	10.7816	CCNB1;BIRC5;ZWINT;SPC25
regulation of interleukin-1 production (GO:0032652)	2	0.000777274	0.0168409	56.9543	ORM1;ORM2
innate immune response (GO:0045087)	5	0.00110445	0.0230751	7.03883	TREML1;LCN2;CAMP;LTF;SNCA
positive regulation of G2/M transition of mitotic cell cycle (GO:0010971)	2	0.00122252	0.023427	44.2889	CCNB1;CDK1
regulated exocytosis (GO:0045055)	4	0.00122645	0.023427	9.36174	SELP;ORM1;ORM2;SNCA
regulation of cyclin-dependent protein serine/threonine kinase activity (GO:0000079)	3	0.00127012	0.023427	15.3983	CCNB2;CCNB1;CDKN3
regulation of lipopolysaccharide-mediated signaling pathway (GO:0031664)	2	0.00134897	0.023427	41.9558	BMP6;LTF
innate immune response in mucosa (GO:0002227)	2	0.00134897	0.023427	41.9558	CAMP;LTF
anaphase-promoting complex-dependent catabolic process (GO:0031145)	3	0.00136157	0.023427	15.0166	CCNB1;UBE2C;CDK1
regulation of mitotic cell cycle phase transition (GO:1901990)	4	0.00143943	0.024059	8.95109	CCNB1;UBE2C;CDK1;HMMR
negative regulation of apoptotic process (GO:0043066)	6	0.00156066	0.0253607	5.30153	CDK1;BIRC5;MPO;LTF;TXNDC5;SNCA
positive regulation of cell cycle G2/M phase transition (GO:1902751)	2	0.00161979	0.0256102	37.9562	CCNB1;CDK1
regulation of cell cycle phase transition (GO:1901987)	3	0.00193857	0.0298438	13.2138	CCNB1;UBE2C;CDK1
regulation of mitotic metaphase/anaphase transition (GO:0030071)	2	0.00207041	0.0310562	33.2067	CCNB1;UBE2C
acute inflammatory response (GO:0002526)	2	0.00223233	0.0326479	31.8768	HP;HPR
regulation of cell death (GO:0010941)	3	0.00237423	0.0334295	12.2752	HP;HPR;SNCA
mucosal immune response (GO:0002385)	2	0.00240006	0.0334295	30.6492	CAMP;LTF
positive regulation of cellular metabolic process (GO:0031325)	3	0.00257801	0.035073	11.9124	CCNB1;CDK1;SNCA
CENP-A containing chromatin organization (GO:0061641)	2	0.00275282	0.0357867	28.4571	HJURP;OIP5
CENP-A containing nucleosome assembly (GO:0034080)	2	0.00275282	0.0357867	28.4571	HJURP;OIP5
chromatin remodeling at centromere (GO:0031055)	2	0.00312845	0.0397857	26.5573	HJURP;OIP5
regulation of protein-containing complex assembly (GO:0043254)	3	0.00341649	0.0425244	10.7468	SELP;BIK;HJURP
positive regulation of bone mineralization (GO:0030501)	2	0.00394735	0.0481084	23.4282	BMP6;LTF
regulation of tumor necrosis factor production (GO:0032680)	3	0.00411984	0.0483311	10.0322	ORM1;ORM2;LTF
centromere complex assembly (GO:0034508)	2	0.004166	0.0483311	22.7577	HJURP;OIP5
platelet degranulation (GO:0002576)	3	0.00421348	0.0483311	9.94948	SELP;ORM1;ORM2
histone exchange (GO:0043486)	2	0.00439016	0.0493894	22.1244	HJURP;OIP5
KEGG-2021 Term (p<0.05)	Overlap	P-value	Adjusted P-value	Odds Ratio	Genes
p53 signaling pathway	4	3.87261e-05	0.00220739	24.0085	CCNB2;CCNB1;RRM2;CDK1
Cell cycle	4	0.000302733	0.00668594	13.7694	CCNB2;CCNB1;CDK1;YWHAH
Oocyte meiosis	4	0.000351892	0.00668594	13.2153	CCNB2;CCNB1;CDK1;YWHAH
Progesterone-mediated oocyte maturation	3	0.00224412	0.0319787	12.5296	CCNB2;CCNB1;CDK1
Cellular senescence	3	0.00777884	0.0833058	7.92117	CCNB2;CCNB1;CDK1
Hippo signaling pathway	3	0.00876903	0.0833058	7.57194	BIRC5;BMP6;YWHAH
Neutrophil extracellular trap formation	3	0.0130748	0.106466	6.50494	SELP;MPO;CAMP
Human immunodeficiency virus 1 infection	3	0.0177322	0.126342	5.78235	CCNB2;CCNB1;CDK1
Staphylococcus aureus infection	2	0.0253814	0.160749	8.53978	SELP;CAMP
Drug metabolism	2	0.0321527	0.183271	7.48755	RRM2;MPO
