# Supplementary material for: Blood Leukocyte Transcriptional Modules and Differentially Expressed Genes Associated with Disease Severity and Age in COVID-19 Patients
Source: Preprints.org preprint supplement (doi:10.20944/preprints202208.0181.v1), 2022-08-09
Supplement: Supplementary file 7 [file TableS9_Bando et al.xlsx]

## Sheet: Table S9
Table S9. List of the genes used for the construction of the modules’ subnetworks
Yellow module subnetwork
Gene	Category	Gene expression profile (Severe vs Mild)	Summary function
SH3GLB1	ME gene		Autophagy
RAB1A	ME gene		Autophagy
MAP2K1	ME gene		Autophagy
PIK3CA	ME gene		Autophagy
ATG16L1	ME gene		Autophagy
LAMP2	ME gene		Autophagy
PTEN	ME gene		Autophagy
MAPK1	ME gene		Autophagy
PRKCQ	ME gene		Autophagy
WIPI1	ME gene		Autophagy
NRBF2	ME gene		Autophagy
MAP1LC3B	ME gene		Autophagy
VAMP7	ME gene		Autophagy
VPS4B	ME gene		Necroptosis
CHMP2B	ME gene		Necroptosis
NBR1	ME gene		Autophagy
CHMP2A	ME gene		Necroptosis
MFN2	ME gene		Autophagy
STAM2	ME gene		Autophagy
CAMK2D	ME gene		Necroptosis
IFNGR1	ME gene		Necroptosis
CHMP1B	ME gene		Necroptosis
CASP1	ME gene		Necroptosis
FAS	ME gene		Necroptosis
JAK2	ME gene		Necroptosis
GLUL	ME gene		Necroptosis
TLR4	ME gene		Necroptosis
CHMP5	ME gene		Necroptosis
YWHAH	ME gene-DE (Sev x Mild)	Hyper	Apoptosis
ROCK1	ME gene		Apoptosis
SATB1	ME gene		Apoptosis
HMGB2	ME gene		Apoptosis
PSMB8	ME gene		Apoptosis
PSMB9	ME gene		Apoptosis
CASP9	ME gene		Apoptosis
PSMD9	ME gene		Apoptosis
TFDP1	ME gene		Apoptosis
TP53BP2	ME gene		Apoptosis
LYN	ME gene		phagocytosis
ACTR3	ME gene		phagocytosis
ARPC2	ME gene		phagocytosis
SPHK1	ME gene		phagocytosis
FCGR2B	ME gene		phagocytosis
VAV1	ME gene		phagocytosis
LGALS3BP	ME gene		Platelet activation, signaling and aggregation
SRGN	ME gene		Platelet activation, signaling and aggregation
CD63	ME gene		neutrophil activation involved in immune response
APBB1IP	ME gene		Platelet activation, signaling and aggregation
GNA13	ME gene		Platelet activation, signaling and aggregation
GNG10	ME gene		Platelet activation, signaling and aggregation
RAP1A	ME gene		Platelet activation, signaling and aggregation
GNG5	ME gene		neutrophil activation involved in immune response
FLNA	ME gene		Platelet activation, signaling and aggregation
GNB3	ME gene		Platelet activation, signaling and aggregation
EGLN1	ME gene		HIF-1 signaling pathway
LDHA	ME gene		HIF-1 signaling pathway
CUL2	ME gene		HIF-1 signaling pathway
LDHAL6A	ME gene		HIF-1 signaling pathway
CEBPB	ME gene		Cellular Senescence
HIST1H2BJ	ME gene		Cellular Senescence
H2AFZ	ME gene		Cellular Senescence
HIST1H2BK	ME gene		Cellular Senescence
UBE2D1	ME gene		Cellular Senescence
TXN	ME gene		Cellular Senescence
ETS2	ME gene		Cellular Senescence
HIST1H3A	ME gene		Cellular Senescence
HIST1H2AD	ME gene		Cellular Senescence
NBN	ME gene		Cellular Senescence
HIST1H2AC	ME gene		Cellular Senescence
ACAA1	ME gene		neutrophil activation involved in immune response
ACTR10	ME gene		neutrophil activation involved in immune response
ADAM10	ME gene		neutrophil activation involved in immune response
ALOX5	ME gene		neutrophil activation involved in immune response
AMPD3	ME gene		neutrophil activation involved in immune response
ANXA3	ME gene		neutrophil activation involved in immune response
ATP11B	ME gene		neutrophil activation involved in immune response
B2M	ME gene		neutrophil activation involved in immune response
BIN2	ME gene		neutrophil activation involved in immune response
BRI3	ME gene		neutrophil activation involved in immune response
BST1	ME gene		neutrophil activation involved in immune response
CD47	ME gene		neutrophil activation involved in immune response
CD58	ME gene		neutrophil activation involved in immune response
CLEC4D	ME gene		neutrophil activation involved in immune response
DOK3	ME gene		neutrophil activation involved in immune response
GOLGA7	ME gene		neutrophil activation involved in immune response
GYG1	ME-DE (Sev x Mild)	Hyper	neutrophil activation involved in immune response
HSPA1A	ME gene		neutrophil activation involved in immune response
IMPDH1	ME gene		neutrophil activation involved in immune response
MGST1	ME gene		neutrophil activation involved in immune response
MMP25	ME gene		neutrophil activation involved in immune response
MVP	ME gene		neutrophil activation involved in immune response
PGM1	ME gene		neutrophil activation involved in immune response
PRCP	ME gene		neutrophil activation involved in immune response
QPCT	ME gene		neutrophil activation involved in immune response
RAB18	ME gene		neutrophil activation involved in immune response
RAB27A	ME gene		neutrophil activation involved in immune response
RAB31	ME gene		neutrophil activation involved in immune response
RAB6A	ME gene		neutrophil activation involved in immune response
RNASE3	ME gene		neutrophil activation involved in immune response
RNASET2	ME gene		neutrophil activation involved in immune response
S100A12	ME gene		neutrophil activation involved in immune response
SDCBP	ME gene		neutrophil activation involved in immune response
SLCO4C1	ME gene		neutrophil activation involved in immune response
SNAP23	ME gene		neutrophil activation involved in immune response
STOM	ME gene-DE (Sev x Mild)	Hyper	neutrophil activation involved in immune response
VAPA	ME gene		neutrophil activation involved in immune response
YPEL5	ME gene		neutrophil activation involved in immune response
TMEM59	Hhub	Hyper	Autophagy
DECR1	Hhub		Metabolism
ATP6V1E1	Hhub		Autophagy
PRDX3	Hhub	Hyper	oxidative stress
SDHB	Hhub		oxidative stress
METTL6	Hhub		Transcription
EIF4A3	eHub	Hyper	Transcription
COPS5	eHub		Signaling
PAPD4	eHub		Metabolism
TXNDC12	eHub		Apoptosis
SNAPIN	iHub	Hyper	Autophagy
MBD2	iHub		Transcription
SPTLC1	iHub	Hyper	Autophagy
C1GALT1C1	iHub	Hyper	Apoptosis
LTF	DE (Sev x Mild)	Hyper	Apoptosis
HP	DE (Sev x Mild)	Hyper	Apoptosis
CEACAM8	DE (Sev x Mild)	Hyper	neutrophil activation involved in immune response
HPR	DE (Sev x Mild)	Hyper	Apoptosis
LCN2	DE (Sev x Mild)	Hyper	neutrophil activation involved in immune response
ARG1	DE (Sev x Mild)	Hyper	neutrophil activation involved in immune response
MPO	DE (Sev x Mild)	Hyper	Apoptosis
ORM1	DE (Sev x Mild)	Hyper	neutrophil activation involved in immune response
TXNDC5	DE (Sev x Mild)	Hyper	Apoptosis
ORM2	DE (Sev x Mild)	Hyper	neutrophil activation involved in immune response
CAMP	DE (Sev x Mild)	Hyper	neutrophil activation involved in immune response
RRM2	DE (Sev x Mild)	Hyper	p53-signaling
GGH	DE (Sev x Mild)	Hyper	neutrophil activation involved in immune response
SELP	DE (Sev x Mild)	Hyper	Platelet activation, signaling and aggregation
CCNB1	DE (Sev x Mild)	Hyper	p53-signaling
BMP6	DE (Sev x Mild)	Hyper	Hippo-signaling
BIRC5	DE (Sev x Mild)	Hyper	Hippo-signaling
SNCA	DE (Sev x Mild)	Hyper	Apoptosis
CCNB2	DE (Sev x Mild)	Hyper	p53-signaling
CDK1	DE (Sev x Mild)	Hyper	p53-signaling
Magenta module subnetwork
Gene	Category	Gene expression profile (Severe vs Mild)	Summary function
CALM1	ME gene		cytokine-signaling/cellular senescence
CRKL	ME gene		cytokine-signaling
EIF4G2	ME gene		cytokine-signaling
IKBKB	ME gene		fc receptor signaling
NFKB1	ME gene		cytokine-signaling/cellular senescence
PPP2CA	Hhub		fc receptor signaling
PPP2CB	ME gene		fc receptor signaling
PPP3CB	ME gene		Fc receptor signaling/cellular senescence
PSMB2	ME gene		fc receptor signaling
PSMC1	ME gene		fc receptor signaling
PSMD10	eHUB		fc receptor signaling
RASA2	ME gene		fc receptor signaling
RASSF5	iHub		cellular senescence
RBL2	ME gene		cellular senescence
TGFBR2	ME gene		cellular senescence
DHX15	Hhub		transcription
RNF114	Hhub		ubiquitination
DHX29	Hhub		transcription
KIAA0196	Hhub		endosome
CNOT8	Hhub		transcription
HTR3A	Hhub		inflammation
SYNGR4	eHub		endosome
JTB	eHub		protein binding
ARL6IP1	iHub		ER
SLBP	iHub		inflammation
LTF	DE (Sev x Mild)	Hyper	neutrophil activation involved in immune response
HP	DE (Sev x Mild)	Hyper	neutrophil activation involved in immune response
CEACAM8	DE (Sev x Mild)	Hyper	neutrophil activation involved in immune response
HPR	DE (Sev x Mild)	Hyper	inflammation/cell death
LCN2	DE (Sev x Mild)	Hyper	neutrophil activation involved in immune response
ARG1	DE (Sev x Mild)	Hyper	neutrophil activation involved in immune response
MPO	DE (Sev x Mild)	Hyper	neutrophil activation involved in immune response
ORM1	DE (Sev x Mild)	Hyper	neutrophil activation involved in immune response
TXNDC5	DE (Sev x Mild)	Hyper	neutrophil activation involved in immune response
ORM2	DE (Sev x Mild)	Hyper	neutrophil activation involved in immune response
CAMP	DE (Sev x Mild)	Hyper	neutrophil activation involved in immune response
RRM2	DE (Sev x Mild)	Hyper	p53-signaling
GGH	DE (Sev x Mild)	Hyper	neutrophil activation involved in immune response
SELP	DE (Sev x Mild)	Hyper	Platelet activation, signaling and aggregation
CCNB1	DE (Sev x Mild)	Hyper	p53-signaling/Cellular Senescence
BMP6	DE (Sev x Mild)	Hyper	Hippo signaling
BIRC5	DE (Sev x Mild)	Hyper	Hippo signaling
SNCA	DE (Sev x Mild)	Hyper	cell death
CCNB2	DE (Sev x Mild)	Hyper	p53-signaling/Cellular Senescence
CDK1	DE (Sev x Mild)	Hyper	p53-signaling/Cellular Senescence
Black module subnetwork
Gene	Category	Gene expression profile (A vs B)	Summary function
USP10	ME gene		I-kappaB kinase/NF-kappaB signaling
MUL1	ME gene		I-kappaB kinase/NF-kappaB signaling
TNFRSF10B	ME gene		I-kappaB kinase/NF-kappaB signaling
IRAK4	ME gene		I-kappaB kinase/NF-kappaB signaling
CFLAR	ME gene		I-kappaB kinase/NF-kappaB signaling
TBK1	ME gene		I-kappaB kinase/NF-kappaB signaling
TRIM39	ME gene		I-kappaB kinase/NF-kappaB signaling
UBD	ME gene		I-kappaB kinase/NF-kappaB signaling
TNFSF10	ME gene		I-kappaB kinase/NF-kappaB signaling
PLCG2	ME gene		I-kappaB kinase/NF-kappaB signaling
PRKD1	ME gene		I-kappaB kinase/NF-kappaB signaling
TLR6	ME gene		I-kappaB kinase/NF-kappaB signaling
UBE2V1	ME gene		I-kappaB kinase/NF-kappaB signaling
ALPK1	ME gene		I-kappaB kinase/NF-kappaB signaling
BIRC2	ME gene		I-kappaB kinase/NF-kappaB signaling
TLR1	ME gene		pattern recognition receptor signaling pathway
PLCG2	ME gene		pattern recognition receptor signaling pathway
HMGB1	ME gene		pattern recognition receptor signaling pathway
TLR2	ME gene		pattern recognition receptor signaling pathway
EVX1	Hhub		transcription
SHISA4	Hhub		protein binding
CYGB	Hhub		oxidative stress
LOC113230	Hhub		Unknown
FHL1	Hhub		JAK-STAT signaling
CACNA1C	Hhub		calcium signaling
HBZ	eHub		zeta-globin
PTMA	eHub		apoptosis
RAC1	eHub		Ras signaling
FOXP4	iHub		transcription
DPEP3	iHub		proteolysis
UCP3	iHub		Th17/Treg cell balance
PYY2	iHub		pseudogene
ME: Module Eigengene
